# Supplementary material
Source: bioRxiv or medRxiv preprint supplement (https://medrxiv.org/content/medrxiv/early/2024/09/19/2024.09.18.24313940/DC1/embed/media-1.pdf)
Supplement: Supplementary file [file media-1.pdf]

# Supplementary materials

## Contents

|                                                                                        |    |
|----------------------------------------------------------------------------------------|----|
| Statistical analysis.....                                                              | 3  |
| Table S1. Search strategy.....                                                         | 5  |
| Table S2. Eligibility criteria.....                                                    | 6  |
| Table S3. Data extraction template for included studies.....                           | 7  |
| Table S4. Risk of bias instrument.....                                                 | 8  |
| Table S5. Quantitative data extracted from included studies.....                       | 13 |
| Table S6. Excluded studies and reasons for exclusion.....                              | 19 |
| Table S7. Risk of bias assessment for included studies.....                            | 31 |
| Table S8. Studies excluded from the meta-analysis and reasons for exclusion.....       | 33 |
| Table S9. Funnel plots.....                                                            | 35 |
| Table S10. Meta-regression results.....                                                | 40 |
| Table S11. Leave-one-out analysis results.....                                         | 42 |
| Table S12. Ratio of odds ratios for disinfectant products and application methods..... | 45 |
| References.....                                                                        | 47 |



## Statistical analysis

Due to the heterogeneity of outcomes and exposures across the included studies, meta-analyses were conducted only when at least two primary studies with similar exposures and health outcomes were available. Health outcomes were categorized into clusters based on their specific characteristics and relevance to respiratory health, ocular-nasal conditions, and skin conditions. This categorization ensured that the meta-analyses could provide meaningful and comparable results across different health outcomes.

The statistical methodology utilized a two-tiered approach: a random-effects meta-analysis followed by a meta-regression analysis. The random-effects model was chosen to generate a pooled effect size across the studies because it accounts for the variability among study contexts, designs, and populations, implying that the true effect size may vary from study to study. The use of a random-effects framework was predicated on the presumption of inherent differences across these various factors, making it unrealistic to assume a common effect size. Parameters for the random-effects model were estimated using the Restricted Maximum Likelihood (REML) method, implemented via the metafor R package (Viechtbauer, 2010). The REML method is advantageous because it provides unbiased estimates of between-study variance even when the number of studies is small, enhancing the reliability of the meta-analysis results. To quantify the degree of heterogeneity among the study estimates, the  $I^2$  statistic was employed. The  $I^2$  statistic describes the percentage of variation across studies due to heterogeneity rather than chance, providing a measure of inconsistency among the study results. Additionally, the tau-squared ( $\tau^2$ ) statistic was calculated as a measure of the total between-study variance, offering a sense of the absolute variability in effect sizes. The Q statistic was used to test the null hypothesis that all studies share a common effect size, where a significant result indicates the presence of heterogeneity.

Following the random-effects meta-analysis, a meta-regression was performed to explore the impact of study-level characteristics on the observed effect sizes. Specifically, study design and sample size were included as moderators in the meta-regression model. The inclusion of these moderators was based on the hypothesis that methodological aspects of the studies, such as the type of study design and the scale of the study (as indicated by sample size), might systematically influence the reported effects. The meta-regression aimed to identify whether these study-level characteristics could explain some of the heterogeneity observed in the meta-analysis. The analysis assessed the residual heterogeneity and tested the significance of the moderators using the QM statistic, which evaluates whether the moderators jointly explain a significant amount of the

variance in effect sizes. The  $R^2$  statistic was used to quantify the proportion of heterogeneity explained by the model, indicating how much of the variability in effect sizes could be attributed to the included moderators.

**Table S1. Search strategy**

| Database      | Search string                                                                                                                                                                                                                                                                                                                                                                                                                                                                                                                                                                                                                                                                                                                                                                                                                                                                                                                                                                                                       |
|---------------|---------------------------------------------------------------------------------------------------------------------------------------------------------------------------------------------------------------------------------------------------------------------------------------------------------------------------------------------------------------------------------------------------------------------------------------------------------------------------------------------------------------------------------------------------------------------------------------------------------------------------------------------------------------------------------------------------------------------------------------------------------------------------------------------------------------------------------------------------------------------------------------------------------------------------------------------------------------------------------------------------------------------|
| MEDLINE       | ("healthcare workers"[All Fields] OR "clinical staff"[All Fields] OR "medical personnel"[All Fields] OR "hospital workers"[All Fields] OR "health workers"[All Fields]) AND ("chlorine"[All Fields] OR "bleach"[All Fields] OR "disinfect*"[All Fields] OR "chemical exposure"[All Fields] OR "sanitization"[All Fields] OR "cleaning agents"[All Fields]) AND ("health"[All Fields] OR "safety"[All Fields] OR "effects"[All Fields] OR "risks"[All Fields] OR "hazards"[All Fields] OR "exposure"[All Fields])                                                                                                                                                                                                                                                                                                                                                                                                                                                                                                    |
| Scopus        | ALL ( ( "healthcare workers" OR "clinical staff" OR "medical personnel" OR "hospital workers" OR "health workers" ) AND ( "chlorine" OR "bleach" OR "disinfect*" OR "chemical exposure" OR "sanitization" OR "cleaning agents" ) AND ( "health" OR "safety" OR "effects" OR "risks" OR "hazards" OR "exposure" ) ) AND ( LIMIT-TO ( OA , "all" ) ) AND ( LIMIT-TO ( DOCTYPE , "ar" ) OR LIMIT-TO ( DOCTYPE , "re" ) ) AND ( EXCLUDE ( SUBJAREA , "SOC" ) OR EXCLUDE ( SUBJAREA , "MATE" ) OR EXCLUDE ( SUBJAREA , "COMP" ) OR EXCLUDE ( SUBJAREA , "PHYS" ) OR EXCLUDE ( SUBJAREA , "ENER" ) OR EXCLUDE ( SUBJAREA , "VETE" ) OR EXCLUDE ( SUBJAREA , "BUSI" ) OR EXCLUDE ( SUBJAREA , "PSYC" ) OR EXCLUDE ( SUBJAREA , "ARTS" ) OR EXCLUDE ( SUBJAREA , "MATH" ) OR EXCLUDE ( SUBJAREA , "EART" ) OR EXCLUDE ( SUBJAREA , "ECON" ) OR EXCLUDE ( SUBJAREA , "DECI" ) OR EXCLUDE ( SUBJAREA , "NEUR" ) OR EXCLUDE ( SUBJAREA , "IMMU" ) OR EXCLUDE ( SUBJAREA , "AGRI" ) ) AND ( LIMIT-TO ( LANGUAGE , "English" ) ) |
| ScienceDirect | (healthcare workers OR medical personnel) AND (chlorine OR bleach OR disinfect) AND (health OR safety OR exposure)                                                                                                                                                                                                                                                                                                                                                                                                                                                                                                                                                                                                                                                                                                                                                                                                                                                                                                  |

**Table S2. Eligibility criteria**

| Category                | Inclusion                                                                                                                                                                                                        | Exclusion                                                                                                                      |
|-------------------------|------------------------------------------------------------------------------------------------------------------------------------------------------------------------------------------------------------------|--------------------------------------------------------------------------------------------------------------------------------|
| Participants/population | Healthcare workers exposed to chemical disinfectant products                                                                                                                                                     | Healthcare workers other frontline NOT exposed to chemical disinfectant products                                               |
| Exposure(s)             | Occupational exposure to chlorine-based disinfectants applied by spray or their gas (aerosolized form)                                                                                                           | Healthcare workers in settings with no occupational exposure to chemical disinfectant products or their gas (aerosolized form) |
| Comparator(s)/control   | Healthcare workers exposed to chemical disinfectant different than chlorine-based products and/or applied by different application methods                                                                       | Groups with an elevated risk for respiratory issues, eye conditions, or skin problems due to exposure to other products.       |
| Outcome                 | Respiratory (asthma, chronic obstructive pulmonary disease (COPD), or other obstructive diseases), eye (pain, worse sight than before, painful eyes) and skin symptoms (skin reactions, burning and dermatitis). | Other medical conditions usually not related to disinfectants exposure                                                         |
| Study design            | Case reports, case series, cohort studies, case-control studies, cross-sectional studies, experimental studies, and observational studies.                                                                       | Qualitative studies, studies with only abstracts, conference papers/posters, reviews, letters, editorials.                     |

**Table S3. Data extraction template for included studies**

| <b>Authors,<br/>Year, study<br/>design</b>                        | <b>Risk of bias</b>              | <b>Study<br/>objective</b>               | <b>Type of recruitment,<br/>population</b>                                                                                                               | <b>Sex, age</b>                                                                                                                                   | <b>Sample size</b>                                      | <b>Exposure (category),<br/>assessment</b>                                                                                                                             | <b>Outcome (cluster)<br/>assessment</b>                                                                                         | <b>Adjustment<br/>confounding</b>                                                                                                            |
|-------------------------------------------------------------------|----------------------------------|------------------------------------------|----------------------------------------------------------------------------------------------------------------------------------------------------------|---------------------------------------------------------------------------------------------------------------------------------------------------|---------------------------------------------------------|------------------------------------------------------------------------------------------------------------------------------------------------------------------------|---------------------------------------------------------------------------------------------------------------------------------|----------------------------------------------------------------------------------------------------------------------------------------------|
| Authors,<br>year of<br>publication,<br>Type of study<br>conducted | Results of<br>bias<br>assessment | Main aim or<br>objective of<br>the study | How participants<br>were recruited for<br>the study (e.g.,<br>random sampling,<br>convenience<br>sampling, volunteers<br>from a specific<br>population). | The demographics of<br>the participants,<br>including the<br>percentage of male<br>and female<br>participants and their<br>age range or mean age. | The total<br>number of<br>participants in<br>the study. | The methods used to<br>measure or assess the<br>exposure of interest<br>(e.g., self-reported<br>questionnaires, direct<br>measurements, use of<br>specific equipment). | The methods used to<br>measure the<br>outcomes of interest<br>(e.g., clinical<br>evaluations,<br>laboratory tests,<br>surveys). | Any confounding<br>variables that the study<br>adjusted for in its<br>analysis (e.g., age, sex,<br>smoking status,<br>socioeconomic status). |

**Table S4. Risk of bias instrument**

| Major risk of bias domains                                                                                                                                                                                                                                                                                                                                                                                                                                                                                | Risk | Criteria                                                                                                                                                                                                                                                                                                                                                                                                                |
|-----------------------------------------------------------------------------------------------------------------------------------------------------------------------------------------------------------------------------------------------------------------------------------------------------------------------------------------------------------------------------------------------------------------------------------------------------------------------------------------------------------|------|-------------------------------------------------------------------------------------------------------------------------------------------------------------------------------------------------------------------------------------------------------------------------------------------------------------------------------------------------------------------------------------------------------------------------|
| <p>1. Recruitment procedure &amp; follow-up (in cohort studies):</p> <p>For cohort studies</p> <p>HINT: We are looking for selection bias:</p> <ul style="list-style-type: none"> <li>- Was the cohort representative of a defined population? #</li> <li>- Was everybody included who should have been included? #</li> </ul> <p>PRELIMINARY RULING: If the cohort recruitment is based on a convenient/ self-reported sampling OR if response is &lt;10%, the study will be excluded from analysis.</p> | Low  | <ul style="list-style-type: none"> <li>▪ Cohort recruitment was acceptable. #</li> <li>▪ Baseline response level is acceptable (50% or more) OR is &lt;50% and &gt;30%, but substantial differential selection could be excluded (e. g. by a non-responder analysis).</li> <li>▪ Loss to follow-up is below 20% in total and not different between the two groups (up to 10% difference). *</li> </ul>                  |
|                                                                                                                                                                                                                                                                                                                                                                                                                                                                                                           | High | <ul style="list-style-type: none"> <li>▪ Cohort recruitment was not acceptable. #</li> <li>▪ Response not reported/ not calculable.</li> <li>▪ Total loss to follow-up is larger than acceptable (20% or more) * OR drop out differs between the groups by more than 10%* OR the reasons for drop out considerably differ between exposed and non-exposed groups. *</li> </ul>                                          |
| <p>For case-control studies</p> <p>HINT: We are looking for selection bias:</p> <ul style="list-style-type: none"> <li>- Were the cases and control subjects representative of the same defined population (“study base”; geographically and/or temporally)? #</li> </ul>                                                                                                                                                                                                                                 | Low  | <ul style="list-style-type: none"> <li>▪ Case selection and recruitment were acceptable. #</li> <li>▪ Control subjects’ selection and recruitment were acceptable. #</li> <li>▪ Non-response was less than 50% for cases and/or control subjects OR it was &gt;50% and &lt;70%, but substantial differential selection of cases and control subjects could be excluded (e.g., by a non-responder analysis) *</li> </ul> |



|                                                                                                                                                                                                                                                                                                                                                                                                                                                                                                          |      |                                                                                                                                                                                                                                                                                                                                                                                                                                         |
|----------------------------------------------------------------------------------------------------------------------------------------------------------------------------------------------------------------------------------------------------------------------------------------------------------------------------------------------------------------------------------------------------------------------------------------------------------------------------------------------------------|------|-----------------------------------------------------------------------------------------------------------------------------------------------------------------------------------------------------------------------------------------------------------------------------------------------------------------------------------------------------------------------------------------------------------------------------------------|
| <ul style="list-style-type: none"> <li>- Was there an established reliable system for selecting all the cases? #</li> <li>- The same exclusion criteria are used for both cases and controls. #</li> <li>- Comparison is made between participants and non-participants to establish their similarities or differences. #</li> </ul> <p>PRELIMINARY RULING: If the recruitment is based on a convenient/ self-reported sampling OR if response is &lt;10%, the study will be excluded from analysis.</p> | High | <ul style="list-style-type: none"> <li>▪ Case selection and recruitment were not acceptable. #</li> <li>▪ Control subjects' selection and recruitment were not acceptable. #</li> <li>▪ Non-response was &gt;70% for cases or control subjects OR it was &gt;50% and &lt;70%, but substantial differential selection of cases and control subjects could not be excluded. *</li> <li>▪ Response not reported/ not calculable</li> </ul> |
| <p>For cross-sectional studies</p> <p>HINT: We are looking for selection bias:</p> <ul style="list-style-type: none"> <li>- Was the study population representative of a defined population? #</li> <li>- Was everybody included who should have been included? #</li> </ul> <p>PRELIMINARY RULING: If the recruitment is based on a convenient/ self-reported sampling OR if response is &lt;10%, the study will be excluded from analysis.</p>                                                         | Low  | <ul style="list-style-type: none"> <li>▪ Recruitment of the study population was acceptable. #</li> <li>▪ Non-response was less than 50% OR it was &gt;50% and &lt;70%, but substantial differential selection of the study population could be excluded (e.g., by a non-responder analysis). *</li> </ul>                                                                                                                              |
|                                                                                                                                                                                                                                                                                                                                                                                                                                                                                                          | High | <ul style="list-style-type: none"> <li>▪ Recruitment of the study population was not acceptable. #</li> <li>▪ Non-response was &gt;70% OR it was &gt;50% and &lt;70%, but substantial differential selection of the study population could not be excluded. *</li> <li>▪ Response not reported/ not calculable.</li> </ul>                                                                                                              |
| <p>2. Exposure definition and measurement</p>                                                                                                                                                                                                                                                                                                                                                                                                                                                            | Low  | <ul style="list-style-type: none"> <li>▪ Exposure definition included at least basic job characteristics (e.g., job tasks, length of employment).</li> </ul>                                                                                                                                                                                                                                                                            |

|                                   |         |                                                                                                                                                                                                                                                                                                                                                                                                |
|-----------------------------------|---------|------------------------------------------------------------------------------------------------------------------------------------------------------------------------------------------------------------------------------------------------------------------------------------------------------------------------------------------------------------------------------------------------|
|                                   |         | <ul style="list-style-type: none"> <li>▪ Exposure was accurately measured to minimize bias: use of external validation, validated questionnaire or exposure is connected to a task) #</li> <li>▪ Adequate comparison group of non-exposed workers (e.g., office workers) included.</li> </ul>                                                                                                  |
|                                   | High    | <ul style="list-style-type: none"> <li>▪ Exposure does not cover basic job characteristics.</li> <li>▪ Exposure was not accurately measured (e.g., use of JEM only) #</li> <li>▪ Different methods were used to measure exposure in different groups/ cases and control subjects (in case-control studies).</li> <li>▪ No adequate comparison group of non-exposed workers included</li> </ul> |
|                                   | Unclear | <ul style="list-style-type: none"> <li>▪ Not reported</li> </ul>                                                                                                                                                                                                                                                                                                                               |
| 3. Outcome, Source and validation | Low     | <ul style="list-style-type: none"> <li>▪ Outcome was accurately/ objectively measured to minimize bias</li> <li>▪ Measurement methods were similar in the different groups. #</li> </ul>                                                                                                                                                                                                       |
|                                   | High    | <ul style="list-style-type: none"> <li>▪ Outcome was not accurately or subjectively measured (e.g., self-reported physician diagnosis or questionnaire). #</li> <li>▪ Measurement methods were different in the groups.</li> </ul>                                                                                                                                                             |
|                                   | Unclear | <ul style="list-style-type: none"> <li>▪ Not reported</li> </ul>                                                                                                                                                                                                                                                                                                                               |

|                                                              |         |                                                                                                                                                                                                                                                                                                                                                                                                |
|--------------------------------------------------------------|---------|------------------------------------------------------------------------------------------------------------------------------------------------------------------------------------------------------------------------------------------------------------------------------------------------------------------------------------------------------------------------------------------------|
| 4. Confounding and effect modification                       | Low     | <ul style="list-style-type: none"> <li>▪ If risk estimators were calculated, major confounding factors (at least age, sex, atopy) were considered.</li> <li>▪ If only prevalence or incidence was assessed, at least sex &amp; age (at least mean values for the study population) are described.</li> </ul>                                                                                   |
|                                                              | High    | <ul style="list-style-type: none"> <li>▪ Major confounding factors or effect modifiers were not considered.</li> </ul>                                                                                                                                                                                                                                                                         |
|                                                              | Unclear | <ul style="list-style-type: none"> <li>▪ Not reported</li> </ul>                                                                                                                                                                                                                                                                                                                               |
| 5. Analysis method: methods to reduce research specific bias | Low     | <ul style="list-style-type: none"> <li>▪ Authors used adequate statistical models to reduce bias (e.g., standardization, matching, adjustment in multivariate model, stratification, propensity scoring). §<br/>For prevalences, matching/stratification may not be required as long as a good description of the age structure and immunization status of the population is given.</li> </ul> |
|                                                              | High    | <ul style="list-style-type: none"> <li>▪ Authors did not use adequate statistical models to reduce bias.</li> </ul>                                                                                                                                                                                                                                                                            |
|                                                              | Unclear | <ul style="list-style-type: none"> <li>▪ Not reported</li> </ul>                                                                                                                                                                                                                                                                                                                               |
| 6. Chronology                                                | Low     | <ul style="list-style-type: none"> <li>▪ Incident diseases were included. #</li> <li>▪ Temporal relation may be established (exposure precedes the outcome). #</li> </ul>                                                                                                                                                                                                                      |
|                                                              | High    | <ul style="list-style-type: none"> <li>▪ Prevalent diseases were included OR prevalent diseases of baseline were not excluded (in cohort studies). #</li> <li>▪ Temporal relation cannot be established.</li> </ul>                                                                                                                                                                            |
|                                                              | Unclear | <ul style="list-style-type: none"> <li>▪ Not reported</li> </ul>                                                                                                                                                                                                                                                                                                                               |

| Minor risk of bias domains | Risk    | Criteria                                                                                                                                                                               |
|----------------------------|---------|----------------------------------------------------------------------------------------------------------------------------------------------------------------------------------------|
| 7. Blinding of assessors   | Low     | <ul style="list-style-type: none"> <li>Assessors were blinded</li> </ul>                                                                                                               |
|                            | High    | <ul style="list-style-type: none"> <li>Assessors were not blinded</li> </ul>                                                                                                           |
|                            | Unclear | <ul style="list-style-type: none"> <li>Not reported</li> </ul>                                                                                                                         |
| 8. Funding                 | Low     | <ul style="list-style-type: none"> <li>Grant/ non-profit-organizations*</li> <li>Study was clearly not affected by sponsors. *</li> </ul>                                              |
|                            | High    | <ul style="list-style-type: none"> <li>Sponsoring organization participated in data analysis.</li> <li>Study was probably affected by sponsors.</li> </ul>                             |
|                            | Unclear | <ul style="list-style-type: none"> <li>Industry, combined industry grant*, unclear if study was affected by</li> <li>sponsors.</li> <li>Not reported.</li> </ul>                       |
| 9. Conflict of interest    | Low     | <ul style="list-style-type: none"> <li>Reported not having conflict of interest or clear from report/ communication that study was not affected by author(s) affiliation. *</li> </ul> |
|                            | High    | <ul style="list-style-type: none"> <li>Conflict of interest exists (at least one author). *</li> </ul>                                                                                 |
|                            | Unclear | <ul style="list-style-type: none"> <li>Not reported.</li> </ul>                                                                                                                        |

|                         |     |                                                                                 |
|-------------------------|-----|---------------------------------------------------------------------------------|
| Overall Assessment      | Low | <ul style="list-style-type: none"> <li>low risk in all major domains</li> </ul> |
| General rule for rating |     |                                                                                 |

**Table S5. Quantitative data extracted from included studies**

| Chlorine-base products |                  |                        |                           |                      |         |             |
|------------------------|------------------|------------------------|---------------------------|----------------------|---------|-------------|
| Study                  | Specific product | Health outcome         | Health condition clusters | OR (95% CI)          | p-value | Sample size |
| Dumas et al., 2017     | Bleach           | Poorer asthma control  | Respiratory               | 1.55<br>(1.14-2.1)   | 0.02    | 1884        |
| Dumas et al., 2012     | Bleach           |                        |                           | 2.11<br>(0.88-5.03)  | >0.05   | 212         |
| Gonzalez et al., 2014  | Bleach           | New-onset asthma       | Respiratory               | 2.08<br>(0.86-5.0)   | 0.1     | 543         |
| Garrido et al., 2022   | Bleach           | Respiratory symptoms   | Respiratory               | 2.46<br>(1.01-6.89)  | >0.05   | 307         |
| Kobos et al., 2022     | Bleach           | Skin Disorder          | Skin                      | 1.79<br>(1.14-2.8)   | 0.05    | 559         |
| Mehtar et al., 2016    | Chlorine 0,05%   | Respiratory conditions | Respiratory               | 32.95<br>(22.0-49.0) | <0.001  | 1550        |
| Mehtar et al., 2016    | Chlorine 0,05%   | Eye conditions         | Ocular-nasal              | 30.95<br>(21.0-43.0) | <0.001  | 1550        |
| Mehtar et al., 2016    | Chlorine 0,05%   | Skin conditions        | Skin                      | 22.95<br>(15.0-32.0) | <0.001  | 1550        |
| Mwanga et al., 2023    | Bleach           | WRONS*                 | Ocular-nasal              | 1.12<br>(0.7-1.78)   | >0.05   | 697         |
| Mwanga et al., 2023    | Bleach           | WRONS**                | Ocular-nasal              | 0.69<br>(0.34-1.42)  | >0.05   | 697         |
| Mwanga et al., 2023    | Bleach           | WRONS***               | Ocular-nasal              | 2.37<br>(1.3-4.34)   | <0.001  | 697         |
| Mwanga et al., 2023    | Bleach           | Work-related Asthma*   | Respiratory               | 0.65<br>(0.32-1.33)  | >0.05   | 697         |
| Mwanga et al., 2023    | Bleach           | Work-related Asthma**  | Respiratory               | 0.24<br>(0.06-1.03)  | >0.05   | 697         |
| Mwanga et al., 2023    | Bleach           | Work-related Asthma*** | Respiratory               | 1.16<br>(0.49-2.75)  | >0.05   | 697         |
| Ndlela & Naidoo, 2023  | Chlorine         | Breathless with Wheeze | Respiratory               | 1.26<br>(0.45-3.46)  | >0.05   | 174         |
| Ndlela & Naidoo, 2023  | Chlorine         | Wheeze without cold    | Respiratory               | 1.48<br>(0.59-3.68)  | >0.05   | 174         |
| Ndlela & Naidoo, 2023  | Chlorine         | Shortness of Breath    | Respiratory               | 1.27<br>(0.48-3.21)  | >0.05   | 174         |

| Ndlela & Naidoo, 2023 | Chlorine                | Chronic Cough          | Respiratory                   | 1.13<br>(0.45-2.08)      | >0.05          | 174                |
|-----------------------|-------------------------|------------------------|-------------------------------|--------------------------|----------------|--------------------|
| Ndlela & Naidoo, 2023 | Chlorine                | Chronic Phlegm         | Respiratory                   | 0.64<br>(0.19-2.14)      | >0.05          | 174                |
| Ndlela & Naidoo, 2023 | Chlorine                | Breathlessness         | Respiratory                   | 1.04<br>(0.41-2.64)      | >0.05          | 174                |
| Ndlela & Naidoo, 2023 | Bleach                  | Breathless with Wheeze | Respiratory                   | 1.39<br>(0.47-4.08)      | >0.05          | 174                |
| Ndlela & Naidoo, 2023 | Bleach                  | Wheeze without cold    | Respiratory                   | 0.8<br>(0.31-2.05)       | >0.05          | 174                |
| Ndlela & Naidoo, 2023 | Bleach                  | Shortness of Breath    | Respiratory                   | 1.68<br>(0.55-5.14)      | >0.05          | 174                |
| Ndlela & Naidoo, 2023 | Bleach                  | Chronic Cough          | Respiratory                   | 1.5<br>(0.61-3.65)       | >0.05          | 174                |
| Ndlela & Naidoo, 2023 | Bleach                  | Chronic Phlegm         | Respiratory                   | 0.34<br>(0.97-1.2)       | >0.05          | 174                |
| Ndlela & Naidoo, 2023 | Bleach                  | Breathlessness         | Respiratory                   | 1.33<br>(0.48-3.68)      | >0.05          | 174                |
| Su et al., 2019       | Chlorine                | U-Asthma               | Respiratory                   | 3.11<br>(1.46-6.63)      | 0.003          | 885                |
| Su et al., 2019       | Chlorine                | Asthma exacerbations   | Respiratory                   | 2.71<br>(1.25-5.86)      | 0.011          | 885                |
| Patel et al, 2023     | Bleach                  | New asthma onset       | Respiratory                   | 1.91<br>(1.10-3.33)      | <0.05          | 2,421              |
| <b>Glutaraldehyde</b> |                         |                        |                               |                          |                |                    |
| <b>Study</b>          | <b>Specific product</b> | <b>Health outcome</b>  | <b>Health outcome cluster</b> | <b>OR (95% CI)</b>       | <b>p-value</b> | <b>Sample size</b> |
| Gonzalez et al., 2014 | GU                      | New-onset asthma       | Respiratory                   | 3.01<br>(0.92-9.86)      | 0.06           | 248                |
| Dumas et al., 2017    | GU                      | Poorer asthma control  | Respiratory                   | 1.54<br>(1.15-2.06)      | 0.02           | 2193               |
| Norbäck, 1988         | GU                      | Nasal catarrh          | Ocular-nasal                  | 3.0<br>(NA-NA)           | 0.04           | 107                |
| Dumas et al., 2020    | GU                      | Asthma incidence       | Respiratory                   | (HR) 1.11<br>(0.88-1.41) | >0.05          | 35,665             |
| Dumas et al., 2021    | GU                      | Asthma incidence       | Respiratory                   | (HR) 1.61<br>(1.00-2.59) | >0.05          | 1,869              |
| Norbäck, 1988         | GU                      | Nasal obstruction      | Respiratory                   | 2.9<br>(NA-NA)           | 0.03           | 107                |

|                                      |                         |                        |                               |                      |                |                    |
|--------------------------------------|-------------------------|------------------------|-------------------------------|----------------------|----------------|--------------------|
| Norbäck, 1988                        | GU                      | Smarting of the throat | Respiratory                   | 3.6<br>(NA-NA)       | 0.02           | 107                |
| Norbäck, 1988                        | GU                      | Headache               | Neurological                  | 2.6<br>(NA-NA)       | 0.04           | 107                |
| Norbäck, 1988                        | GU                      | Nausea                 | Gastrointestinal              | 4.9<br>(NA-NA)       | 0.05           | 107                |
| Norbäck, 1988                        | GU                      | Rashes on the hands    | Skin                          | 4.4<br>(NA-NA)       | 0.0009         | 107                |
| Norbäck, 1988                        | GU                      | Eczema                 | Skin                          | 6.2<br>(NA-NA)       | 0.002          | 107                |
| Mwanga et al., 2023                  | GU                      | WRONS*                 | Ocular-nasal                  | 1.2<br>(0.56-2.57)   | >0.05          | 697                |
| Mwanga et al., 2023                  | GU                      | WRONS**                | Ocular-nasal                  | 0.57<br>(0.17-1.95)  | >0.05          | 697                |
| Mwanga et al., 2023                  | GU                      | WRONS***               | Ocular-nasal                  | 3.69<br>(1.3-10.45)  | <0.05          | 697                |
| Mwanga et al., 2023                  | GU                      | Work-related Asthma*   | Respiratory                   | 0.88<br>(0.29-2.66)  | >0.05          | 697                |
| Mwanga et al., 2023                  | GU                      | Work-related Asthma**  | Respiratory                   | 0.79<br>(0.18-3.57)  | >0.05          | 697                |
| Mwanga et al., 2023                  | GU                      | Work-related Asthma*** | Respiratory                   | 1.45<br>(0.3-6.95)   | >0.05          | 697                |
| Patel et al., 2023                   | GU                      | New onset asthma       | Respiratory                   | 1.24 (0.78-1.95)     | >0.05          | 2,421              |
| <b>Quaternary Ammonium Compounds</b> |                         |                        |                               |                      |                |                    |
| <b>Study</b>                         | <b>Specific product</b> | <b>Health outcome</b>  | <b>Health outcome cluster</b> | <b>OR (95% CI)</b>   | <b>p-value</b> | <b>Sample size</b> |
| Gonzalez et al., 2014                | QACs                    | New asthma             | Respiratory                   | 7.56<br>(1.84-31.05) | 0.005          | 543                |
| Gonzalez et al., 2014                | QACs                    | Nasal symptoms         | Ocular-nasal                  | 3.21<br>(1.42-7.22)  | 0.005          | 543                |
| Dumas et al., 2017                   | QACs                    | Poorer asthma control  | Respiratory                   | 1.31<br>(0.97-1.75)  | 0.14           | 4102               |
| Kobos et al., 2022                   | QACs                    | Skin Disorders         | Skin                          | 2.49<br>(1.25-4.94)  | 0.05           | 559                |
| Su et al., 2019                      | QACs                    | Mild asthma            | Respiratory                   | 0.64<br>(0.35-1.19)  | NA             | 2030               |
| Su et al., 2019                      | QACs                    | U-Asthma               | Respiratory                   | 1.29<br>(0.47-3.49)  | NA             | 2030               |
| Su et al., 2019                      | QACs                    | Asthma exacerbations   | Respiratory                   | 1.37                 | NA             | 2030               |

|                                                          |                         |                                                                |                               |                      |                |                    |
|----------------------------------------------------------|-------------------------|----------------------------------------------------------------|-------------------------------|----------------------|----------------|--------------------|
|                                                          |                         |                                                                |                               | (0.48-3.9)           |                |                    |
| Ndlela & Naidoo, 2023                                    | QACs                    | Breathless with Wheeze                                         | Respiratory                   | 0.95<br>(0.33-2.73)  | >0.05          | 174                |
| Ndlela & Naidoo, 2023                                    | QACs                    | Wheeze without cold                                            | Respiratory                   | 1.28<br>(0.49-3.33)  | >0.05          | 174                |
| Ndlela & Naidoo, 2023                                    | QACs                    | Shortness of Breath                                            | Respiratory                   | 3.44<br>(1.13-10.51) | <0.05          | 174                |
| Ndlela & Naidoo, 2023                                    | QACs                    | Chronic Cough                                                  | Respiratory                   | 0.69<br>(0.26-1.82)  | >0.05          | 174                |
| Ndlela & Naidoo, 2023                                    | QACs                    | Chronic Phlegm                                                 | Respiratory                   | 0.59<br>(0.18-1.91)  | >0.05          | 174                |
| Ndlela & Naidoo, 2023                                    | QACs                    | Breathlessness                                                 | Respiratory                   | 1.72<br>(0.66-4.47)  | >0.05          | 174                |
| Mwanga et al., 2023                                      | QACs                    | WRONS                                                          | Ocular-nasal                  | 1.04<br>(0.33-3.26)  | >0.05          | 697                |
| Mwanga et al., 2023                                      | QACs                    | Work-related Asthma                                            | Respiratory                   | 2.7<br>(0.71-10.23)  | >0.05          | 697                |
| Patel et al, 2023                                        | QACs                    | New asthma onset                                               | Respiratory                   | 1.91<br>(1.10-3.33)  | <0.05          | 2,421              |
| <b>Peracetic acid, acetic acid and hydrogen peroxide</b> |                         |                                                                |                               |                      |                |                    |
| <b>Study</b>                                             | <b>Specific product</b> | <b>Health outcome</b>                                          | <b>Health outcome cluster</b> | <b>OR (95% CI)</b>   | <b>p-value</b> | <b>Sample size</b> |
| Dalton et al., 2023                                      | PAA, AA, and HP         | Inflammation                                                   | Respiratory                   | NA                   | NA             | 38                 |
| Otterspoor and Farrell, 2019                             | PAA                     | increased safe-work related incident reporting                 |                               | NA                   | NA             | 64                 |
| Casey et al., 2017                                       | PAA, AA, and HP         | watery eyes                                                    | Ocular-nasal                  | 2.88<br>(NA-NA)      | >0.05          | 163                |
| Kobos et al., 2022                                       | HP                      | Allergic Reactions                                             | Immunological                 | 6.12<br>(1.18-44.47) | 0.05           | 559                |
| Hawley et al., 2018                                      | PAA, AA, and HP         | eye (44%), upper airway (58%), and lower airway (34%) symptoms |                               |                      |                | 50                 |
| Blackley et al., 2023                                    | PAA, AA, and HP         | Nasal irritation                                               | Ocular-nasal                  | 1.91<br>(1.12-3.23)  | NA             | 67                 |
| Blackley et al., 2023                                    | PAA, AA, and HP         | Eye irritation                                                 | Ocular-nasal                  | 1.72<br>(1.14-2.6)   | NA             | 67                 |
| <b>Use of spraying</b>                                   |                         |                                                                |                               |                      |                |                    |
| <b>Study</b>                                             | <b>Exposure</b>         | <b>Health outcome</b>                                          | <b>Health outcome cluster</b> | <b>OR (95% CI)</b>   | <b>p-value</b> | <b>Sample size</b> |
| Lee et al., 2014                                         | high exposure           | SRCE                                                           | CRS                           | 1.79<br>(0.81-3.96)  | >0.05          | 183                |



| Lee et al., 2014                  | high exposure             | Respiratory symptoms   | Respiratory                                     | 1.98<br>(0.87-4.51)           | >0.05                | 183            |                    |
|-----------------------------------|---------------------------|------------------------|-------------------------------------------------|-------------------------------|----------------------|----------------|--------------------|
| Lee et al., 2014                  | medium exposure           | SRCE                   | CRS                                             | 2.82<br>(1.16-6.82)           | <0.05                | 183            |                    |
| Lee et al., 2014                  | NA                        | Respiratory symptoms   | Respiratory                                     | 3.16<br>(1.24-8.04)           | <0.05                | 18             |                    |
| Mwanga et al., 2023               | medium exposure           | HASS                   | Respiratory                                     | 5.01<br>(1.8-13.91)           | <0.01                | 697            |                    |
| Dumas et al., 2012                | NA                        | Current asthma         | Respiratory                                     | 2.87<br>(1.02-8.11)           | <0.05                | 724            |                    |
| Mehtar et al., 2016               | NA                        | Respiratory conditions | Respiratory                                     | 32.95<br>(22-49)              | <0.001               | 1550           |                    |
| Mehtar et al., 2016               | NA                        | Eye conditions         | Ocular-nasal                                    | 30.95<br>(21-43)              | <0.001               | 1550           |                    |
| Mehtar et al., 2016               | NA                        | Skin conditions        | Skin conditions                                 | 22.95<br>(15-32)              | <0.001               | 1550           |                    |
| Gonzalez et al., 2014             | NA                        | New-onset asthma       | Respiratory                                     | 1.3<br>(0.56-3.04)            | 0.53                 | 543            |                    |
| Patel et al., 2023                |                           | New asthma onset       | Respiratory                                     | 1.92<br>(1.12-3.47)           | <0.05                | 2,421          |                    |
| <b>General disinfection tasks</b> |                           |                        |                                                 |                               |                      |                |                    |
| <b>Study</b>                      | <b>tasks</b>              | <b>Exposure</b>        | <b>Health outcome</b>                           | <b>Health outcome cluster</b> | <b>OR (95% CI)</b>   | <b>p-value</b> | <b>Sample size</b> |
| Caridi et al., 2019               | Clean Fixed Surfaces      | NA                     | moderate exacerbation                           | Respiratory                   | 3.10<br>(1.25-7.67)  | <0.05          | 2,030              |
| Caridi et al., 2019               | Clean Fixed Surfaces      | NA                     | Current asthma                                  | Respiratory                   | 1.84<br>(1.26, 2.68) | <0.05          | 2,030              |
| Caridi et al., 2019               | Clean Fixed Surfaces      | NA                     | bronchial hyper-responsiveness-related symptoms | Respiratory                   | 1.38<br>(1.08-1.77)  | <0.05          | 2,030              |
| Gonzalez et al., 2014             | general disinfection      | NA                     | New-onset asthma                                | Respiratory                   | 4.68<br>(1.08-20.22) | 0.03           | 543                |
| Gonzalez et al., 2014             | dilution of disinfectants | NA                     | New-onset asthma                                | Respiratory                   | 4.56<br>(1-20.29)    | 0.049          | 543                |

|                                                                                                                                                                                                                                                                                                                                                                                                                                                                                                                |                                                     |                         |                      |              |                     |       |     |
|----------------------------------------------------------------------------------------------------------------------------------------------------------------------------------------------------------------------------------------------------------------------------------------------------------------------------------------------------------------------------------------------------------------------------------------------------------------------------------------------------------------|-----------------------------------------------------|-------------------------|----------------------|--------------|---------------------|-------|-----|
| Dumas et al., 2012                                                                                                                                                                                                                                                                                                                                                                                                                                                                                             | cleaning/disinfecting tasks                         | moderate/high intensity | Current asthma       | Respiratory  | 2.32<br>(1.11-4.86) | <0.05 | 724 |
| Lee et al., 2014                                                                                                                                                                                                                                                                                                                                                                                                                                                                                               | Mopping, wet cleaning, and damp wiping              | medium exposure         | SRCE                 | CRS          | 1.36<br>(0.52-3.61) | >0.05 | 183 |
| Lee et al., 2014                                                                                                                                                                                                                                                                                                                                                                                                                                                                                               | Mopping, wet cleaning, and damp wiping              | high exposure           | SRCE                 | CRS          | 1.62<br>(0.58-4.55) | >0.05 | 183 |
| Lee et al., 2014                                                                                                                                                                                                                                                                                                                                                                                                                                                                                               | Mopping, wet cleaning, and damp wiping              | medium exposure         | Respiratory symptoms | Respiratory  | 2.3<br>(0.74-7.17)  | >0.05 | 183 |
| Lee et al., 2014                                                                                                                                                                                                                                                                                                                                                                                                                                                                                               | Mopping, wet cleaning, and damp wiping              | high exposure           | Respiratory symptoms | Respiratory  | 3.11<br>(0.94-10.3) | >0.05 | 183 |
| Mwanga et al., 2023                                                                                                                                                                                                                                                                                                                                                                                                                                                                                            | Manually sterilise/disinfection medical instruments | ≥100 min/week           | WRONS                | Ocular-nasal | 2.92<br>(1.33-6.41) | <0.01 | 37  |
| <p>OR = Odds ratio, 95% CI = 95% confidence interval, WRONS = Work-related ocular-nasal symptoms, * = Exposed versus not exposed, ** = exposed 1–99 min/week, *** = exposed ≥100 min/week, U-Asthma = Undiagnosed/untreated asthma, GU = glutaraldehyde, CH = Cohort study, CR = Cross-sectional study, CA = Case control study, CS = Case study, SRCE = Symptoms related to chemical exposure, CRS = Chemical-related symptoms, HASS = Higher Asthma Symptom Score, NA = Not applicable, HR = hazard rate</p> |                                                     |                         |                      |              |                     |       |     |



| Reference<br>(o = outcome, i = intervention, p = population, d = design, b = background article, t = publication type, l = language, u = Update available, r = only research protocol, n = reports not retrieved) | Reasons for exclusion |   |   |   |   |   |   |   |   |   |
|-------------------------------------------------------------------------------------------------------------------------------------------------------------------------------------------------------------------|-----------------------|---|---|---|---|---|---|---|---|---|
|                                                                                                                                                                                                                   | o                     | i | p | d | b | t | l | u | r | n |
| (Bernardini et al., 1983)                                                                                                                                                                                         |                       |   |   |   |   |   |   |   |   | X |
| (Bessonneau et al., 2013)                                                                                                                                                                                         |                       | X |   |   |   |   |   |   |   |   |
| (Bhat et al., 2022)                                                                                                                                                                                               |                       |   |   | X |   |   |   |   |   |   |
| (Bijlsma & Cohen, 2016)                                                                                                                                                                                           |                       |   |   |   |   | X |   |   |   |   |
| (Brune et al., 2021)                                                                                                                                                                                              | X                     |   |   |   |   |   |   |   |   |   |
| (Burgaz et al., 1992)                                                                                                                                                                                             | X                     |   |   |   |   |   |   |   |   |   |
| (Byrns et al., 2017)                                                                                                                                                                                              | X                     |   |   |   |   |   |   |   |   |   |
| (Caetano et al., 2021)                                                                                                                                                                                            | X                     |   |   |   |   |   |   |   |   |   |
| (Carling, 2021)                                                                                                                                                                                                   |                       |   |   | X |   |   |   |   |   |   |
| (Carling et al., 2023)                                                                                                                                                                                            | X                     |   |   |   |   |   |   |   |   |   |
| (Carol Sharma et al., 2023)                                                                                                                                                                                       |                       |   | X |   |   |   |   |   |   |   |
| (Carvalho & Conte-Junior, 2021)                                                                                                                                                                                   |                       | X |   |   |   |   |   |   |   |   |
| (CC et al., 2011)                                                                                                                                                                                                 |                       |   | X |   |   |   |   |   |   |   |
| (Cebeci et al., 2021)                                                                                                                                                                                             |                       | X |   |   |   |   |   |   |   |   |
| (Centers for Diseases Prevention and Control, 1984)                                                                                                                                                               |                       |   |   |   |   |   |   |   |   | X |
| (Chaari et al., 2010)                                                                                                                                                                                             |                       |   |   |   | X |   |   |   |   |   |
| (Charlier et al., 2021)                                                                                                                                                                                           |                       |   |   | X |   |   |   |   |   |   |
| (Choi et al., 2021)                                                                                                                                                                                               |                       |   |   | X |   |   |   |   |   |   |
| (CL et al., 2016)                                                                                                                                                                                                 |                       | X |   |   |   |   |   |   |   |   |
| (Clausen et al., 2020)                                                                                                                                                                                            |                       |   |   | X |   |   |   |   |   |   |
| (Cochrane et al., 2015)                                                                                                                                                                                           |                       |   |   | X |   |   |   |   |   |   |
| (Coggon et al., 2004)                                                                                                                                                                                             |                       |   | X |   |   |   |   |   |   |   |
| (CP et al., 2005)                                                                                                                                                                                                 |                       |   |   |   | X |   |   |   |   |   |
| (Cucurachi & MG, 2010)                                                                                                                                                                                            |                       |   | X |   |   |   |   |   |   |   |
| (Curran et al., 2019)                                                                                                                                                                                             |                       |   |   | X |   |   |   |   |   |   |
| (Cutts et al., 2021)                                                                                                                                                                                              | X                     |   |   |   |   |   |   |   |   |   |
| (Cutuli et al., 2021)                                                                                                                                                                                             |                       | X |   |   |   |   |   |   |   |   |
| (CY et al., 2003)                                                                                                                                                                                                 |                       |   |   |   |   |   | X |   |   |   |
| (Daba et al., 2022)                                                                                                                                                                                               |                       | X |   |   |   |   |   |   |   |   |
| (Davidovits et al., 2003)                                                                                                                                                                                         |                       |   | X |   |   |   |   |   |   |   |

| Reference<br>(o = outcome, i = intervention, p = population, d = design, b = background article, t = publication type, l = language, u = Update available, r = only research protocol, n = reports not retrieved) | Reasons for exclusion |   |   |   |   |   |   |   |   |   |
|-------------------------------------------------------------------------------------------------------------------------------------------------------------------------------------------------------------------|-----------------------|---|---|---|---|---|---|---|---|---|
|                                                                                                                                                                                                                   | o                     | i | p | d | b | t | l | u | r | n |
| (De Groot et al., 2021)                                                                                                                                                                                           |                       | X |   |   |   |   |   |   |   |   |
| (de Oliveira et al., 2023)                                                                                                                                                                                        | X                     |   |   |   |   |   |   |   |   |   |
| (De Troeyer et al., 2022)                                                                                                                                                                                         |                       |   | X |   |   |   |   |   |   |   |
| (Delclos et al., 2007)                                                                                                                                                                                            |                       | X |   |   |   |   |   |   |   |   |
| (Descatha et al., 2023)                                                                                                                                                                                           |                       | X |   |   |   |   |   |   |   |   |
| (Dhama et al., 2021)                                                                                                                                                                                              |                       |   | X |   |   |   |   |   |   |   |
| (DJ et al., 1993)                                                                                                                                                                                                 |                       | X |   |   |   |   |   |   |   |   |
| (Doll et al., 2018)                                                                                                                                                                                               |                       |   |   |   |   |   |   |   |   |   |
| (Donnay et al., 2011)                                                                                                                                                                                             |                       |   |   | X |   |   |   |   |   |   |
| (Doolan & Crilly, 2019)                                                                                                                                                                                           |                       | X |   |   |   |   |   |   |   |   |
| (Dore et al., 2022)                                                                                                                                                                                               |                       |   | X |   |   |   |   |   |   |   |
| (Dorgham & Dorgham, 2021)                                                                                                                                                                                         |                       |   |   | X |   |   |   |   |   |   |
| (Dotson et al., 2020)                                                                                                                                                                                             | X                     |   |   |   |   |   |   |   |   |   |
| (Dumas, 2021)                                                                                                                                                                                                     |                       |   |   |   |   |   |   | X |   |   |
| (Dumas, Bédard, et al., 2021)                                                                                                                                                                                     | X                     |   |   |   |   |   |   |   |   |   |
| (Dumas & Le Moual, 2020)                                                                                                                                                                                          |                       |   |   | X |   |   |   |   |   |   |
| (Dumas et al., 2014)                                                                                                                                                                                              | X                     |   |   |   |   |   |   |   |   |   |
| (Dumas et al., 2015)                                                                                                                                                                                              | X                     |   |   |   |   |   |   |   |   |   |
| (Dumas, Wiley, Henneberger, et al., 2017)                                                                                                                                                                         |                       | X |   |   |   |   |   |   |   |   |
| (EL et al., 2020)                                                                                                                                                                                                 |                       | X |   |   |   |   |   |   |   |   |
| (Epelle et al., 2023)                                                                                                                                                                                             |                       |   |   | X |   |   |   |   |   |   |
| (Erdem et al., 2020)                                                                                                                                                                                              |                       | X |   |   |   |   |   |   |   |   |
| (Erfani et al., 2023)                                                                                                                                                                                             |                       |   |   | X |   |   |   |   |   |   |
| (Estienney et al., 2022)                                                                                                                                                                                          | X                     |   |   |   |   |   |   |   |   |   |
| (F et al., 1998)                                                                                                                                                                                                  |                       |   |   |   |   |   |   |   |   | X |
| (Faller et al., 2018)                                                                                                                                                                                             |                       | X |   |   |   |   |   |   |   |   |
| (Felemban et al., 2021)                                                                                                                                                                                           |                       | X |   |   |   |   |   |   |   |   |
| (Fickenscher et al., 2023)                                                                                                                                                                                        | X                     |   |   |   |   |   |   |   |   |   |
| (Flyvholm, 1993)                                                                                                                                                                                                  |                       |   | X |   |   |   |   |   |   |   |
| (Folletti et al., 2017)                                                                                                                                                                                           |                       |   | X |   |   |   |   |   |   |   |

| Reference<br>(o = outcome, i = intervention, p = population, d = design, b = background article, t = publication type, l = language, u = Update available, r = only research protocol, n = reports not retrieved) | Reasons for exclusion |   |   |   |   |   |   |   |   |   |
|-------------------------------------------------------------------------------------------------------------------------------------------------------------------------------------------------------------------|-----------------------|---|---|---|---|---|---|---|---|---|
|                                                                                                                                                                                                                   | o                     | i | p | d | b | t | l | u | r | n |
| (França et al., 2019)                                                                                                                                                                                             |                       | X |   |   |   |   |   |   |   |   |
| (Frickmann et al., 2018)                                                                                                                                                                                          |                       | X |   |   |   |   |   |   |   |   |
| (García-Ávila et al., 2020)                                                                                                                                                                                       |                       |   | X |   |   |   |   |   |   |   |
| (Garvey et al., 2018)                                                                                                                                                                                             | X                     |   |   |   |   |   |   |   |   |   |
| (Gasparini et al., 2020)                                                                                                                                                                                          |                       | X |   |   |   |   |   |   |   |   |
| (Ge et al., 2021)                                                                                                                                                                                                 | X                     |   |   |   |   |   |   |   |   |   |
| (Gerding et al., 2023)                                                                                                                                                                                            |                       |   | X |   |   |   |   |   |   |   |
| (Gerster et al., 2014)                                                                                                                                                                                            |                       |   | X |   |   |   |   |   |   |   |
| (Ghafoor et al., 2021)                                                                                                                                                                                            |                       |   | X |   |   |   |   |   |   |   |
| (Gharaibeh et al., 2021)                                                                                                                                                                                          | X                     |   |   |   |   |   |   |   |   |   |
| (Ghelli et al., 2022)                                                                                                                                                                                             |                       | X |   |   |   |   |   |   |   |   |
| (Goodyear et al., 2018)                                                                                                                                                                                           | X                     |   |   |   |   |   |   |   |   |   |
| (Gould, 1994)                                                                                                                                                                                                     |                       | X |   |   |   |   |   |   |   |   |
| (Graham et al., 2023)                                                                                                                                                                                             |                       |   | X |   |   |   |   |   |   |   |
| (Groenewold et al., 2019)                                                                                                                                                                                         |                       |   | X |   |   |   |   |   |   |   |
| (Gruszecka et al., 2021)                                                                                                                                                                                          | X                     |   |   |   |   |   |   |   |   |   |
| (GS, 1988)                                                                                                                                                                                                        |                       |   |   | X |   |   |   |   |   |   |
| (Gupta et al., 2021)                                                                                                                                                                                              | X                     |   |   |   |   |   |   |   |   |   |
| (Gutterman et al., 2013)                                                                                                                                                                                          |                       | X |   |   |   |   |   |   |   |   |
| (HA, 1992)                                                                                                                                                                                                        |                       | X |   |   |   |   |   |   |   |   |
| (Hamnerius et al., 2021)                                                                                                                                                                                          |                       |   | X |   |   |   |   |   |   |   |
| (Hamnerius, Svedman, Bergendorff, Björk, Bruze, Engfeldt, et al., 2018)                                                                                                                                           |                       |   | X |   |   |   |   |   |   |   |
| (Hamnerius, Svedman, Bergendorff, Björk, Bruze, & Pontén, 2018)                                                                                                                                                   |                       | X |   |   |   |   |   |   |   |   |
| (A. A. Han et al., 2022)                                                                                                                                                                                          |                       | X |   |   |   |   |   |   |   |   |
| (J. H. Han et al., 2015)                                                                                                                                                                                          |                       |   |   | X |   |   |   |   |   |   |
| (Hatt et al., 2020)                                                                                                                                                                                               | X                     |   |   |   |   |   |   |   |   |   |
| (Haufroid et al., 2007)                                                                                                                                                                                           | X                     |   |   |   |   |   |   |   |   |   |
| (Hautemanière et al., 2013)                                                                                                                                                                                       | X                     |   |   |   |   |   |   |   |   |   |
| (Hawley et al., 2016)                                                                                                                                                                                             |                       |   |   | X |   |   |   |   |   |   |
| (Heibati et al., 2022)                                                                                                                                                                                            |                       |   | X |   |   |   |   |   |   |   |

| Reference<br>(o = outcome, i = intervention, p = population, d = design, b = background article, t = publication type, l = language, u = Update available, r = only research protocol, n = reports not retrieved) | Reasons for exclusion |   |   |   |   |   |   |   |   |   |
|-------------------------------------------------------------------------------------------------------------------------------------------------------------------------------------------------------------------|-----------------------|---|---|---|---|---|---|---|---|---|
|                                                                                                                                                                                                                   | o                     | i | p | d | b | t | l | u | r | n |
| (Held et al., 2002)                                                                                                                                                                                               |                       |   | X |   |   |   |   |   |   |   |
| (Hell & Pauser, 2007)                                                                                                                                                                                             |                       |   |   | X |   |   |   |   |   |   |
| (Henn et al., 2015)                                                                                                                                                                                               | X                     |   |   |   |   |   |   |   |   |   |
| (Hetzmann et al., 2021)                                                                                                                                                                                           |                       | X |   |   |   |   |   |   |   |   |
| (HG et al., 2023)                                                                                                                                                                                                 |                       |   | X |   |   |   |   |   |   |   |
| (HH, 1971)                                                                                                                                                                                                        |                       |   |   |   |   |   |   |   |   | X |
| (HH et al., 2021)                                                                                                                                                                                                 |                       |   | X |   |   |   |   |   |   |   |
| (Hildre et al., 2023)                                                                                                                                                                                             |                       |   | X |   |   |   |   |   |   |   |
| (HK et al., 2023)                                                                                                                                                                                                 |                       | X |   |   |   |   |   |   |   |   |
| (Holtjer et al., 2023)                                                                                                                                                                                            |                       |   | X |   |   |   |   |   |   |   |
| (Homyer & Mehendale, 2023)                                                                                                                                                                                        | X                     |   |   |   |   |   |   |   |   |   |
| (Houben et al., 2006)                                                                                                                                                                                             |                       | X |   |   |   |   |   |   |   |   |
| (Huang et al., 2023)                                                                                                                                                                                              | X                     |   |   |   |   |   |   |   |   |   |
| (IA et al., 1995)                                                                                                                                                                                                 |                       |   | X |   |   |   |   |   |   |   |
| (Ilyas et al., 2020)                                                                                                                                                                                              |                       |   |   | X |   |   |   |   |   |   |
| (Ishihara et al., 2020)                                                                                                                                                                                           | X                     |   |   |   |   |   |   |   |   |   |
| (Ituen et al., 2021)                                                                                                                                                                                              |                       |   |   | X |   |   |   |   |   |   |
| (JA et al., 2021)                                                                                                                                                                                                 |                       |   | X |   |   |   |   |   |   |   |
| (Jacobsen et al., 2022)                                                                                                                                                                                           |                       |   | X |   |   |   |   |   |   |   |
| (Jann et al., 2021)                                                                                                                                                                                               | X                     |   |   |   |   |   |   |   |   |   |
| (JD et al., 2008)                                                                                                                                                                                                 |                       |   | X |   |   |   |   |   |   |   |
| (JE et al., 1990)                                                                                                                                                                                                 |                       |   | X |   |   |   |   |   |   |   |
| (L. JM et al., 2022)                                                                                                                                                                                              | X                     |   |   |   |   |   |   |   |   |   |
| (M. JM & DN, 2016)                                                                                                                                                                                                |                       | X |   |   |   |   |   |   |   |   |
| (Jonsdottir et al., 2023)                                                                                                                                                                                         |                       |   | X |   |   |   |   |   |   |   |
| (JP et al., 1984)                                                                                                                                                                                                 | X                     |   |   |   |   |   |   |   |   |   |
| (JS et al., 2020)                                                                                                                                                                                                 | X                     |   |   |   |   |   |   |   |   |   |
| (JW et al., 1983)                                                                                                                                                                                                 |                       |   |   |   |   |   |   |   |   | X |
| (KA et al., 2021)                                                                                                                                                                                                 | X                     |   |   |   |   |   |   |   |   |   |
| (Kampf, 2008)                                                                                                                                                                                                     |                       |   |   | X |   |   |   |   |   |   |





| (Lodola et al., 2000)                                                                                                                                                                                             |                       | X |   |   |   |   |   |   |   |   |
|-------------------------------------------------------------------------------------------------------------------------------------------------------------------------------------------------------------------|-----------------------|---|---|---|---|---|---|---|---|---|
| Reference<br>(o = outcome, i = intervention, p = population, d = design, b = background article, t = publication type, l = language, u = Update available, r = only research protocol, n = reports not retrieved) | Reasons for exclusion |   |   |   |   |   |   |   |   |   |
|                                                                                                                                                                                                                   | o                     | i | p | d | b | t | l | u | r | n |
| (Lu et al., 2022)                                                                                                                                                                                                 | X                     |   |   |   |   |   |   |   |   |   |
| (Lu et al., 2023)                                                                                                                                                                                                 | X                     |   |   |   |   |   |   |   |   |   |
| (Luchini et al., 2021)                                                                                                                                                                                            |                       |   | X |   |   |   |   |   |   |   |
| ( da S. MA et al., 1997)                                                                                                                                                                                          | X                     |   |   |   |   |   |   |   |   |   |
| (G. J. MA et al., 2013)                                                                                                                                                                                           |                       |   |   |   |   |   |   |   | X |   |
| (Maier et al., 2015)                                                                                                                                                                                              | X                     |   |   |   |   |   |   |   |   |   |
| (Małaszuk et al., 2000)                                                                                                                                                                                           |                       |   |   |   |   |   |   |   |   | X |
| (Mallakpour et al., 2021)                                                                                                                                                                                         |                       | X |   |   |   |   |   |   |   |   |
| (Manyele et al., 2008)                                                                                                                                                                                            |                       | X |   |   |   |   |   |   |   |   |
| (Marena et al., 2002)                                                                                                                                                                                             | X                     |   |   |   |   |   |   |   |   |   |
| (Matulonga et al., 2016)                                                                                                                                                                                          |                       |   | X |   |   |   |   |   |   |   |
| (McKinley et al., 2023)                                                                                                                                                                                           | X                     |   |   |   |   |   |   |   |   |   |
| (Melgar et al., 2022)                                                                                                                                                                                             | X                     |   |   |   |   |   |   |   |   |   |
| (Mirabelli et al., 2007)                                                                                                                                                                                          | X                     |   |   |   |   |   |   |   |   |   |
| (Moccia et al., 2020)                                                                                                                                                                                             | X                     |   |   |   |   |   |   |   |   |   |
| (Mohite et al., 2022)                                                                                                                                                                                             |                       | X |   |   |   |   |   |   |   |   |
| (Mohtar et al., 2021)                                                                                                                                                                                             | X                     |   |   |   |   |   |   |   |   |   |
| (Molin et al., 2015)                                                                                                                                                                                              |                       | X |   |   |   |   |   |   |   |   |
| (MS et al., 2006)                                                                                                                                                                                                 | X                     |   |   |   |   |   |   |   |   |   |
| (Mungan et al., 2019)                                                                                                                                                                                             |                       |   | X |   |   |   |   |   |   |   |
| (Munyendo & Kiprop, 2016)                                                                                                                                                                                         |                       | X |   |   |   |   |   |   |   |   |
| (MV et al., 2008)                                                                                                                                                                                                 |                       |   | X |   |   |   |   |   |   |   |
| (Mwanga et al., 2022)                                                                                                                                                                                             | X                     |   |   |   |   |   |   |   |   |   |
| (Nakamura et al., 2020)                                                                                                                                                                                           | X                     |   |   |   |   |   |   |   |   |   |
| (Navarathna et al., 2023)                                                                                                                                                                                         |                       | X |   |   |   |   |   |   |   |   |
| (Nemli et al., 2021)                                                                                                                                                                                              |                       |   |   | X |   |   |   |   |   |   |
| (Neves et al., 2021)                                                                                                                                                                                              |                       | X |   |   |   |   |   |   |   |   |
| (Nguyen et al., 2021)                                                                                                                                                                                             |                       |   |   | X |   |   |   |   |   |   |
| (Nielsen & Bach, 1999)                                                                                                                                                                                            |                       |   | X |   |   |   |   |   |   |   |





|                                                                                                                                                                                                                   |                       |   |   |   |   |   |   |   |   |   |
|-------------------------------------------------------------------------------------------------------------------------------------------------------------------------------------------------------------------|-----------------------|---|---|---|---|---|---|---|---|---|
| (Sedeh et al., 2023)                                                                                                                                                                                              |                       | X |   |   |   |   |   |   |   |   |
| Reference<br>(o = outcome, i = intervention, p = population, d = design, b = background article, t = publication type, l = language, u = Update available, r = only research protocol, n = reports not retrieved) | Reasons for exclusion |   |   |   |   |   |   |   |   |   |
|                                                                                                                                                                                                                   | o                     | i | p | d | b | t | l | u | r | n |
| (Seifi & Reza Kamali, 2021)                                                                                                                                                                                       | X                     |   |   |   |   |   |   |   |   |   |
| (Sellaoui et al., 2021)                                                                                                                                                                                           | X                     |   |   |   |   |   |   |   |   |   |
| (Shepherd et al., 2020)                                                                                                                                                                                           |                       | X |   |   |   |   |   |   |   |   |
| (Sher & Mulder, 2020)                                                                                                                                                                                             | X                     |   |   |   |   |   |   |   |   |   |
| (Shi et al., 2022)                                                                                                                                                                                                |                       | X |   |   |   |   |   |   |   |   |
| (Si et al., 2018)                                                                                                                                                                                                 | X                     |   |   |   |   |   |   |   |   |   |
| (Siani & Maillard, 2015)                                                                                                                                                                                          |                       |   |   | X |   |   |   |   |   |   |
| (Siani et al., 2018)                                                                                                                                                                                              | X                     |   |   |   |   |   |   |   |   |   |
| (S. E. Simmons et al., 2021)                                                                                                                                                                                      | X                     |   |   |   |   |   |   |   |   |   |
| (S. Simmons et al., 2021)                                                                                                                                                                                         | X                     |   |   |   |   |   |   |   |   |   |
| (Singgih et al., 1986)                                                                                                                                                                                            |                       | X |   |   |   |   |   |   |   |   |
| (Sit et al., 2021)                                                                                                                                                                                                |                       |   | X |   |   |   |   |   |   |   |
| (Sit et al., 2022)                                                                                                                                                                                                |                       | X |   |   |   |   |   |   |   |   |
| (SJ et al., 2015)                                                                                                                                                                                                 |                       | X |   |   |   |   |   |   |   |   |
| (SJ et al., 2013)                                                                                                                                                                                                 |                       |   | X |   |   |   |   |   |   |   |
| (Society of Gastroenterology Nurses and Associates, 1996)                                                                                                                                                         |                       |   |   |   | X |   |   |   |   |   |
| (Sunday et al., 2023)                                                                                                                                                                                             |                       |   | X |   |   |   |   |   |   |   |
| (Song et al., 2019)                                                                                                                                                                                               |                       |   |   | X |   |   |   |   |   |   |
| (Spencer et al., 2017)                                                                                                                                                                                            |                       | X |   |   |   |   |   |   |   |   |
| (Starke et al., 2021)                                                                                                                                                                                             |                       |   |   | X |   |   |   |   |   |   |
| (Steege et al., 2014)                                                                                                                                                                                             |                       |   | X |   |   |   |   |   |   |   |
| (Stjärne Aspelund et al., 2016)                                                                                                                                                                                   | X                     |   |   |   |   |   |   |   |   |   |
| (Stoeva et al., 2020)                                                                                                                                                                                             |                       | X |   |   |   |   |   |   |   |   |
| (F.-C. Su et al., 2018)                                                                                                                                                                                           | X                     |   |   |   |   |   |   |   |   |   |
| (Takigawa & Endo, 2006)                                                                                                                                                                                           |                       |   |   | X |   |   |   |   |   |   |
| (Tang et al., 2023)                                                                                                                                                                                               | X                     |   |   |   |   |   |   |   |   |   |
| (Tasar et al., 2021)                                                                                                                                                                                              |                       |   | X |   |   |   |   |   |   |   |
| (Teska et al., 2022)                                                                                                                                                                                              | X                     |   |   |   |   |   |   |   |   |   |
| (TL, 1987)                                                                                                                                                                                                        |                       |   |   |   | X |   |   |   |   |   |

|                                                                                                                                                                                                                   |                       |   |   |   |   |   |   |   |   |   |
|-------------------------------------------------------------------------------------------------------------------------------------------------------------------------------------------------------------------|-----------------------|---|---|---|---|---|---|---|---|---|
| (Tofanelli et al., 2020)                                                                                                                                                                                          | X                     |   |   |   |   |   |   |   |   |   |
| (Tomb et al., 2018)                                                                                                                                                                                               | X                     |   |   |   |   |   |   |   |   |   |
| Reference<br>(o = outcome, i = intervention, p = population, d = design, b = background article, t = publication type, l = language, u = Update available, r = only research protocol, n = reports not retrieved) | Reasons for exclusion |   |   |   |   |   |   |   |   |   |
|                                                                                                                                                                                                                   | o                     | i | p | d | b | t | l | u | r | n |
| (Tyski et al., 2022)                                                                                                                                                                                              |                       |   |   | X |   |   |   |   |   |   |
| (Tyski et al., 2021)                                                                                                                                                                                              | X                     |   |   |   |   |   |   |   |   |   |
| (Vaidya et al., 2020)                                                                                                                                                                                             |                       | X |   |   |   |   |   |   |   |   |
| (van den Berg et al., 2021)                                                                                                                                                                                       |                       | X |   |   |   |   |   |   |   |   |
| (VC et al., 2003)                                                                                                                                                                                                 |                       | X |   |   |   |   |   |   |   |   |
| (Versoza et al., 2020)                                                                                                                                                                                            | X                     |   |   |   |   |   |   |   |   |   |
| (Vincent et al., 2017)                                                                                                                                                                                            | X                     |   |   |   |   |   |   |   |   |   |
| (Vizcaya et al., 2013)                                                                                                                                                                                            |                       | X |   |   |   |   |   |   |   |   |
| (Walton & Rogers, 2017)                                                                                                                                                                                           |                       |   |   | X |   |   |   |   |   |   |
| (Watanabe et al., 2014)                                                                                                                                                                                           | X                     |   |   |   |   |   |   |   |   |   |
| (WB et al., 1985)                                                                                                                                                                                                 |                       |   |   |   |   |   |   |   |   |   |
| (Weber et al., 2016)                                                                                                                                                                                              | X                     |   |   |   |   |   |   |   |   |   |
| (Weber et al., 2019)                                                                                                                                                                                              |                       |   |   | X |   |   |   |   |   |   |
| (Whitworth et al., 2020)                                                                                                                                                                                          |                       |   | X |   |   |   |   |   |   |   |
| (Wilson et al., 2022)                                                                                                                                                                                             |                       | X |   |   |   |   |   |   |   |   |
| (Wilson et al., 2023a)                                                                                                                                                                                            |                       |   |   | X |   |   |   |   |   |   |
| (Wilson et al., 2023b)                                                                                                                                                                                            |                       |   | X |   |   |   |   |   |   |   |
| (Wiszniewska & Walusiak-Skorupa, 2014)                                                                                                                                                                            |                       |   |   |   |   |   |   |   |   | X |
| (WJ et al., 1990)                                                                                                                                                                                                 |                       |   |   |   | X |   |   |   |   |   |
| (Wright et al., 2023)                                                                                                                                                                                             | X                     |   |   |   |   |   |   |   |   |   |
| (Xie et al., 2021)                                                                                                                                                                                                | X                     |   |   |   |   |   |   |   |   |   |
| (Yang et al., 2017)                                                                                                                                                                                               | X                     |   |   |   |   |   |   |   |   |   |
| (Yanke et al., 2021)                                                                                                                                                                                              |                       | X |   |   |   |   |   |   |   |   |
| (Ye et al., 2020)                                                                                                                                                                                                 |                       |   | X |   |   |   |   |   |   |   |
| (Youssef et al., 2023)                                                                                                                                                                                            |                       |   | X |   |   |   |   |   |   |   |
| (Yüksel, Nørreslet, et al., 2022)                                                                                                                                                                                 |                       | X |   |   |   |   |   |   |   |   |
| (Yüksel, Sonne, et al., 2022)                                                                                                                                                                                     |                       |   | X |   |   |   |   |   |   |   |
| (Zahrallayali et al., 2021)                                                                                                                                                                                       |                       |   | X |   |   |   |   |   |   |   |

(Zhang et al., 2023)

|  |  |   |  |  |  |  |  |  |  |  |
|--|--|---|--|--|--|--|--|--|--|--|
|  |  | X |  |  |  |  |  |  |  |  |
|--|--|---|--|--|--|--|--|--|--|--|

**Table S7. Risk of bias assessment for included studies**

| Study                   | Major domains                       |                                     |                               |             |                 |            | Minor domains     |         |                      | OVERALL |
|-------------------------|-------------------------------------|-------------------------------------|-------------------------------|-------------|-----------------|------------|-------------------|---------|----------------------|---------|
|                         | Recruitment procedure and follow-up | Exposure definition and measurement | Outcome source and validation | Confounding | Analysis method | Chronology | Assessor blinding | Funding | Conflict of interest |         |
| (Blackley et al., 2023) | ✓                                   | ✓                                   | ✓                             | ✓           | ✓               | ✓          | ✓                 | ✓       | ✓                    | ✓       |
| (Caridi et al., 2019)   | ✓                                   | ✓                                   | ✗                             | ✓           | ✓               | ✓          | ⚠                 | ✓       | ✓                    | ✗       |
| (Casey et al., 2017)    | ✗                                   | ✗                                   | ✗                             | ✗           | ✓               | ✓          | ⚠                 | ✓       | ✓                    | ✗       |
| (Chang et al., 2018)    | ⚠                                   | ✓                                   | ✓                             | ✗           | ⚠               | ✓          | ✗                 | ✓       | ✓                    | ✗       |
| (Dalton et al., 2023)   | ⚠                                   | ✓                                   | ✓                             | ✓           | ✓               | ✓          | ✓                 | ✓       | ✓                    | ✓       |
| (Ding et al., 2021)     | ✓                                   | ✓                                   | ✗                             | ✓           | ✓               | ✗          | ✗                 | ✓       | ✓                    | ✗       |
| (Dumas et al., 2012)    | ✓                                   | ✓                                   | ✗                             | ✓           | ✓               | ✓          | ✓                 | ✓       | ✓                    | ✗       |
| (Dumas et al., 2020)    | ✓                                   | ✗                                   | ✗                             | ✗           | ✓               | ✓          | ⚠                 | ✓       | ✓                    | ✗       |
| (Dumas, et al., 2021)   | ✓                                   | ✓                                   | ✗                             | ✗           | ✓               | ✓          | ⚠                 | ✓       | ✓                    | ✗       |
| (Dumas, et al., 2017)   | ✓                                   | ✓                                   | ✗                             | ✓           | ✓               | ✓          | ⚠                 | ✓       | ✓                    | ✗       |
| (Estrin et al., 1987)   | ⚠                                   | ✗                                   | ✓                             | ✓           | ✓               | ✓          | ⚠                 | ✓       | ✓                    | ✗       |
| (Gannon et al., 1995)   | ✗                                   | ✗                                   | ✗                             | ✗           | ✗               | ✗          | ⚠                 | ⚠       | ⚠                    | ✗       |
| (Garrido et al., 2022)  | ✓                                   | ✗                                   | ✗                             | ✗           | ✓               | ✓          | ⚠                 | ✓       | ✓                    | ✗       |
| (Gaskins et al., 2017)  | ✓                                   | ✗                                   | ✗                             | ✓           | ✓               | ✓          | ⚠                 | ✓       | ✓                    | ✗       |
| (Gonzalez et al., 2014) | ✓                                   | ✗                                   | ✗                             | ✗           | ✗               | ✓          | ⚠                 | ✓       | ✓                    | ✗       |
| (Hawley et al., 2018)   | ✓                                   | ✓                                   | ✓                             | ✓           | ✓               | ✓          | ⚠                 | ✓       | ✓                    | ✓       |
| (Kobos et al., 2022)    | ✓                                   | ✗                                   | ✗                             | ✓           | ✓               | ✓          | ⚠                 | ✓       | ✓                    | ✗       |

|                                 |   |   |   |   |   |   |   |   |   |   |
|---------------------------------|---|---|---|---|---|---|---|---|---|---|
| (Kurth et al., 2017)            | ✓ | ✗ | ✗ | ✓ | ✓ | ✓ | ⚠ | ✓ | ✓ | ✗ |
| (Laborde-Castérot et al., 2012) | ✗ | ✗ | ✓ | ✗ | ✗ | ✗ | ⚠ | ✓ | ✓ | ✗ |
| (Lee et al., 2014)              | ✓ | ✗ | ✗ | ✓ | ✓ | ✓ | ⚠ | ✓ | ✓ | ✗ |
| (Mac Hovcová et al., 2013)      | ✓ | ✓ | ✗ | ✓ | ✓ | ✗ | ✗ | ✓ | ✓ | ✗ |
| (Mehtar et al., 2016)           | ✓ | ✗ | ✗ | ✓ | ✓ | ✓ | ⚠ | ✓ | ✓ | ✗ |
| (Mwanga et al., 2023)           | ✓ | ✓ | ✓ | ✓ | ✓ | ✓ | ⚠ | ✓ | ✓ | ✓ |
| (Nayebzadeh, 2007)              | ✗ | ✓ | ✗ | ✓ | ✓ | ✓ | ✓ | ⚠ | ⚠ | ✗ |
| (Ndlela & Naidoo, 2023)         | ✓ | ✓ | ✓ | ✓ | ✓ | ✓ | ✓ | ✓ | ✓ | ✓ |
| (Nettis et al., 2002)           | ✓ | ✗ | ✓ | ✓ | ✓ | ✓ | ⚠ | ✓ | ✓ | ✗ |
| (Norbäck, 1988)                 | ✓ | ✓ | ✓ | ✓ | ✓ | ✓ | ✓ | ✓ | ✓ | ✓ |
| (Otterspoor & Farrell, 2019)    | ✗ | ✗ | ⚠ | ✗ | ✗ | ✗ | ⚠ | ⚠ | ✓ | ✗ |
| (Patel et al., 2023)            | ✓ | ✓ | ✓ | ✓ | ✓ | ✓ | ✓ | ✓ | ✓ | ✓ |
| (F. C. Su et al., 2019)         | ✓ | ✗ | ✓ | ✓ | ✓ | ✓ | ⚠ | ✓ | ✓ | ✗ |

 Low risk; 
  Unclear; 
  High risk; 
  Not applicable



**Table S8. Studies excluded from the meta-analysis and reasons for exclusion**

| Intervention/Exposure assessed | Study excluded from meta-analysis | Reason for exclusion                                                                                                             |
|--------------------------------|-----------------------------------|----------------------------------------------------------------------------------------------------------------------------------|
| Chlorine-based products        | (Mehtar et al., 2016)             | Not comparable exposure. It assessed direct spraying of chlorine on healthcare workers rather than environmental exposure alone. |
|                                | (Dumas et al., 2020)              | Not comparable outcome (the study estimated adjusted hazard ratio instead of odds ratio)                                         |
|                                | (Kobos et al., 2022)              | Not comparable outcome (skin disorder was quantified instead of respiratory conditions)                                          |
| Glutaraldehyde                 | (Dumas et al., 2020)              | Not comparable outcome (the study estimated adjusted hazard ratio instead of odds ratio)                                         |
|                                | (Dumas, Gaskins, et al., 2021)    | Not comparable outcome (the study estimated adjusted hazard ratio instead of odds ratio)                                         |
|                                | (Gannon et al., 1995)             | Not comparable outcome (the study estimated prevalence instead of odds ratio)                                                    |
|                                | (Nayebzadeh, 2007)                | Not comparable exposure. It assessed the effect of indoor ventilation on glutaraldehyde concentration in air                     |
|                                | (Norbäck, 1988)                   | Not comparable outcome (the study estimated prevalence instead of odds ratio)                                                    |
| QACs                           | (Dumas et al., 2020)              | Not comparable outcome (the study estimated adjusted hazard ratio instead of odds ratio)                                         |
|                                | (Kobos et al., 2022)              | Not comparable outcome (FeNO levels were quantified as proxy for respiratory conditions)                                         |

|                            |                       |                                                                                                                                  |
|----------------------------|-----------------------|----------------------------------------------------------------------------------------------------------------------------------|
|                            | (Mwanga et al., 2023) | Not comparable outcome (skin disorder was quantified instead of respiratory conditions)                                          |
| Use of spray               | (Mehtar et al., 2016) | Not comparable exposure. It assessed direct spraying of chlorine on healthcare workers rather than environmental exposure alone. |
| General disinfection tasks | (Kurth et al., 2017)  | Not comparable outcome (the study estimated prevalence ratio instead of odds ratio)                                              |
|                            |                       |                                                                                                                                  |

**Table S9. Funnel plots**

Funnel plots depicting the relationship between the odds ratios and their standard errors for studies examining the effect of different disinfectant application methods on respiratory conditions. The vertical line represents the overall effect estimate, while the diagonal lines indicate the expected 95% confidence intervals.

**Chlorine-based product**

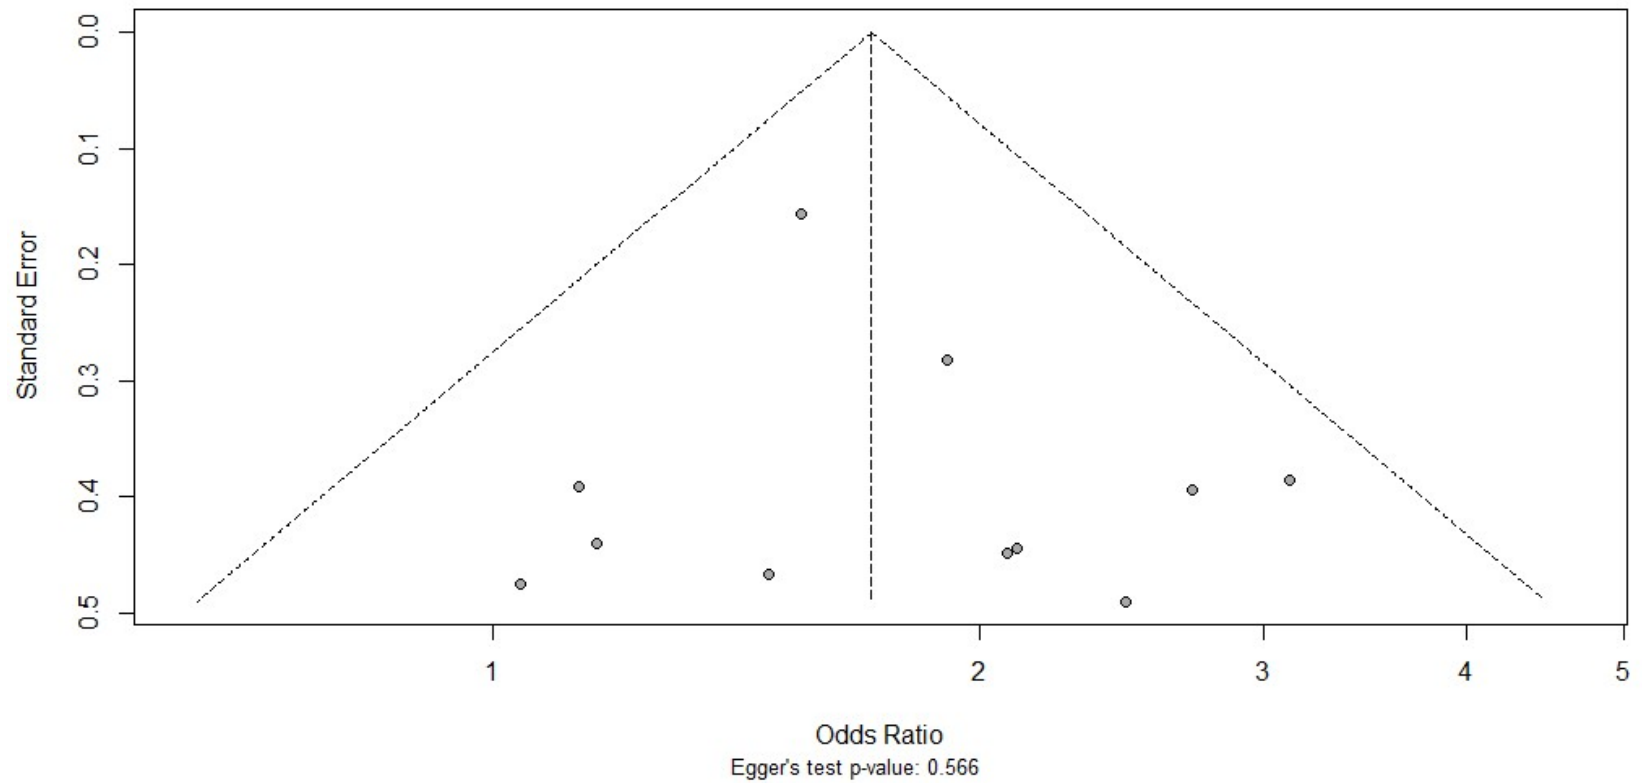

# Glutaraldehyde

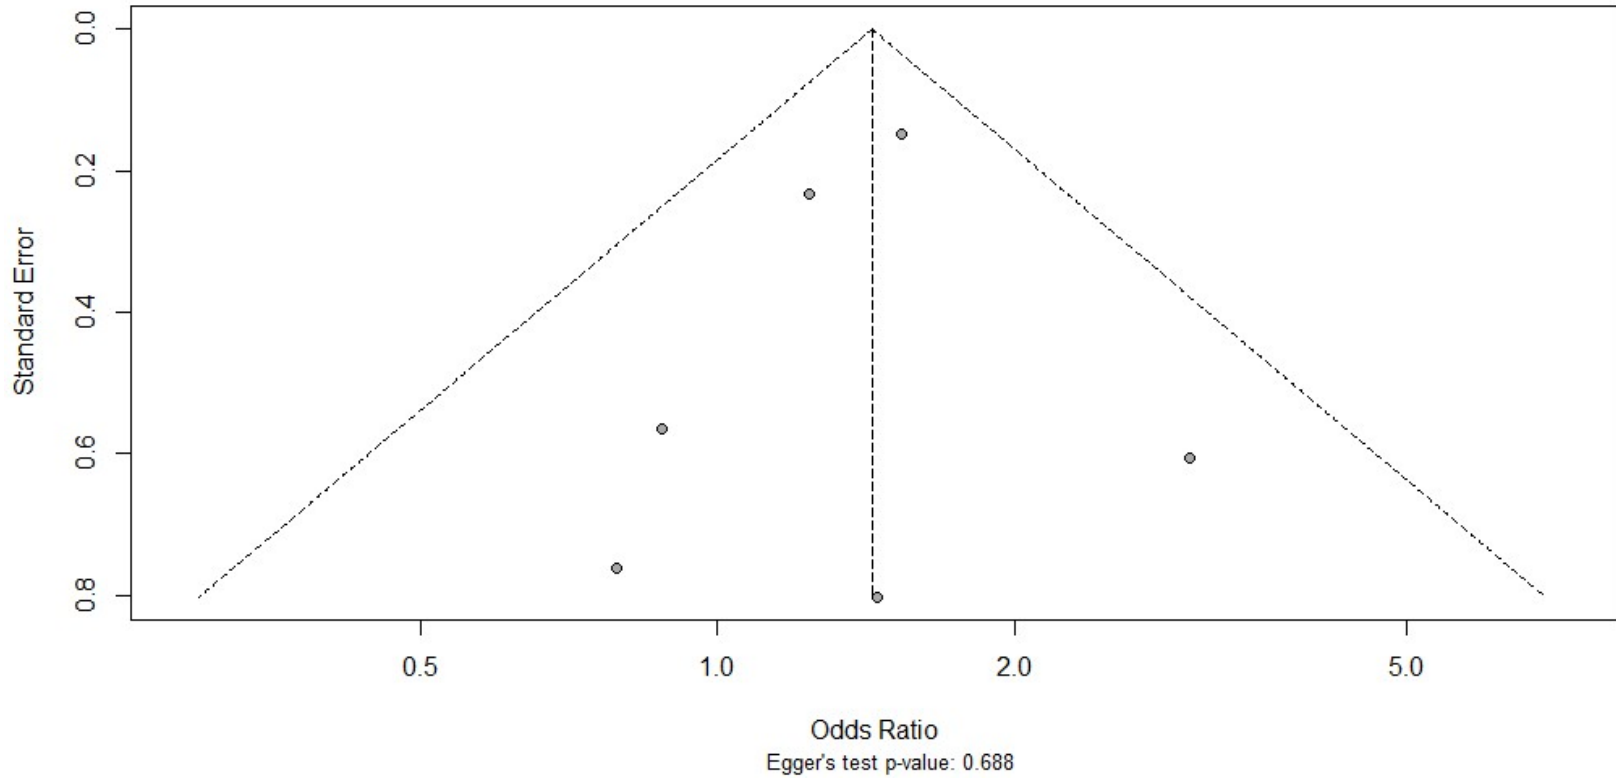

### Quaternary Ammonium Compounds

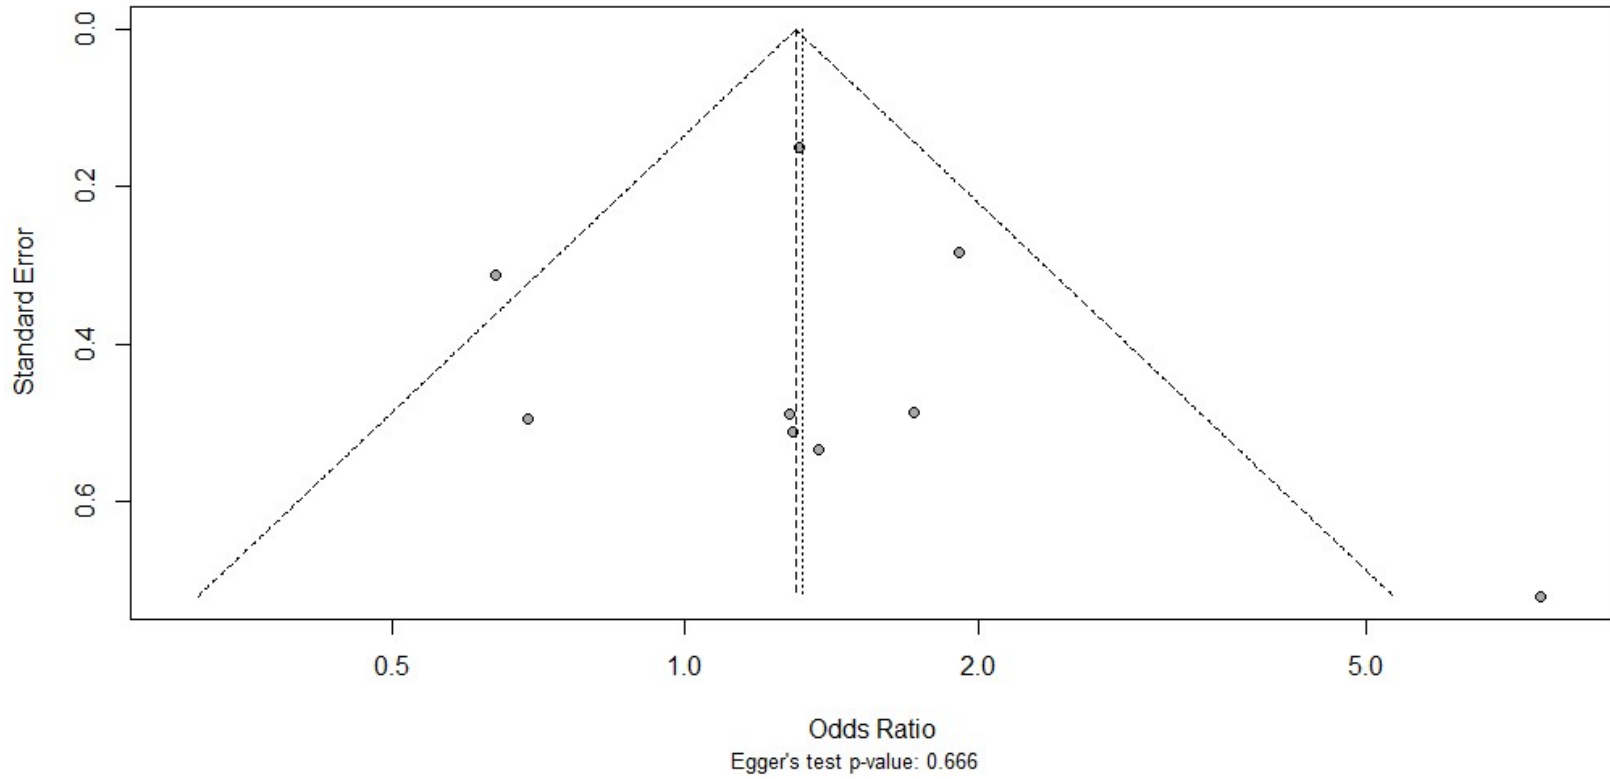

### Use of spray

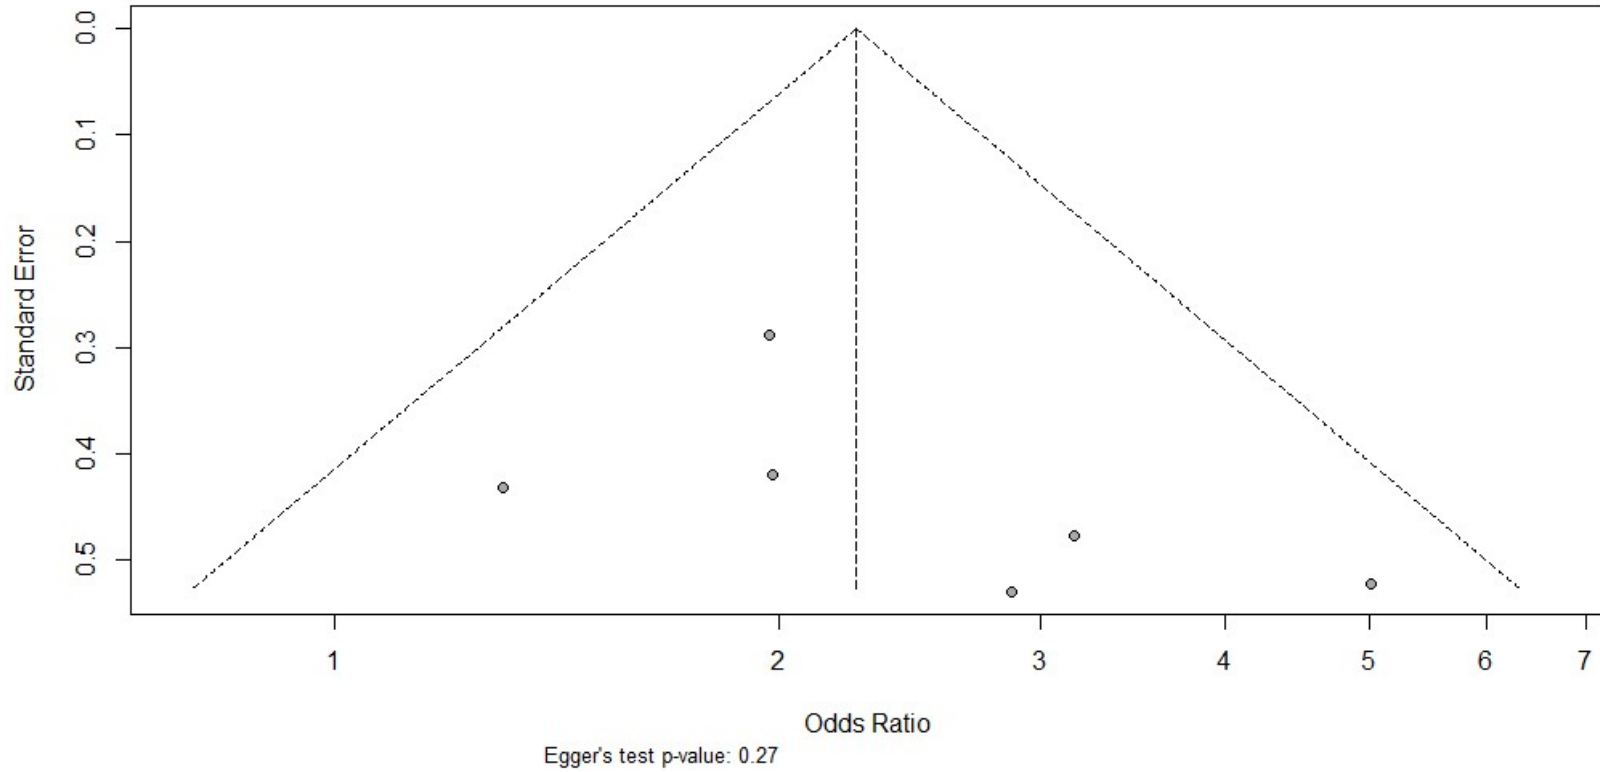

### General disinfection tasks

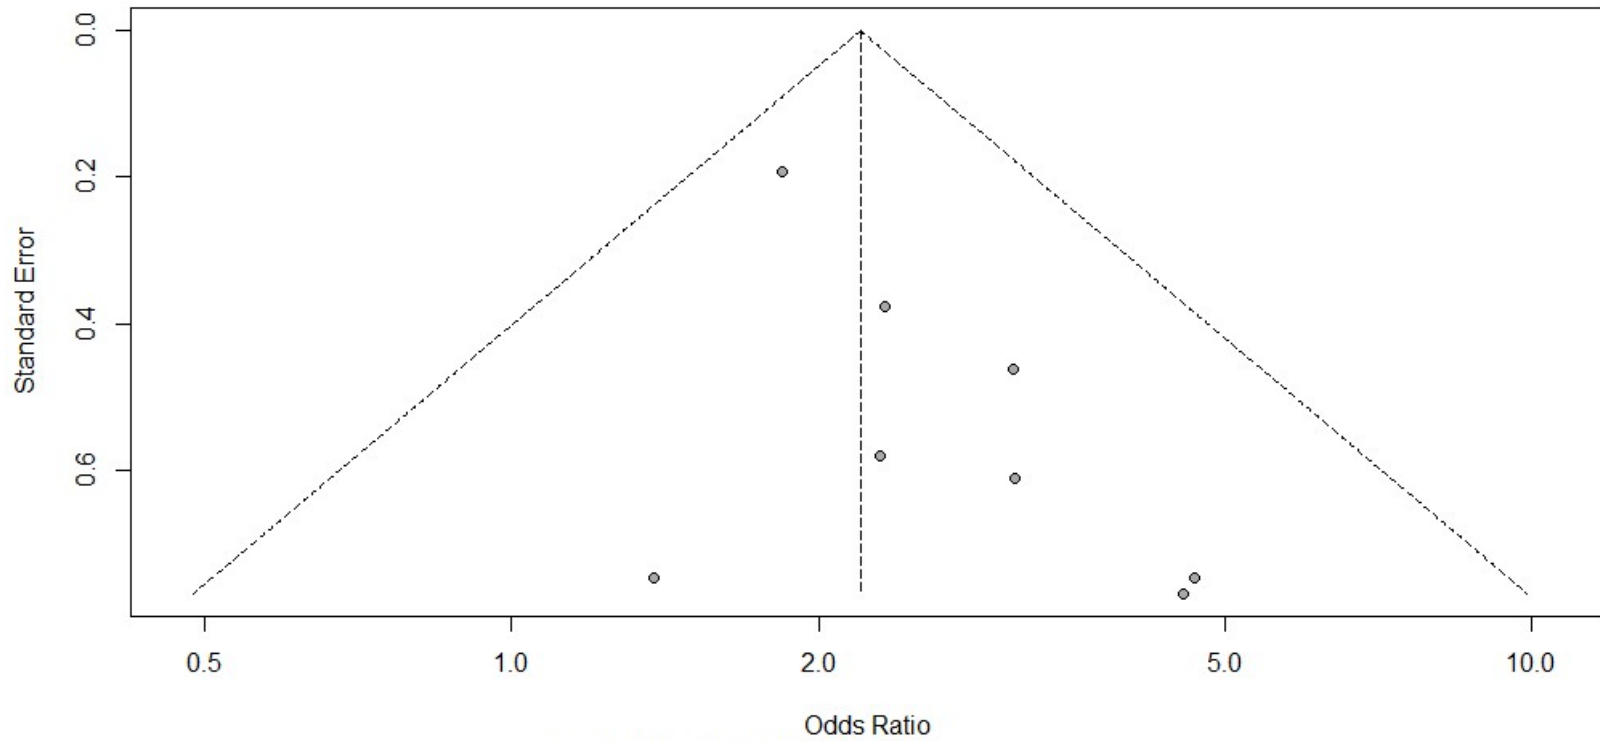

Egger's test p-value: 0.0567

**Table S10. Meta-regression results**

| <b>Chlorine-Based Product</b>           |              |                |              |             |              |             |
|-----------------------------------------|--------------|----------------|--------------|-------------|--------------|-------------|
| Term                                    | Estimate     | Standard error | Z-value      | P-value     | CI-low       | CI-high     |
| Interceptor                             | 0.899542361  | 0.533658667    | 1.685613702  | 0.091870228 | -0.146409406 | 1.945494128 |
| Cohort study                            | -0.208983712 | 0.601206218    | -0.347607369 | 0.728135071 | -1.387326247 | 0.969358823 |
| Cross-sectional                         | -0.472434729 | 0.565937523    | -0.83478248  | 0.403840192 | -1.581651891 | 0.636782434 |
| Sample size                             | 2.01625E-06  | 0.000170671    | 0.011813671  | 0.990574274 | -0.000332493 | 0.000336525 |
| <b>Glutaraldehyde</b>                   |              |                |              |             |              |             |
| Interceptor                             | 0.646345117  | 0.562761884    | 1.148523266  | 0.250752614 | -0.456647907 | 1.749338141 |
| Cross-sectional                         | -0.23242841  | 0.333461942    | -0.697016303 | 0.485792591 | -0.886001807 | 0.421144987 |
| Sample size                             | -9.78398E-05 | 0.000236422    | -0.413836307 | 0.678993993 | -0.000561217 | 0.000365538 |
| <b>QACs</b>                             |              |                |              |             |              |             |
| Cross-sectional                         | NA           | NA             | NA           | NA          | NA           | NA          |
| Interceptor*                            | 0.341209601  | 0.3298921      | 1.034306676  | 0.300992817 | -0.305367033 | 0.987786236 |
| Sample size                             | -2.73782E-05 | 0.000139854    | -0.195762986 | 0.844795682 | -0.000301487 | 0.000246731 |
| <b>Use of spray</b>                     |              |                |              |             |              |             |
| Interceptor                             | 1.11053465   | 0.645399991    | 1.720692077  | 0.085306715 | -0.154426087 | 2.375495387 |
| Cross-sectional                         | -0.217259761 | 0.666291779    | -0.326073002 | 0.744369123 | -1.52316765  | 1.088648129 |
| Sample size                             | -7.76556E-05 | 0.000249054    | -0.311802051 | 0.755190965 | -0.000565792 | 0.000410481 |
| <b>General Disinfection Tasks (GDT)</b> |              |                |              |             |              |             |
| Interceptor                             | 1.044237549  | 0.408096836    | 2.558798444  | 0.010503462 | 0.244382448  | 1.84409265  |
| Cross-sectional                         | 0.200128937  | 0.454762923    | 0.440073117  | 0.659884152 | -0.691190014 | 1.091447888 |



|                                                                                                  |              |           |              |             |              |             |
|--------------------------------------------------------------------------------------------------|--------------|-----------|--------------|-------------|--------------|-------------|
| Sample size                                                                                      | -0.000279931 | 0.0002168 | -1.291198793 | 0.196634754 | -0.000704851 | 0.000144988 |
| *Only sample size was included as moderator as all included studies were cross-sectional studies |              |           |              |             |              |             |

**Table S11. Leave-one-out analysis results**

Forest plots showing the odds ratios (OR) with 95% confidence intervals (CI) for respiratory conditions associated with different disinfectants and application methods exposure after omitting individual studies. The square shapes represent the individual results. The diamond shape represents the overall effect estimate from the common effect model.

**Leave-one-out chlorine-based products**

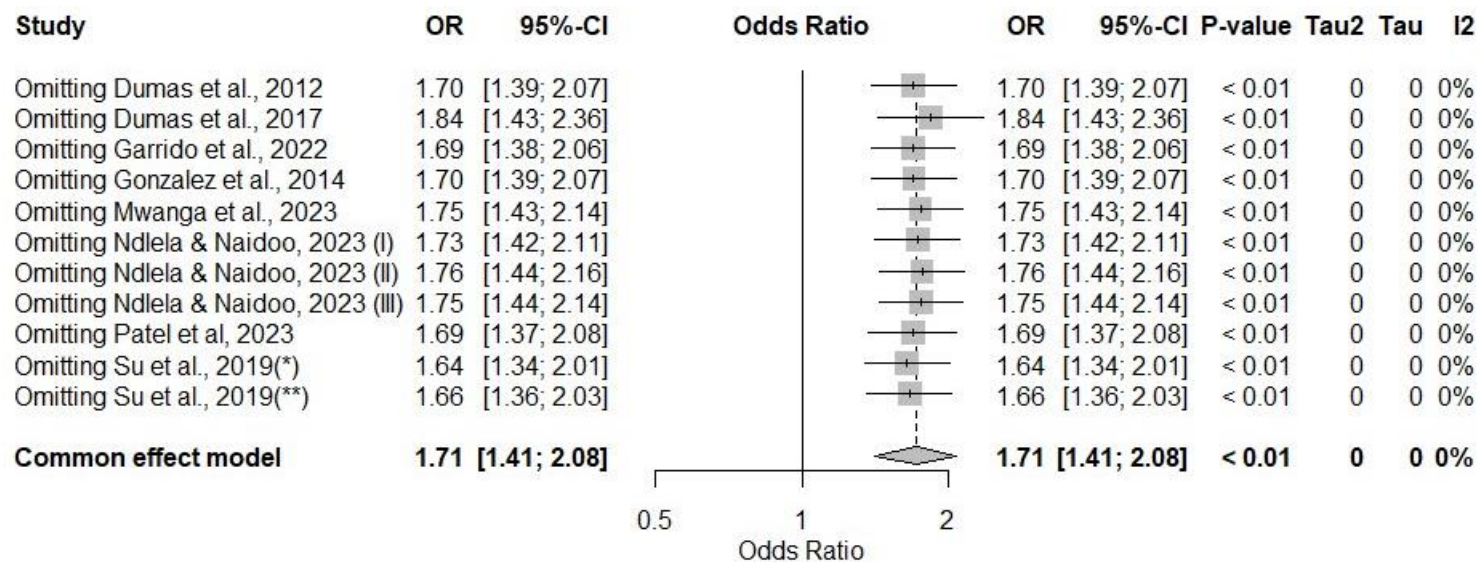

### Leave-one-out glutaraldehyde

| Study                             | OR          | 95%-CI              | Odds Ratio | OR          | 95%-CI              | P-value          | Tau2     | Tau      | I2        |
|-----------------------------------|-------------|---------------------|------------|-------------|---------------------|------------------|----------|----------|-----------|
| Omitting Dumas et al., 2017       | 1.28        | [0.88; 1.86]        |            | 1.28        | [0.88; 1.86]        | 0.20             | 0        | 0        | 0%        |
| Omitting Mwanga et al., 2023(*)   | 1.47        | [1.16; 1.86]        |            | 1.47        | [1.16; 1.86]        | < 0.01           | 0        | 0        | 0%        |
| Omitting Mwanga et al., 2023 (**) | 1.46        | [1.15; 1.84]        |            | 1.46        | [1.15; 1.84]        | < 0.01           | 0        | 0        | 0%        |
| Omitting Mwanga et al., 2023(***) | 1.43        | [1.14; 1.81]        |            | 1.43        | [1.14; 1.81]        | < 0.01           | < 0.0001 | 0.0011   | 0%        |
| Omitting Gonzalez et al., 2014    | 1.39        | [1.10; 1.76]        |            | 1.39        | [1.10; 1.76]        | < 0.01           | 0        | 0        | 0%        |
| Omitting Patel et al., 2023       | 1.51        | [1.16; 1.97]        |            | 1.51        | [1.16; 1.97]        | < 0.01           | 0        | 0        | 0%        |
| <b>Common effect model</b>        | <b>1.44</b> | <b>[1.14; 1.81]</b> |            | <b>1.44</b> | <b>[1.14; 1.81]</b> | <b>&lt; 0.01</b> | <b>0</b> | <b>0</b> | <b>0%</b> |

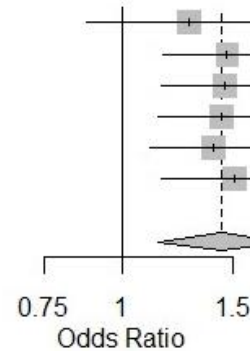

### Leave-one-out QACs

| Study                                | OR          | 95%-CI              | Odds Ratio | OR          | 95%-CI              | P-value     | Tau2          | Tau           | I2         |
|--------------------------------------|-------------|---------------------|------------|-------------|---------------------|-------------|---------------|---------------|------------|
| Omitting Gonzalez et al., 2014       | 1.25        | [1.01; 1.54]        |            | 1.25        | [1.01; 1.54]        | 0.04        | 0.0515        | 0.2270        | 21%        |
| Omitting Ndlela & Naidoo, 2023 (I)   | 1.30        | [1.05; 1.61]        |            | 1.30        | [1.05; 1.61]        | 0.02        | 0.1393        | 0.3733        | 53%        |
| Omitting Ndlela & Naidoo, 2023 (II)  | 1.34        | [1.08; 1.66]        |            | 1.34        | [1.08; 1.66]        | < 0.01      | 0.1023        | 0.3198        | 47%        |
| Omitting Ndlela & Naidoo, 2023 (III) | 1.28        | [1.04; 1.59]        |            | 1.28        | [1.04; 1.59]        | 0.02        | 0.1265        | 0.3556        | 52%        |
| Omitting Patel et al, 2023           | 1.22        | [0.97; 1.53]        |            | 1.22        | [0.97; 1.53]        | 0.08        | 0.0897        | 0.2995        | 45%        |
| Omitting Dumas et al., 2017          | 1.29        | [0.96; 1.73]        |            | 1.29        | [0.96; 1.73]        | 0.09        | 0.1853        | 0.4304        | 53%        |
| Omitting Su et al., 2019(*)          | 1.43        | [1.14; 1.78]        |            | 1.43        | [1.14; 1.78]        | < 0.01      | < 0.0001      | 0.0022        | 23%        |
| Omitting Su et al., 2019(**)         | 1.30        | [1.05; 1.61]        |            | 1.30        | [1.05; 1.61]        | 0.02        | 0.1368        | 0.3699        | 53%        |
| Omitting Su et al., 2019(***)        | 1.30        | [1.05; 1.60]        |            | 1.30        | [1.05; 1.60]        | 0.02        | 0.1336        | 0.3655        | 53%        |
| <b>Common effect model</b>           | <b>1.30</b> | <b>[1.06; 1.60]</b> |            | <b>1.30</b> | <b>[1.06; 1.60]</b> | <b>0.01</b> | <b>0.0999</b> | <b>0.3161</b> | <b>46%</b> |

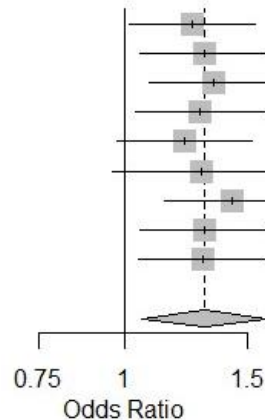

### Leave-one-out use of spray

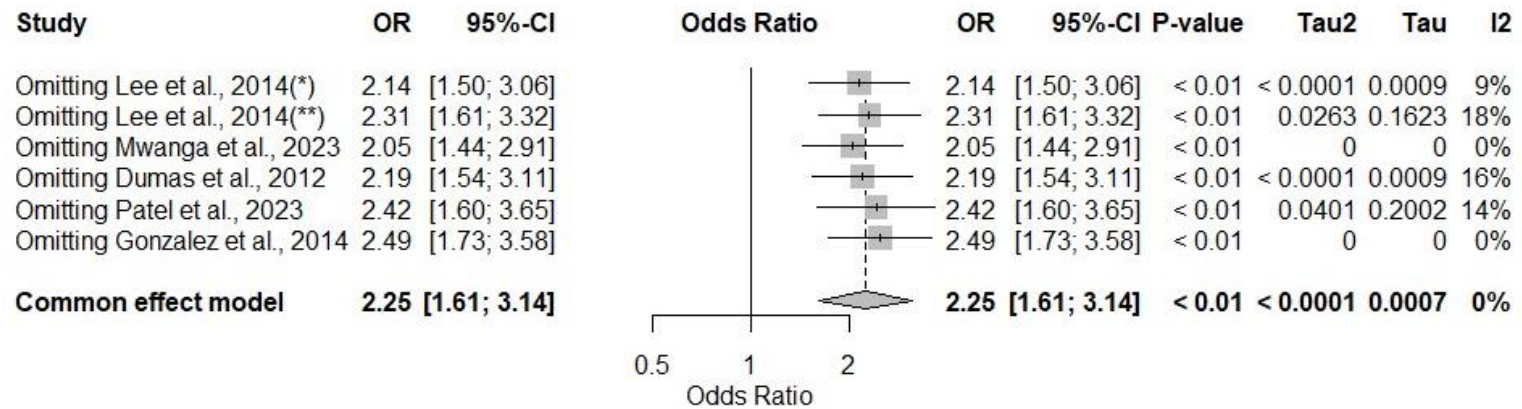

### Leave-one-out general disinfection tasks

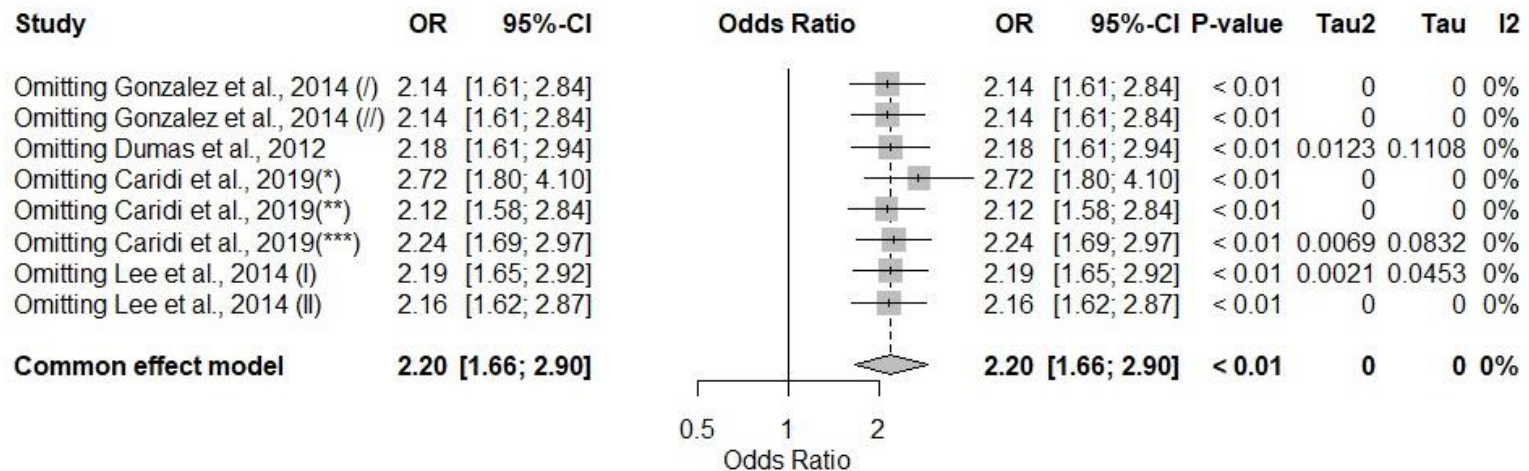

**Table S12. Ratio of odds ratios for disinfectant products and application methods**

The table shows the comparison of the relative odds ratio (ROR) for different disinfectants and application methods. 95% confidence interval (95% CI), General disinfection tasks (GDTs).

**Disinfectants**

| Intervention | ROR | 95% CI ROR | p-value |
|--------------|-----|------------|---------|
|--------------|-----|------------|---------|

Chlorine-based products

|                |      |              |       |
|----------------|------|--------------|-------|
| Glutaraldehyde | 0.84 | [0.67, 1.06] | 0.002 |
|----------------|------|--------------|-------|

|      |      |              |       |
|------|------|--------------|-------|
| QACs | 0.76 | [0.62, 0.94] | 0.012 |
|------|------|--------------|-------|

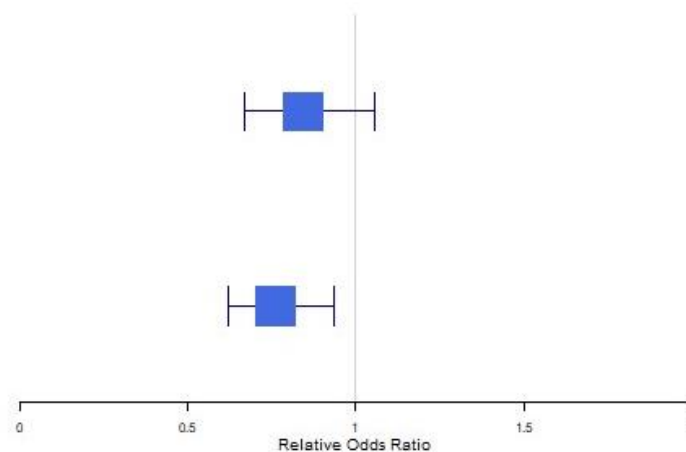

## Application methods

| Intervention | ROR | 95% CI ROR | p-value |
|--------------|-----|------------|---------|
|--------------|-----|------------|---------|

|              |  |  |  |
|--------------|--|--|--|
| Use of spray |  |  |  |
|--------------|--|--|--|

|                            |      |              |       |
|----------------------------|------|--------------|-------|
| General disinfection tasks | 0.98 | [0.74, 1.29] | 0.000 |
|----------------------------|------|--------------|-------|

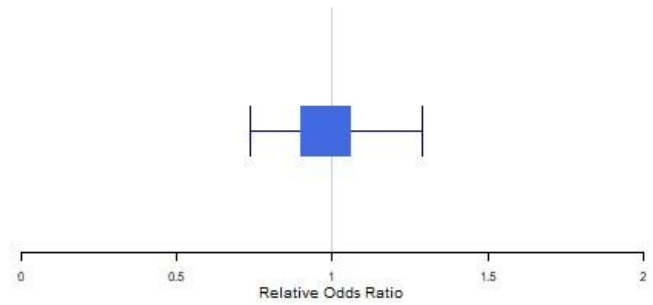

## References

- AD, L., DC, C., & KT, K. (1993). Utility of the complete blood count in routine medical surveillance for ethylene oxide exposure. *American Journal of Industrial Medicine*, 24(2), 191–206. <https://doi.org/10.1002/ajim.4700240206>
- AD, T., Grummt, T., Törnqvist, M., PB, F., FJ, van D., H, van M., HM, S., Osterman-Golkar, S., Uebel, C., YS, T., & al., et. (1991). Biological and chemical monitoring of occupational exposure to ethylene oxide. *Mutation Research*, 250(1), 483–497. [https://doi.org/10.1016/0027-5107\(91\)90205-3](https://doi.org/10.1016/0027-5107(91)90205-3)
- Afework, A., Tamene, A., Tafa, A., Tesfaye, A., & Gemedede, S. (2023). The Prevalence of Occupational Accidents and the Associated Factors Among Janitorial Staff at a University Teaching Hospital in South Ethiopia. *Risk Management and Healthcare Policy*, 16, 1499–1507. <https://doi.org/10.2147/RMHP.S425313>
- Agathos, M., & HA, B. (1982). [Hand dermatitis in medical personnel]. In *Dermatosen in Beruf und Umwelt. Occupation and environment* (Vol. 30, Issue 2, pp. 43–47). <https://pubmed.ncbi.nlm.nih.gov/6211342/>
- Agthe, N., Terho, K., Kurvinen, T., Routamaa, M., Peltonen, R., Laitinen, K., & Kanerva, M. (2009). Microbiological efficacy and tolerability of a new, non-alcohol-based hand disinfectant. *Infection Control and Hospital Epidemiology*, 30(7), 685–690. <https://doi.org/10.1086/598239>
- Ahmed-Lecheheb, D., Cunat, L., Hartemann, P., & Hautemanière, A. (2012). Dermal and pulmonary absorption of ethanol from alcohol-based hand rub. *The Journal of Hospital Infection*, 81(1), 31–35. <https://doi.org/10.1016/j.jhin.2012.02.006>
- Alexandre, A. C. S., Neto, N. M. G., Silva, M. A. S., Santos, D. C. S., Alcoforado, J. M. S. G., & de Melo, D. B. (2021). Construction and validation of checklist for disinfecting ambulances to transport Covid-19 patients. *Revista Gaucha de Enfermagem*, 42. <https://doi.org/10.1590/1983-1447.2021.20200312>
- Alexis DESCATHA Jean-Baptiste BARBE-RICHAUD, Jeremy BLOTTIAUX, G. C. (2022). Human chlorine gas exposition and its management- an umbrella review on human data. *Critical Reviews in Toxicology*, 52, 1–19. <https://doi.org/10.1080/10408444.2022.2035317>
- Alimohammadi, M., & Naderi, M. (2021). Effectiveness of Ozone Gas on Airborne Virus Inactivation in Enclosed Spaces: A Review Study.

*Ozone: Science and Engineering*, 43(1), 21–31. <https://doi.org/10.1080/01919512.2020.1822149>

Alnimr, A., Alamri, A., Salama, K. F., Radi, M., Bukharie, H., Alshehri, B., Rabaan, A. A., & Alshahrani, M. (2021). The environmental deposition of severe acute respiratory syndrome coronavirus 2 in nosocomial settings: Role of the aerosolized hydrogen peroxide. *Risk Management and Healthcare Policy*, 14, 4469–4475. <https://doi.org/10.2147/RMHP.S336085>

Ambrosino, A., Pironti, C., Dell'Annunziata, F., Giugliano, R., Chianese, A., Moccia, G., DeCaro, F., Galdiero, M., Franci, G., & Motta, O. (2022). Investigation of biocidal efficacy of commercial disinfectants used in public, private and workplaces during the pandemic event of SARS-CoV-2. *Scientific Reports*, 12(1). <https://doi.org/10.1038/s41598-022-09575-1>

Amini Tapouk, F., Nabizadeh, R., Mirzaei, N., Hosseini Jazani, N., Yousefi, M., & Valizade Hasanloei, M. A. (2020). Comparative efficacy of hospital disinfectants against nosocomial infection pathogens. *Antimicrobial Resistance and Infection Control*, 9(1). <https://doi.org/10.1186/s13756-020-00781-y>

Amlôt, R., Carter, H., Riddle, L., Larner, J., & RP, C. (2017). Volunteer trials of a novel improvised dry decontamination protocol for use during mass casualty incidents as part of the UK'S Initial Operational Response (IOR). *PloS One*, 12(6), e0179309. <https://doi.org/10.1371/journal.pone.0179309>

Amr, S., & Bollinger, M. E. (2004). Latex allergy and occupational asthma in health care workers: Adverse outcomes. *Environmental Health Perspectives*, 112(3), 378–381. <https://doi.org/10.1289/ehp.6612>

Angelova-Fischer, I., Stilla, T., Kezic, S., Fischer, T. W., & Zillikens, D. (2016). Barrier function and natural moisturizing factor levels after cumulative exposure to short-chain aliphatic alcohols and detergents: Results of occlusion-modified tandem repeated irritation test. *Acta Dermato-Venereologica*, 96(7), 880–884. <https://doi.org/10.2340/00015555-2363>

Anggraini, D., & Lestari, K. S. (2022). IMPLEMENTATION OF ENVIRONMENTAL SANITATION AND DISINFECTION IN HOSPITALS TO REDUCE THE SPREAD OF COVID19: A LITERATURE REVIEW. *Jurnal Kesehatan Lingkungan*, 14(1), 63–70. <https://doi.org/10.20473/jkl.v14i1.2022.63-70>



- Antolín, E., Herrero, B., Rodríguez, R., Illescas, T., Duyos, I., Gimeno, A., Sotillo, L., Abascal, A., Orensanz, I., Hernández, A., & Bartha, J. L. (2021). How to organize a Fetal Medicine Unit in the context of COVID-19 pandemic. Safe measures for obstetric scans and equipment cleaning. *Clinica e Investigacion En Ginecologia y Obstetricia*, 48(1), 3–13. <https://doi.org/10.1016/j.gine.2020.06.013>
- Archangelidi, O., Sathiyajit, S., Consonni, D., Jarvis, D., & De Matteis, S. (2021). Cleaning products and respiratory health outcomes in occupational cleaners: A systematic review and meta-analysis. *Occupational and Environmental Medicine*, 78(8), 541–547. <https://doi.org/10.1136/OEMED-2020-106776>
- Assadian, O., Harbarth, S., Vos, M., JK, K., Asensio, A., & AF, W. (2021). Practical recommendations for routine cleaning and disinfection procedures in healthcare institutions: a narrative review. *The Journal of Hospital Infection*, 113, 104–114. <https://doi.org/10.1016/j.jhin.2021.03.010>
- Astrid, F., Beata, Z., Julia, E., Elisabeth, P., & Magda, D.-E. (2021). The use of a UV-C disinfection robot in the routine cleaning process: a field study in an Academic hospital. *Antimicrobial Resistance and Infection Control*, 10(1). <https://doi.org/10.1186/s13756-021-00945-4>
- Azmi, N. L., Bakar, N. M. A., Rashid, N. I. A., Mafauzy, N. M., Mohamed, A. S. M. H., Mohamad, N. A., Said, S. H., Zawawi, N. I. A., & Mohamed, N. S. F. (2021). Development and validation of a questionnaire on knowledge and practices of disinfection and sterilization among healthcare workers. *Gulhane Medical Journal*, 63(4), 280–286. <https://doi.org/10.4274/GULHANE.GALENOS.2021.1564>
- Babić, A., Turk, R., & MacAn, J. (2020). Toxicological aspects of increased use of surface and hand disinfectants in Croatia during the COVID-19 pandemic: A preliminary report. *Arhiv Za Higijenu Rada i Toksikologiju*, 71(3), 261–264. <https://doi.org/10.2478/aiht-2020-71-3470>
- Baccolini, V., D'Egidio, V., P, de S., Migliara, G., Massimi, A., Alessandri, F., Tellan, G., Marzuillo, C., C, D. V., MV, R., & Villari, P. (2019). Effectiveness over time of a multimodal intervention to improve compliance with standard hygiene precautions in an intensive care unit of a large teaching hospital. In *Antimicrobial resistance and infection control* (Vol. 8, p. 92). <https://doi.org/10.1186/s13756-019-0544-0>
- Barbaud, A. (2002). [Occupational dermatitis in health care personnel]. In *La Revue du praticien* (Vol. 52, Issue 13, pp. 1425–1432). <https://pubmed.ncbi.nlm.nih.gov/12385152/>

- Bardaweel, S. K., Almuhaissen, S. A., Abdul-Hadi, A. A., Al-Masri, Q. S., & Musleh, H. R. (2023). Knowledge and Practices of Disinfectants and Sanitizers Use during COVID-19 Pandemic in Jordan. *Jordan Journal of Pharmaceutical Sciences*, *16*(1), 82–95. <https://doi.org/10.35516/jjps.v16i1.1065>
- Batalla, A., García-Doval, I., & de la Torre, C. (2012). Products for Hand Hygiene and Antisepsis: Use by Health Professionals and Relationship With Hand Eczema. *Actas Dermo-Sifiliográficas (English Edition)*, *103*(3), 192–197. <https://doi.org/https://doi.org/10.1016/j.adengl.2012.04.004>
- Bauer, A., Pesonen, M., Brans, R., Caroppo, F., Dickel, H., Dugonik, A., Larese Filon, F., Geier, J., Gimenez-Arnau, A. M., Napolitano, M., Patruno, C., Rustemeyer, T., Simon, D., Schuttelaar, M. L. A., Spiewak, R., Stingeni, L., Vok, M., Weisshaar, E., Wilkinson, M., ... Uter, W. (2023). Occupational contact allergy: The European perspective—Analysis of patch test data from ESSCA between 2011 and 2020. *Contact Dermatitis*, *88*(4), 263–274. <https://doi.org/10.1111/cod.14280>
- Bédard, A., Varraso, R., Sanchez, M., Clavel-Chapelon, F., Zock, J.-P., Kauffmann, F., & Le Moual, N. (2014). Cleaning sprays, household help and asthma among elderly women. *Respiratory Medicine*, *108*(1), 171–180. <https://doi.org/10.1016/j.rmed.2013.10.018>
- Berger, D., Gundermann, G., Sinha, A., Moroi, M., Goyal, N., & Tsai, A. (2022). Review of aerosolized hydrogen peroxide, vaporized hydrogen peroxide, and hydrogen peroxide gas plasma in the decontamination of filtering facepiece respirators. *American Journal of Infection Control*, *50*(2), 203–213. <https://doi.org/10.1016/j.ajic.2021.06.012>
- Bernardini, P., Carelli, G., Rimatori, V., & Contegiacomo, P. (1983). Health hazard for hospital workers from exposure to formaldehyde. *La Medicina Del Lavoro*, *74*(2), 106–110. <https://pubmed.ncbi.nlm.nih.gov/6865837/>
- Bessonneau, V., Mosqueron, L., Berrubé, A., Mukensturm, G., Buffet-Bataillon, S., Gangneux, J.-P., & Thomas, O. (2013). VOC Contamination in Hospital, from Stationary Sampling of a Large Panel of Compounds, in View of Healthcare Workers and Patients Exposure Assessment. *PLoS ONE*, *8*(2). <https://doi.org/10.1371/journal.pone.0055535>
- Bhat, S. A., Sher, F., Kumar, R., Karahmet, E., Haq, S. A. U., Zafar, A., & Lima, E. C. (2022). Environmental and health impacts of spraying COVID-19 disinfectants with associated challenges. *Environmental Science and Pollution Research*, *29*(57), 85648–85657.

<https://doi.org/10.1007/s11356-021-16575-7>

- Bijlsma, N., & Cohen, M. M. (2016). Environmental chemical assessment in clinical practice: Unveiling the elephant in the room. *International Journal of Environmental Research and Public Health*, *13*(2). <https://doi.org/10.3390/ijerph13020181>
- Blackley, B. H., Nett, R. J., Cox-Ganser, J. M., Harvey, R. R., & Virji, M. A. (2023). Eye and airway symptoms in hospital staff exposed to a product containing hydrogen peroxide, peracetic acid, and acetic acid. *American Journal of Industrial Medicine*, *66*(8), 655–669. <https://doi.org/10.1002/AJIM.23488>
- Brune, Z., Kuschner, C. E., Mootz, J., Davidson, K. W., Pena, R. C. F., Ghanem, M. H., Fischer, A., Gitman, M., Teperman, L., Mason, C., & Becker, L. B. (2021). Effectiveness of sars-cov-2 decontamination and containment in a covid-19 icu. *International Journal of Environmental Research and Public Health*, *18*(5), 1–9. <https://doi.org/10.3390/ijerph18052479>
- Burgaz, S., Rezanko, R., Kara, S., & Karakaya, A. E. (1992). Thioethers in urine of sterilization personnel exposed to ethylene oxide. *Journal of Clinical Pharmacy and Therapeutics*, *17*(3), 169–172. <https://doi.org/10.1111/j.1365-2710.1992.tb01287.x>
- Byrns, G., Barham, B., Yang, L., Webster, K., Rutherford, G., Steiner, G., Petras, D., & Scannell, M. (2017). The uses and limitations of a hand-held germicidal ultraviolet wand for surface disinfection. *Journal of Occupational and Environmental Hygiene*, *14*(10), 749–757. <https://doi.org/10.1080/15459624.2017.1328106>
- Caetano, M. H., Zen Siqueira, J. P., De Andrade, D., De Sousa, Á. F. L., Rigotti, M. A., Diniz, M. O., De Almeida, W. A., Ferreira, A. M., & De Almeida, M. T. G. (2021). Antimicrobial action of ozone gas on surfaces and in the air. *ACTA Paulista de Enfermagem*, *34*. <https://doi.org/10.37689/ACTA-APE/2021AO02712>
- Caridi, M. N., Humann, M. J., Liang, X., Su, F. C., Stefaniak, A. B., LeBouf, R. F., Stanton, M. L., Virji, M. A., & Henneberger, P. K. (2019). Occupation and task as risk factors for asthma-related outcomes among healthcare workers in New York City. *International Journal of Hygiene and Environmental Health*, *222*(2), 211–220. <https://doi.org/10.1016/J.IJHEH.2018.10.001>
- Carling, P. C. (2021). Health Care Environmental Hygiene: New Insights and Centers for Disease Control and Prevention Guidance. *Infectious*

*Disease Clinics of North America*, 35(3), 609–629. <https://doi.org/10.1016/j.idc.2021.04.005>

Carling, P. C., Parry, M. F., & Olmstead, R. (2023). Environmental approaches to controlling *Clostridioides difficile* infection in healthcare settings. *Antimicrobial Resistance and Infection Control*, 12(1). <https://doi.org/10.1186/s13756-023-01295-z>

Carol Sharma, B. G. H., Kumar, S. D., & Ghosh, S. (2023). Prospects and retrospects of occupational hazards amongst healthcare workers. *Biomedicine (India)*, 43(1), 1–7. <https://doi.org/10.51248/.v43i1.2562>

Carvalho, A. P. A., & Conte-Junior, C. A. (2021). Recent Advances on Nanomaterials to COVID-19 Management: A Systematic Review on Antiviral/Virucidal Agents and Mechanisms of SARS-CoV-2 Inhibition/Inactivation. *Global Challenges*, 5(5). <https://doi.org/10.1002/gch2.202000115>

Casey, M. L., Hawley, B., Edwards, N., Cox-Ganser, J. M., & Cummings, K. J. (2017). Health problems and disinfectant product exposure among staff at a large multispecialty hospital. *American Journal of Infection Control*, 45(10), 1133–1138. <https://doi.org/10.1016/J.AJIC.2017.04.003>

CC, H., CF, W., WC, S., MF, C., CY, C., YC, C., SH, L., SY, C., & KY, W. (2011). Comparative analysis of urinary N7-(2-hydroxyethyl)guanine for ethylene oxide- and non-exposed workers. In *Toxicology letters* (Vol. 202, Issue 3, pp. 237–243). <https://doi.org/10.1016/j.toxlet.2011.02.009>

Cebeci, D., Karasel, S., Rifki, D., Yesildağlı, H., & Kalfaoglu, M. (2021). The Effect of Personal Protective Equipment (PPE) and Disinfectants on Skin Health During Covid 19 Pandemia. *Medical Archives*, 75(5), 361–365. <https://doi.org/10.5455/medarh.2021.75.361-365>

Centers for Diseases Prevention and Control. (1984). Dermatitis among hospital workers--Oregon. *MMWR. Morbidity and Mortality Weekly Report*, 33(48), 681–682. <https://pubmed.ncbi.nlm.nih.gov/6239090/>

Chaari, N., Sakly, A., Amri, C., Mahfoudh, A., MA, H., Khalfallh, T., Bchir, N., & Akrou, M. (2010). Occupational allergy in healthcare workers. *Recent Patents on Inflammation & Allergy Drug Discovery*, 4(1), 65–74. <https://doi.org/10.2174/187221310789895630>

Chang, Y. B., Lee, F. Y., Goh, M. M., Lam, D. K. H., & Tan, A. B. H. (2018). Assessment of occupational exposure to airborne chlorine dioxide

of healthcare workers using impregnated wipes during high-level disinfection of non-lumened flexible nasoendoscopes. *Journal of Occupational and Environmental Hygiene*, 15(12), 818–823. <https://doi.org/10.1080/15459624.2018.1523617>

Charlier, B., Coglianesi, A., De Rosa, F., De Caro, F., Piazza, O., Motta, O., Borrelli, A., Capunzo, M., Filippelli, A., & Izzo, V. (2021). Chemical risk in hospital settings: Overview on monitoring strategies and international regulatory aspects. *Journal of Public Health Research*, 10(1). <https://doi.org/10.4081/JPHR.2021.1993>

Choi, H., Chatterjee, P., Lichtfouse, E., Martel, J. A., Hwang, M., Jinadatha, C., & Sharma, V. K. (2021). Classical and alternative disinfection strategies to control the COVID-19 virus in healthcare facilities: a review. *Environmental Chemistry Letters*, 19(3), 1945–1951. <https://doi.org/10.1007/s10311-021-01180-4>

CL, H., AM, P., JL, C., & RL, N. (2016). Occupational skin disease among Australian healthcare workers: a retrospective analysis from an occupational dermatology clinic, 1993-2014. *Contact Dermatitis*, 75(4), 213–222. <https://doi.org/10.1111/cod.12616>

Clausen, P. A., Frederiksen, M., Sejbæk, C. S., Sørli, J. B., Hougaard, K. S., Frydendall, K. B., Carøe, T. K., Flachs, E. M., Meyer, H. W., Schlünssen, V., & Wolkoff, P. (2020). Chemicals inhaled from spray cleaning and disinfection products and their respiratory effects. A comprehensive review. *International Journal of Hygiene and Environmental Health*, 229. <https://doi.org/10.1016/j.ijheh.2020.113592>

Cochrane, S. A., Arts, J. H. E., Ehnes, C., Hindle, S., Hollnagel, H. M., Poole, A., Suto, H., & Kimber, I. (2015). Thresholds in chemical respiratory sensitisation. *Toxicology*, 333, 179–194. <https://doi.org/10.1016/j.tox.2015.04.010>

Coggon, D., Harris, E. C., Poole, J., & Palmer, K. T. (2004). Mortality of workers exposed to ethylene oxide: Extended follow up of a British cohort. *Occupational and Environmental Medicine*, 61(4), 358–362. <https://doi.org/10.1136/oem.2003.008268>

CP, H., LG, D., & PA, R. (2005). Occupation-related allergies in dentistry. *Journal of the American Dental Association (1939)*, 136(4), 500–510. <https://doi.org/10.14219/jada.archive.2005.0207>

Cucurachi, G., & MG, T. (2010). [Disinfectants for the skin of premature]. *Minerva pediatrica*, 62(3), 157–159. <https://pubmed.ncbi.nlm.nih.gov/21090087/>

- Curran, E. T., Wilkinson, M., & Bradley, T. (2019). Chemical disinfectants: Controversies regarding their use in low risk healthcare environments (part 1). *Journal of Infection Prevention*, 20(2), 76–82. <https://doi.org/10.1177/1757177419828139>
- Cutts, T., Kasloff, S., Safronetz, D., & Krishnan, J. (2021). Decontamination of common healthcare facility surfaces contaminated with SARS-CoV-2 using peracetic acid dry fogging. *Journal of Hospital Infection*, 109, 82–87. <https://doi.org/10.1016/j.jhin.2020.12.016>
- Cutuli, M. A., Guarnieri, A., Pietrangelo, L., Magnifico, I., Venditti, N., Recchia, L., Mangano, K., Nicoletti, F., Marco, R. D., & Petronio, G. P. (2021). Potential mucosal irritation discrimination of surface disinfectants employed against sars-cov-2 by limacus flavus slug mucosal irritation assay. *Biomedicines*, 9(4). <https://doi.org/10.3390/biomedicines9040424>
- CY, L., HX, G., Li, J., & WP, T. (2003). Effects of iodophor on the thyroid glands of female medical workers. In *Zhonghua yi xue za zhi* (Vol. 83, Issue 8, pp. 647–649). <https://pubmed.ncbi.nlm.nih.gov/12887820/>
- Daba, C., Gebrehiwot, M., Asefa, L., Lemma, H., Atamo, A., Kebede, E., Embrandiri, A., & Debela, S. A. (2022). Occupational safety of janitors in Ethiopian University during COVID-19 pandemic: Results from observational study. *Frontiers in Public Health*, 10. <https://doi.org/10.3389/fpubh.2022.895977>
- Dalton, P. H., Maute, C., Hicks, J. B., Watson, H. N., Loccisano, A. E., & Kerger, B. D. (2023). Environmental chamber studies of eye and respiratory irritation from use of a peracetic acid-based hospital surface disinfectant. *Antimicrobial Stewardship and Healthcare Epidemiology*, 3(1). <https://doi.org/10.1017/ASH.2023.138>
- Davidovits, M., Barak, A., Cleper, R., Krause, I., Gamzo, Z., & Eisenstein, B. (2003). Methaemoglobinaemia and haemolysis associated with hydrogen peroxide in a paediatric haemodialysis centre: a warning note. *Nephrology, Dialysis, Transplantation : Official Publication of the European Dialysis and Transplant Association - European Renal Association*, 18(11), 2354–2358. <https://doi.org/10.1093/ndt/gfg395>
- De Groot, R., Van Zoelen, G. A., Leenders, M. E. C., Van Riel, A. J. H. P., De Vries, I., & De Lange, D. W. (2021). Is secondary chemical exposure of hospital personnel of clinical importance? *Clinical Toxicology*, 59(4), 269–278. <https://doi.org/10.1080/15563650.2020.1860216>
- de Oliveira, C. R., de Oliveira Carvalho, M. C., Schmitz, G. V., de Souza Botelho Almeida, T., Carvalho, H. C., Fernandes, A. B., & de Lima, C. J.

(2023). Ozonated water in disinfection of hospital instrument table. *Research on Biomedical Engineering*, 39(2), 329–334.

<https://doi.org/10.1007/s42600-023-00272-0>

De Troeyer, K., De Man, J., Vandebroek, E., Vanoirbeek, J. A., Hoet, P. H. M., Nemery, B., Vanroelen, C., Casas, L., & Ronsmans, S. (2022). Identifying cleaning products associated with short-term work-related respiratory symptoms: A workforce-based study in domestic cleaners. *Environment International*, 162, 107170. <https://doi.org/https://doi.org/10.1016/j.envint.2022.107170>

Delclos, G. L., Gimeno, D., Arif, A. A., Burau, K. D., Carson, A., Lusk, C., Stock, T., Symanski, E., Whitehead, L. W., Zock, J.-P., Benavides, F. G., & Antó, J. M. (2007). Occupational risk factors and asthma among health care professionals. *American Journal of Respiratory and Critical Care Medicine*, 175(7), 667–675. <https://doi.org/10.1164/rccm.200609-1331OC>

Descatha, A., Hamzaoui, H., Takala, J., & Oppliger, A. (2023). A systematised overview of published reviews on biological hazards, occupational health and safety. *Safety and Health at Work*. <https://doi.org/https://doi.org/10.1016/j.shaw.2023.10.008>

Dhama, K., Patel, S. K., Kumar, R., Masand, R., Rana, J., Yattoo, M. I., Tiwari, R., Sharun, K., Mohapatra, R. K., Natesan, S., Dhawan, M., Ahmad, T., Emran, T. B., Malik, Y. S., & Harapan, H. (2021). The role of disinfectants and sanitizers during COVID-19 pandemic: advantages and deleterious effects on humans and the environment. *Environmental Science and Pollution Research*, 28(26), 34211–34228. <https://doi.org/10.1007/s11356-021-14429-w>

Ding, M., Lawson, C., Johnson, C., Rich-Edwards, J., Gaskins, A. J., Boiano, J., Henn, S., Rocheleau, C., & Chavarro, J. E. (2021). Occupational exposure to high-level disinfectants and risk of miscarriage among nurses. *Occupational and Environmental Medicine*, 78(10), 731–737. <https://doi.org/10.1136/OEMED-2020-107297>

DJ, T., Haines, T., Lawrence, M., & Rosa, N. (1993). A study of sister chromatid exchange and somatic cell mutation in hospital workers exposed to ethylene oxide. *Environmental Health Perspectives*, 101, 159–164. <https://doi.org/10.1289/ehp.93101s3159>

Doll, M., Stevens, M., & Bearman, G. (2018). Environmental cleaning and disinfection of patient areas. *International Journal of Infectious Diseases*, 67, 52–57. <https://doi.org/10.1016/j.ijid.2017.10.014>

- Donnay, C., Denis, M.-A., Magis, R., Fevotte, J., Massin, N., Dumas, O., Pin, I., Choudat, D., Kauffmann, F., & Le Moual, N. (2011). Under-estimation of self-reported occupational exposure by questionnaire in hospital workers. *Occupational and Environmental Medicine*, 68(8), 611–617. <https://doi.org/10.1136/oem.2010.061671>
- Doolan, B. T., & Crilly, H. M. (2019). Chlorhexidine wipes: Time to stop and think about allergy. *Anaesthesia and Intensive Care*, 47(1), 90–95. <https://doi.org/10.1177/0310057X18811974>
- Dore, M. A., Torabizadeh, C., & Keshtkaran, Z. (2022). Threats to operating room personnel’s occupational safety and health: a qualitative study. *Anaesthesia, Pain and Intensive Care*, 26(3), 368–381. <https://doi.org/10.35975/apic.v26i3.1912>
- Dorgham, N. A., & Dorgham, D. A. (2021). Disinfectants and skin antiseptics for safe prophylaxis against covid-19, review of literature. *Open Dermatology Journal*, 15(1), 16–22. <https://doi.org/10.2174/1874372202115010016>
- Dotson, G. S., Lotter, J. T., Zisook, R. E., Gaffney, S. H., Maier, A., & Colvin, J. (2020). Setting occupational exposure limits for antimicrobial agents: A case study based on a quaternary ammonium compound-based disinfectant. *Toxicology and Industrial Health*, 36(9), 619–633. <https://doi.org/10.1177/0748233720970438>
- Dumas, O. (2021). Cleaners and airway diseases. *Current Opinion in Allergy and Clinical Immunology*, 21(2), 101–109. <https://doi.org/10.1097/ACI.0000000000000710>
- Dumas, O., Bédard, A., Marbac, M., Sedki, M., Temam, S., Chanoine, S., Severi, G., Boutron-Ruault, M.-C., Garcia-Aymerich, J., Siroux, V., Varraso, R., & Le Moual, N. (2021). Household Cleaning and Poor Asthma Control Among Elderly Women. *Journal of Allergy and Clinical Immunology: In Practice*, 9(6), 2358-2365.e4. <https://doi.org/10.1016/j.jaip.2021.02.022>
- Dumas, O., Boggs, K. M., Quinot, C., Varraso, R., Zock, J. P., Henneberger, P. K., Speizer, F. E., Le Moual, N., & Camargo, C. A. (2020). Occupational exposure to disinfectants and asthma incidence in U.S. nurses: A prospective cohort study. *American Journal of Industrial Medicine*, 63(1), 44–50. <https://doi.org/10.1002/AJIM.23067>
- Dumas, O., Donnay, C., Heederik, D. J. J., Héry, M., Choudat, D., Kauffmann, F., & Moual, N. Le. (2012). Occupational exposure to cleaning



products and asthma in hospital workers. *Occupational and Environmental Medicine*, 69(12), 883–889. <https://doi.org/10.1136/OEMED-2012-100826>

Dumas, O., Gaskins, A. J., Boggs, K. M., Henn, S. A., Le Moual, N., Varraso, R., Chavarro, J. E., & Camargo, C. A. (2021). Occupational use of high-level disinfectants and asthma incidence in early to mid-career female nurses: a prospective cohort study. *Occupational and Environmental Medicine*, 78(4), 244. <https://doi.org/10.1136/OEMED-2020-106793>

Dumas, O., & Le Moual, N. (2020). Damaging effects of household cleaning products on the lungs. *Expert Review of Respiratory Medicine*, 14(1), 1–4. <https://doi.org/10.1080/17476348.2020.1689123>

Dumas, O., Siroux, V., Luu, F., Nadif, R., Zock, J.-P., Kauffmann, F., & Le Moual, N. (2014). Cleaning and asthma characteristics in women. *American Journal of Industrial Medicine*, 57(3), 303–311. <https://doi.org/10.1002/ajim.22244>

Dumas, O., Varraso, R., Zock, J. P., Henneberger, P. K., Speizer, F. E., Wiley, A. S., Le Moual, N., & Camargo, C. A. (2015). Asthma history, job type and job changes among US nurses. *Occupational and Environmental Medicine*, 72(7), 482–488. <https://doi.org/10.1136/oemed-2014-102547>

Dumas, O., Wiley, A. S., Henneberger, P. K., Speizer, F. E., Zock, J.-P., Varraso, R., Le Moual, N., Boggs, K. M., & Camargo, C. A. (2017). Determinants of disinfectant use among nurses in U.S. healthcare facilities. *American Journal of Industrial Medicine*, 60(1), 131–140. <https://doi.org/10.1002/ajim.22671>

Dumas, O., Wiley, A. S., Quinot, C., Varraso, R., Zock, J. P., Henneberger, P. K., Speizer, F. E., Le Moual, N., & Camargo, C. A. (2017). Occupational exposure to disinfectants and asthma control in US nurses. *European Respiratory Journal*, 50(4). <https://doi.org/10.1183/13993003.00237-2017>

EL, B., JD, L., JA, N., Xu, M., Joo, T., NL, N., BE, S., PJ, S., & MG, F. (2020). Enveloped Virus Inactivation on Personal Protective Equipment by Exposure to Ozone. In *medRxiv : the preprint server for health sciences*. <https://doi.org/10.1101/2020.05.23.20111435>

Epelle, E. I., Macfarlane, A., Cusack, M., Burns, A., Okolie, J. A., Mackay, W., Rateb, M., & Yaseen, M. (2023). Ozone application in different

industries: A review of recent developments. *Chemical Engineering Journal*, 454, 140188.

<https://doi.org/https://doi.org/10.1016/j.cej.2022.140188>

Erdem, Y., IK, A., A, A. Ç., Inal, S., Ugurer, E., Sivaz, O., HE, K., IE, G., Sekerlisoy, G., Vural, O., & Özkaya, E. (2020). The risk of hand eczema in healthcare workers during the COVID-19 pandemic: Do we need specific attention or prevention strategies? *Contact Dermatitis*, 83(5), 422–423. <https://doi.org/10.1111/cod.13632>

Erfani, B., Vilela, L., Julander, A., & Schenk, L. (2023). Safety data sheets as an information pathway on hazards of occupationally used cleaning agents. *Regulatory Toxicology and Pharmacology*, 142. <https://doi.org/10.1016/j.yrtph.2023.105447>

Estienney, M., Daval-Frerot, P., LS, A.-G., Piroth, L., Stabile, P., JY, G., Rouleau, R., A, de R., & Belliot, G. (2022). Use of a Hydrogen Peroxide Nebulizer for Viral Disinfection of Emergency Ambulance and Hospital Waiting Room. *Food and Environmental Virology*, 14(2), 217–221. <https://doi.org/10.1007/s12560-022-09519-y>

Estrin, W. J., Cavalieri, S. A., Wald, P., Becker, C. E., Jones, J. R., & Cone, J. E. (1987). Evidence of Neurologic Dysfunction Related to Long-term Ethylene Oxide Exposure. *Archives of Neurology*, 44(12), 1283–1286. <https://doi.org/10.1001/ARCHNEUR.1987.00520240057012>

F, D. S., Siriruttanapruk, S., JS, M., & PS, B. (1998). Occupational asthma due to glutaraldehyde. *Monaldi Archives for Chest Disease = Archivio Monaldi per Le Malattie Del Torace*, 53(1), 50–55. <https://pubmed.ncbi.nlm.nih.gov/9632908/>

Faller, E. M., Bin Miskam, N., & Pereira, A. (2018). Exploratory study on occupational health hazards among health care workers in the Philippines. *Annals of Global Health*, 84(3), 338–341. <https://doi.org/10.29024/aogh.2316>

Felemban, E. M., Youssef, H. A. M., & Thobaity, A. A. (2021). Factors affecting the decontamination process in hospitals in Saudi Arabia. *Risk Management and Healthcare Policy*, 14, 357–363. <https://doi.org/10.2147/RMHP.S295262>

Fickenscher, M.-C., Stewart, M., Helber, R., Quilligan, E. J., Kreitenberg, A., Prietto, C. A., & Gardner, V. O. (2023). Operating room disinfection: operator-driven ultraviolet ‘C’ vs. chemical treatment. *Infection Prevention in Practice*, 5(3), 100301. <https://doi.org/https://doi.org/10.1016/j.infpip.2023.100301>

- Flyvholm, M.-A. (1993). Contact allergens in registered cleaning agents for industrial and household use. *British Journal of Industrial Medicine*, 50(11), 1043–1050. <https://doi.org/10.1136/oem.50.11.1043>
- Folletti, I., Siracusa, A., & Paolucci, G. (2017). Update on asthma and cleaning agents. *Current Opinion in Allergy and Clinical Immunology*, 17(2), 90–95. <https://doi.org/10.1097/ACI.0000000000000349>
- França, D., Sacadura-Leite, E., Fernandes-Almeida, C., & Filipe, P. (2019). Occupational dermatoses among healthcare workers in a hospital center in Portugal. *Revista Brasileira de Medicina Do Trabalho*, 17(3), 285–291. <https://doi.org/10.5327/Z1679443520190393>
- Frickmann, H., Bachert, S., Warnke, P., & Podbielski, A. (2018). Validated measurements of microbial loads on environmental surfaces in intensive care units before and after disinfecting cleaning. *Journal of Applied Microbiology*, 124(3), 874–880. <https://doi.org/10.1111/jam.13675>
- Gannon, P. F. G., Bright, P., Campbell, M., O’Hickey, S. P., & Sherwood Burge, P. (1995). Occupational asthma due to glutaraldehyde and formaldehyde in endoscopy and x ray departments. *Thorax*, 50(2), 156–159. <https://doi.org/10.1136/THX.50.2.156>
- García-Ávila, F., Valdiviezo-Gonzales, L., Cadme-Galabay, M., Gutiérrez-Ortega, H., Altamirano-Cárdenas, L., Arévalo, C. Z.-, & Flores del Pino, L. (2020). Considerations on water quality and the use of chlorine in times of SARS-CoV-2 (COVID-19) pandemic in the community. *Case Studies in Chemical and Environmental Engineering*, 2, 100049. <https://doi.org/https://doi.org/10.1016/j.cscee.2020.100049>
- Garrido, A. N., House, R., Lipszyc, J. C., Liss, G. M., Holness, D. L., & Tarlo, S. M. (2022). Cleaning agent usage in healthcare professionals and relationship to lung and skin symptoms. *Journal of Asthma*, 59(4), 673–681. <https://doi.org/10.1080/02770903.2021.1871740>
- Garvey, M. I., Wilkinson, M. A. C., Bradley, C. W., Holden, K. L., & Holden, E. (2018). Wiping out MRSA: Effect of introducing a universal disinfection wipe in a large UK teaching hospital. *Antimicrobial Resistance and Infection Control*, 7(1). <https://doi.org/10.1186/s13756-018-0445-7>
- Gaskins, A. J., Chavarro, J. E., Rich-Edwards, J. W., Missmer, S. A., Laden, F., Henn, S. A., & Lawson, C. C. (2017). Occupational use of high-level disinfectants and fecundity among nurses. *Scandinavian Journal of Work, Environment and Health*, 43(2), 171–180.

<https://doi.org/10.5271/SJWEH.3623>

- Gasparini, G., Carmisciano, L., Giberti, I., Murgioni, F., Parodi, A., & Gallo, R. (2020). Healthy Hands: a pilot study for the prevention of chronic hand eczema in healthcare workers of an Italian University Hospital. *Giornale Italiano Di Dermatologia e Venereologia : Organo Ufficiale, Societa Italiana Di Dermatologia e Sifilografia*, 155(6), 760–763. <https://doi.org/10.23736/S0392-0488.19.06220-5>
- Ge, T., Lu, Y., Zheng, S., Zhuo, L., Yu, L., Ni, Z., Zhou, Y., Ni, L., Qu, T., & Zhong, Z. (2021). Evaluation of disinfection procedures in a designated hospital for COVID-19. *American Journal of Infection Control*, 49(4), 447–451. <https://doi.org/10.1016/j.ajic.2020.08.028>
- Gerding, T., Wang, J., & Newman, N. (2023). Examining Work Stress and Air Pollutants Exposure of Home Healthcare Workers. *Atmosphere*, 14(9). <https://doi.org/10.3390/atmos14091393>
- Gerster, F. M., Vernez, D., Wild, P. P., & Hopf, N. B. (2014). Hazardous substances in frequently used professional cleaning products. *International Journal of Occupational and Environmental Health*, 20(1), 46–60. <https://doi.org/10.1179/2049396713Y.0000000052>
- Ghafoor, D., Khan, Z., Khan, A., Ualiyeva, D., & Zaman, N. (2021). Excessive use of disinfectants against COVID-19 posing a potential threat to living beings. *Current Research in Toxicology*, 2, 159–168. <https://doi.org/https://doi.org/10.1016/j.crttox.2021.02.008>
- Gharaibeh, A., Smith, R. H., & Conway, M. J. (2021). Reducing Spread of Infections with a Photocatalytic Reactor—Potential Applications in Control of Hospital *Staphylococcus aureus* and *Clostridioides difficile* Infections and Inactivation of RNA Viruses. *Infectious Disease Reports*, 13(1), 58–71. <https://doi.org/10.3390/IDR13010008>
- Ghelli, F., Cocchi, E., Bellisario, V., Buglisi, M., Squillacioti, G., Santovito, A., & Bono, R. (2022). The formation of SCEs as an effect of occupational exposure to formaldehyde. *Archives of Toxicology*, 96(4), 1101–1108. <https://doi.org/10.1007/s00204-022-03238-w>
- Gonzalez, M., Jégu, J., Kopferschmitt, M. C., Donnay, C., Hedelin, G., Matzinger, F., Velten, M., Guilloux, L., Cantineau, A., & de Blay, F. (2014). Asthma among workers in healthcare settings: Role of disinfection with quaternary ammonium compounds. *Clinical and Experimental Allergy*, 44(3), 393–406. <https://doi.org/10.1111/cea.12215>
- Goodyear, N., Markkanen, P., Beato-Melendez, C., Mohamed, H., Gore, R., Galligan, C., Sama, S., & Quinn, M. (2018). Cleaning and

- disinfection in home care: A comparison of 2 commercial products with potentially different consequences for respiratory health. *American Journal of Infection Control*, 46(4), 410–416. <https://doi.org/https://doi.org/10.1016/j.ajic.2017.09.033>
- Gould, D. (1994). Nurses' hand decontamination practice: results of a local study. In *The Journal of hospital infection* (Vol. 28, Issue 1, pp. 15–30). [https://doi.org/10.1016/0195-6701\(94\)90149-x](https://doi.org/10.1016/0195-6701(94)90149-x)
- Graham, D., Lee, C., & Jordan, B. J. (2023). Dry Hydrogen Peroxide: one molecule for a One Health approach—a narrative review. *Journal of Public Health and Emergency*, 7. <https://doi.org/10.21037/jphe-22-105>
- Groenewold, M., Brown, L., Smith, E., Haring Sweeney, M., Pana-Cryan, R., & Schnorr, T. (2019). Burden of occupational morbidity from selected causes in the United States overall and by NORA industry sector, 2012: A conservative estimate. *American Journal of Industrial Medicine*, 62(12), 1117–1134. <https://doi.org/10.1002/ajim.23048>
- Gruszecka, J., Filip, R., & Gutkowska, D. (2021). The state of microbiological cleanliness of surfaces and equipment of an endoscopic examination laboratory—data from a reference tertiary clinical endoscopy center in southern poland. *International Journal of Environmental Research and Public Health*, 18(12). <https://doi.org/10.3390/ijerph18126346>
- GS, G. (1988). Decontamination: a microbiologist's perspective. *Journal of Healthcare Materiel Management*, 6(1), 36–41. <https://pubmed.ncbi.nlm.nih.gov/10285793/>
- Gupta, R. K., Micochova, P., Chadha, A., Hesselroj, T., Fraternali, F., & Ramsden, J. J. (2021). Rapid inactivation of SARS-CoV-2 by titanium dioxide surface coating. *Wellcome Open Research*, 6. <https://doi.org/10.12688/wellcomeopenres.16577.2>
- Gutterman, E., Jorgensen, L., Mitchell, A., & Fua, S. (2013). Adverse staff health outcomes associated with endoscope reprocessing. *Biomedical Instrumentation & Technology*, 47(2), 172–179. <https://doi.org/10.2345/0899-8205-47.2.172>
- HA, W. (1992). Glutaraldehyde allergy in hospital workers. In *Lancet (London, England)* (Vol. 339, Issue 8797, p. 880). [https://doi.org/10.1016/0140-6736\(92\)90329-2](https://doi.org/10.1016/0140-6736(92)90329-2)
- Hamnerius, N., Pontén, A., Bergendorff, O., Bruze, M., Björk, J., & Svedman, C. (2021). Skin exposures, hand eczema and facial skin disease in

healthcare workers during the covid-19 pandemic: A cross-sectional study. *Acta Dermato-Venereologica*, 101(9).

<https://doi.org/10.2340/00015555-3904>

Hamnerius, N., Svedman, C., Bergendorff, O., Björk, J., Bruze, M., Engfeldt, M., & Pontén, A. (2018). Hand eczema and occupational contact allergies in healthcare workers with a focus on rubber additives. *Contact Dermatitis*, 79(3), 149–156. <https://doi.org/10.1111/cod.13042>

Hamnerius, N., Svedman, C., Bergendorff, O., Björk, J., Bruze, M., & Pontén, A. (2018). Wet work exposure and hand eczema among healthcare workers: a cross-sectional study. *The British Journal of Dermatology*, 178(2), 452–461. <https://doi.org/10.1111/bjd.15813>

Han, A. A., Buerger, A. N., Allen, H., Vincent, M., Thornton, S. A., Unice, K. M., Maier, A., & Quiñones-Rivera, A. (2022). Assessment of ethanol exposure from hand sanitizer use and potential for developmental toxicity in nursing infants. *Journal of Applied Toxicology*, 42(9), 1424–1442. <https://doi.org/10.1002/jat.4284>

Han, J. H., Sullivan, N., Leas, B. F., Pegues, D. A., Kaczmarek, J. L., & Umscheid, C. A. (2015). Cleaning hospital room surfaces to prevent health care-associated infections: A technical brief. *Annals of Internal Medicine*, 163(8), 598–607. <https://doi.org/10.7326/M15-1192>

Hatt, S., Schindler, B., Bach, D., & Greene, C. (2020). Washer disinfectant and alkaline detergent efficacy against *C. difficile* on plastic bedpans. *American Journal of Infection Control*, 48(7), 761–764. <https://doi.org/https://doi.org/10.1016/j.ajic.2019.11.028>

Haufroid, V., Merz, B., Hofmann, A., Tschopp, A., Lison, D., & Hotz, P. (2007). Exposure to ethylene oxide in hospitals: Biological monitoring and influence of glutathione S-transferase and epoxide hydrolase polymorphisms. *Cancer Epidemiology Biomarkers and Prevention*, 16(4), 796–802. <https://doi.org/10.1158/1055-9965.EPI-06-0915>

Hautemanière, A., Cunat, L., Ahmed-Lecheheb, D., Hajjard, F., Gerardin, F., Morele, Y., & Hartemann, P. (2013). Assessment of exposure to ethanol vapors released during use of Alcohol-Based Hand Rubs by healthcare workers. *Journal of Infection and Public Health*, 6(1), 16–26. <https://doi.org/https://doi.org/10.1016/j.jiph.2012.09.015>

Hawley, B., Casey, M., Virji, M. A., Cummings, K. J., Johnson, A., & Cox-Ganser, J. (2018). Respiratory symptoms in hospital cleaning staff exposed to a product containing hydrogen peroxide, peracetic acid, and acetic acid. *Annals of Work Exposures and Health*, 62(1), 28–40.

<https://doi.org/10.1093/ANNWEH/WXX087>

- Hawley, B., ML, C., JM, C.-G., Edwards, N., KB, F., & KJ, C. (2016). Notes from the Field: Respiratory Symptoms and Skin Irritation Among Hospital Workers Using a New Disinfection Product - Pennsylvania, 2015. *MMWR. Morbidity and Mortality Weekly Report*, 65(15), 400–401. <https://doi.org/10.15585/mmwr.mm6515a3>
- Heibati, B., Jaakkola, M. S., Lajunen, T. K., Ducatman, A., Veysi, R., Karimi, A., & Jaakkola, J. J. K. (2022). Do hospital workers experience a higher risk of respiratory symptoms and loss of lung function? *BMC Pulmonary Medicine*, 22(1). <https://doi.org/10.1186/s12890-022-02098-5>
- Held, E., Mygind, K., Wolff, C., Gyntelberg, F., & Agner, T. (2002). Prevention of work related skin problems: An intervention study in wet work employees. *Occupational and Environmental Medicine*, 59(8), 556–561. <https://doi.org/10.1136/oem.59.8.556>
- Hell, M., & Pauser, G. (2007). Disinfection for infection prevention over the course of time. *GMS Krankenhaushygiene Interdisziplinär*, 2(1), Doc16. <https://pubmed.ncbi.nlm.nih.gov/20200677/>
- Henn, S., Boiano, J. M., & Steege, A. L. (2015). Precautionary practices of healthcare workers who disinfect medical and dental devices using high-level disinfectants. *Infection Control and Hospital Epidemiology*, 36(2), 180–185. <https://doi.org/10.1017/ice.2014.37>
- Hetzmann, M. S., Mojtahedzadeh, N., Nienhaus, A., Harth, V., & Mache, S. (2021). Occupational health and safety measures in German outpatient care services during the covid-19 pandemic: A qualitative study. *International Journal of Environmental Research and Public Health*, 18(6), 1–17. <https://doi.org/10.3390/ijerph18062987>
- HG, T., TH, L., MA, B., JW, K., & Muniandy, P. (2023). Prevalence of Occupational Hand Eczema among Healthcare Workers and its Associated Risk Factors in a Tertiary Hospital in Sarawak During Covid-19 Pandemic. *Indian Journal of Dermatology*, 68(1), 121. [https://doi.org/10.4103/ijd.ijd\\_803\\_22](https://doi.org/10.4103/ijd.ijd_803_22)
- HH, M. (1971). [Occupational dermatitis in medical personnel]. *Zeitschrift für arztliche Fortbildung*, 65(16), 825–830. <https://pubmed.ncbi.nlm.nih.gov/4401721/>

- HH, M., Baatjies, R., Singh, T., & MF, J. (2021). Asthma Phenotypes and Host Risk Factors Associated With Various Asthma-Related Outcomes in Health Workers. *Frontiers in Allergy*, 2, 747566. <https://doi.org/10.3389/falgy.2021.747566>
- Hildre, T. T., Heiro, H., Sandven, I., & Hammarström, B. (2023). Ambient Environmental Ozone and Variation of Fractional Exhaled Nitric Oxide (FeNO) in Hairdressers and Healthcare Workers. *International Journal of Environmental Research and Public Health*, 20(5). <https://doi.org/10.3390/ijerph20054271>
- HK, V., RJ, B., SHL, L., Morken, T., OJ, M., & Irgens-Hansen, K. (2023). Changes in Infection Prevention Practices and Occurrence of Skin Symptoms among Healthcare Workers, Cleaners and Day-care Workers in Norway during the COVID-19 Pandemic. *Acta Dermato-Venereologica*, 103, adv00840. <https://doi.org/10.2340/actadv.v103.3420>
- Holtjer, J. C. S., Bloemsma, L. D., Beijers, R. J. H. C. G., Cornelissen, M. E. B., Hilvering, B., Houweling, L., Vermeulen, R. C. H., Downward, G. S., & der Zee, A.-H. M. (2023). Identifying risk factors for COPD and adult-onset asthma: an umbrella review. *European Respiratory Review*, 32(168). <https://doi.org/10.1183/16000617.0009-2023>
- Homyer, K. M., & Mehendale, F. V. (2023). Time to rethink medical disinfection from a planetary health perspective. *Journal of Global Health Reports*, 7. <https://doi.org/10.29392/001c.87862>
- Houben, E., K, D. P., & Rogiers, V. (2006). Skin condition associated with intensive use of alcoholic gels for hand disinfection: a combination of biophysical and sensorial data. *Contact Dermatitis*, 54(5), 261–267. <https://doi.org/10.1111/j.0105-1873.2006.00817.x>
- Huang, Y., Huo, S., Mo, J., & Huang, D. (2023). Highly Effective and Broad-Spectrum Antimicrobial Quaternary Ammonium Salts Containing Camphene Structure: Preparation, Surface-Active Properties, and Bioassay. *ACS Omega*. <https://doi.org/10.1021/acsomega.3c03599>
- IA, K., MA, G., MI, R., GS, R., GM, A., & MIu, K. (1995). [Protection of medical personnel hands with Steriprest preparation]. In *Meditisina truda i promyshlennaia ekologiia* (Issue 12, pp. 38–40). <https://pubmed.ncbi.nlm.nih.gov/8673386/>
- Ilyas, S., Srivastava, R. R., & Kim, H. (2020). Disinfection technology and strategies for COVID-19 hospital and bio-medical waste management. *Science of the Total Environment*, 749. <https://doi.org/10.1016/j.scitotenv.2020.141652>



- Ishihara, M., Hata, Y., Hiruma, S., Takayama, T., Nakamura, S., Sato, Y., Ando, N., Fukuda, K., Murakami, K., & Yokoe, H. (2020). Safety of concentrated bioshell calcium oxidewater application for surface and skin disinfections against pathogenic microbes. *Molecules*, 25(19). <https://doi.org/10.3390/molecules25194502>
- Ituen, E., Akaranta, O., Singh, A., & Yuanhua, L. (2021). Overview of Spray Aerosols for Disinfection Against Airborne and Surface Spread of Covid-19. *Letters in Applied NanoBioScience*, 10(3), 2494–2500. <https://doi.org/10.33263/LIANBS103.24942500>
- JA, R., SR, S., Wernicki, P., RR, F., & Charlton, N. (2021). First Aid for Pool Chemical Exposure: A Narrative Review. *Cureus*, 13(7), e16755. <https://doi.org/10.7759/cureus.16755>
- Jacobsen, G., Rasmussen, K., Bregnhøj, A., Isaksson, M., Diepgen, T. L., & Carstensen, O. (2022). Causes of irritant contact dermatitis after occupational skin exposure: a systematic review. *International Archives of Occupational and Environmental Health*, 95(1), 35–65. <https://doi.org/10.1007/s00420-021-01781-0>
- Jann, J., Drevelle, O., Chen, X. G., Auclair-Gilbert, M., Soucy, G., Faucheux, N., & Fortier, L.-C. (2021). Rapid antibacterial activity of anodized aluminum-based materials impregnated with quaternary ammonium compounds for high-touch surfaces to limit transmission of pathogenic bacteria. *RSC Advances*, 11(60), 38172–38188. <https://doi.org/10.1039/d1ra07159a>
- JD, W., AY, L., MC, M., KE, F., AM, N., & RL, N. (2008). Occupational contact urticaria: Australian data. *The British Journal of Dermatology*, 159(1), 125–131. <https://doi.org/10.1111/j.1365-2133.2008.08583.x>
- JE, K., Lash, A., RM, B., Shore, M., & CE, B. (1990). Neuropsychologic “impairment” in a cohort of hospital workers chronically exposed to ethylene oxide. *Journal of Toxicology. Clinical Toxicology*, 28(1), 21–28. <https://doi.org/10.3109/15563659008993473>
- JM, L., Kanerva, M., Tarkka, E., Ollgren, J., & VJ, A. (2022). Low efficacy of three non-alcohol-based hand disinfectants utilizing silver polymer, lactic acid and benzalkonium chloride on inactivation of bacteria on the fingertips of healthcare workers. *The Journal of Hospital Infection*, 125, 55–59. <https://doi.org/10.1016/j.jhin.2022.03.012>
- JM, M., & DN, W. (2016). Occupational Respiratory Allergic Diseases in Healthcare Workers. *Current Allergy and Asthma Reports*, 16(11), 77.

<https://doi.org/10.1007/s11882-016-0657-y>

- Jonsdottir, H. R., Zysset, D., Lenz, N., Siegrist, D., Ruedin, Y., Ryter, S., Züst, R., Geissmann, Y., Ackermann-Gäumann, R., Engler, O. B., & Weber, B. (2023). Virucidal activity of three standard chemical disinfectants against Ebola virus suspended in tripartite soil and whole blood. *Scientific Reports*, *13*(1), 1–8. <https://doi.org/10.1038/s41598-023-42376-8>
- JP, H., Allen, J., Brock, K., Falconer, J., MJ, H., GC, S., & Strohm, B. (1984). Normal sister chromatid exchange levels in hospital sterilization employees exposed to ethylene oxide. *Journal of Occupational Medicine. : Official Publication of the Industrial Medical Association*, *26*(1), 29–32. <https://doi.org/10.1097/00043764-198401000-00007>
- JS, M., TJ, R., AS, H., Carayon, P., ML, Z., Schuetz, V., Reppen, M., Smith, W., Koffarnus, K., RL, B., Bowling, J., Jalali, K., & Safdar, N. (2020). Implementing daily chlorhexidine gluconate treatment for the prevention of healthcare-associated infections in non-intensive care settings: A multiple case analysis. *PloS One*, *15*(4), e0232062. <https://doi.org/10.1371/journal.pone.0232062>
- JW, Y., CJ, H., & RC, S. (1983). Exposure to ethylene oxide at work increases sister chromatid exchanges in human peripheral lymphocytes. *Science (New York, N.Y.)*, *219*(4589), 1221–1223. <https://doi.org/10.1126/science.6828851>
- KA, R., JD, S., Garavito, F., Anderson, B., & JM, I. (2021). Impact of a Whole-Room Atomizing Disinfection System on Healthcare Surface Contamination, Pathogen Transfer, and Labor Efficiency. *Critical Care Explorations*, *3*(2), e0340. <https://doi.org/10.1097/CCE.0000000000000340>
- Kampf, G. (2008). What is left to justify the use of chlorhexidine in hand hygiene? *The Journal of Hospital Infection*, *70*, 27–34. [https://doi.org/10.1016/S0195-6701\(08\)60008-0](https://doi.org/10.1016/S0195-6701(08)60008-0)
- Kampf, G., & Muscatiello, M. (2003). Dermal tolerance of Sterillium, a propanol-based hand rub. *The Journal of Hospital Infection*, *55*(4), 295–298. <https://doi.org/10.1016/j.jhin.2003.09.001>
- Kampf, G., Muscatiello, M., Häntschel, D., & Rudolf, M. (2002). Dermal tolerance and effect on skin hydration of a new ethanol-based hand gel. In *The Journal of hospital infection* (Vol. 52, Issue 4, pp. 297–301). <https://doi.org/10.1053/jhin.2002.1311>

- Kampf, G., Reichel, M., Feil, Y., Eggerstedt, S., & PM, K. (2008). Influence of rub-in technique on required application time and hand coverage in hygienic hand disinfection. *BMC Infectious Diseases*, 8, 149. <https://doi.org/10.1186/1471-2334-8-149>
- Kampf, G., Todt, D., Pfaender, S., & Steinmann, E. (2020). Persistence of coronaviruses on inanimate surfaces and their inactivation with biocidal agents. *Journal of Hospital Infection*, 104(3), 246–251. <https://doi.org/10.1016/j.jhin.2020.01.022>
- Kathare, M., Julander, A., Erfani, B., & Schenk, L. (2022). An Overview of Cleaning Agents' Health Hazards and Occupational Injuries and Diseases Attributed to Them in Sweden. *Annals of Work Exposures and Health*, 66(6), 741–753. <https://doi.org/10.1093/annweh/wxac006>
- Keegel, T., & RL, N. (2018). Wet work and healthcare workers: use of hand disinfectants not associated with self-reported eczema. In *The British journal of dermatology* (Vol. 178, Issue 2, pp. 324–325). <https://doi.org/10.1111/bjd.16166>
- Kieć-Swierczyńska, M. (1996). [Allergic reaction to merthiolate (a disinfectant) based on material from the Occupational Medicine Institute in Lodz]. In *Medycyna pracy* (Vol. 47, Issue 2, pp. 125–131). <https://pubmed.ncbi.nlm.nih.gov/8656996/>
- Kieć-Swierczyńska, M., & Krecisz, B. (2000). Occupational skin diseases among the nurses in the region of Łódź. *International Journal of Occupational Medicine and Environmental Health*, 13(3), 179–184. <https://pubmed.ncbi.nlm.nih.gov/11109741/>
- Kiely, L. F., Moloney, E., O'Sullivan, G., Eustace, J. A., Gallagher, J., & Bourke, J. F. (2021). Irritant contact dermatitis in healthcare workers as a result of the COVID-19 pandemic: a cross-sectional study. *Clinical and Experimental Dermatology*, 46(1), 142–144. <https://doi.org/10.1111/ced.14397>
- Kirman, C. R., Li, A. A., Sheehan, P. J., Bus, J. S., Lewis, R. C., & Hays, S. M. (2021). Ethylene oxide review: characterization of total exposure via endogenous and exogenous pathways and their implications to risk assessment and risk management. *Journal of Toxicology and Environmental Health - Part B: Critical Reviews*, 24(1), 1–29. <https://doi.org/10.1080/10937404.2020.1852988>
- KM, C. (2015). A survey of occupational skin disease in UK health care workers. *Occupational Medicine (Oxford, England)*, 65(1), 29–31. <https://doi.org/10.1093/occmed/kqu170>
- KM, O., & Farooque, S. (2014). Chlorhexidine: an unrecognised cause of anaphylaxis. *Postgraduate Medical Journal*, 90(1070), 709–714.

<https://doi.org/10.1136/postgradmedj-2013-132291>

Kobos, L., Anderson, K., Kurth, L., Liang, X., Groth, C. P., England, L., Laney, A. S., & Virji, M. A. (2022). Characterization of Cleaning and Disinfection Product Use, Glove Use, and Skin Disorders by Healthcare Occupations in a Midwestern Healthcare Facility. *Buildings*, 12(12). <https://doi.org/10.3390/BUILDINGS12122216>

Konno, A., Okubo, T., Enoeda, Y., Uno, T., Sato, T., Yokota, S.-I., Yano, R., & Yamaguchi, H. (2023). Human pathogenic bacteria on high-touch dry surfaces can be controlled by warming to human-skin temperature under moderate humidity. *PLoS ONE*, 18(9). <https://doi.org/10.1371/journal.pone.0291765>

Kovach, C. R., Taneli, Y., Neiman, T., Dyer, E. M., Arzaga, A. J. A., & Kelber, S. T. (2017). Evaluation of an ultraviolet room disinfection protocol to decrease nursing home microbial burden, infection and hospitalization rates. *BMC Infectious Diseases*, 17(1). <https://doi.org/10.1186/s12879-017-2275-2>

Krause, M., & Dolák, F. (2021). Antibacterial treatment of selected high-touch objects and surfaces within provision of nursing care in terms of prevention of healthcare-associated infections. *Healthcare (Switzerland)*, 9(6). <https://doi.org/10.3390/healthcare9060675>

Kruszewska, E., Czupryna, P., Pancewicz, S., Martonik, D., Bukłaha, A., & Moniuszko-Malinowska, A. (2022). Is Peracetic Acid Fumigation Effective in Public Transportation? *International Journal of Environmental Research and Public Health*, 19(5). <https://doi.org/10.3390/ijerph19052526>

KS, I., GB, J., & Agner, T. (2012). Exposures related to hand eczema: a study of healthcare workers. *Contact Dermatitis*, 66(5), 247–253. <https://doi.org/10.1111/j.1600-0536.2011.02027.x>

KS, I., GB, J., LH, G., & Agner, T. (2016). Prevalence of delayed-type and immediate-type hypersensitivity in healthcare workers with hand eczema. *Contact Dermatitis*, 75(4), 223–229. <https://doi.org/10.1111/cod.12587>

KS, I., GB, J., TL, D., Glud, C., J, L. H., Winkel, P., SF, T., & Agner, T. (2012). Skin care education and individual counselling versus treatment as usual in healthcare workers with hand eczema: randomised clinical trial. *BMJ (Clinical Research Ed.)*, 345, e7822.

<https://doi.org/10.1136/bmj.e7822>

Kundrapu, S., Sunkesula, V., LA, J., BM, S., & CJ, D. (2012). Daily disinfection of high-touch surfaces in isolation rooms to reduce contamination of healthcare workers' hands. *Infection Control and Hospital Epidemiology*, 33(10), 1039–1042.

<https://doi.org/10.1086/667730>

Kurth, L., Virji, M. A., Storey, E., Framberg, S., Kallio, C., Fink, J., & Laney, A. S. (2017). Current asthma and asthma-like symptoms among workers at a Veterans Administration Medical Center. *International Journal of Hygiene and Environmental Health*, 220(8), 1325–1332.

<https://doi.org/https://doi.org/10.1016/j.ijheh.2017.09.001>

Laborde-Castérot, H., Villa, A. F., Rosenberg, N., Dupont, P., Lee, H. M., & Garnier, R. (2012). Occupational rhinitis and asthma due to EDTA-containing detergents or disinfectants. *American Journal of Industrial Medicine*, 55(8), 677–682. <https://doi.org/10.1002/AJIM.22036>

Laditka, J. N., Laditka, S. B., Arif, A. A., & Hoyle, J. N. (2020). Work-related asthma in the USA: Nationally representative estimates with extended follow-up. *Occupational and Environmental Medicine*, 77(9), 617–622. <https://doi.org/10.1136/oemed-2019-106121>

Larese Filon, F., Pesce, M., Paulo, M. S., Loney, T., Modenese, A., John, S. M., Kezic, S., & Macan, J. (2021). Incidence of occupational contact dermatitis in healthcare workers: a systematic review. *Journal of the European Academy of Dermatology and Venereology*, 35(6), 1285–1289. <https://doi.org/10.1111/JDV.17096>

Larner, J., Durrant, A., Hughes, P., Mahalingam, D., Rivers, S., Matar, H., Thomas, E., Barrett, M., Pinhal, A., Amer, N., Hall, C., Jackson, T., Catalani, V., & Chilcott, R. P. (2020). Efficacy of Different Hair and Skin Decontamination Strategies with Identification of Associated Hazards to First Responders. *Prehospital Emergency Care*, 24(3), 355–368. <https://doi.org/10.1080/10903127.2019.1636912>

Lee, S., AC, P., MJ, S., & M, van T. (2021). Insufficient respiratory hazard identification in the safety data sheets for cleaning and disinfection products used in healthcare organisations across England and Wales. *Occupational and Environmental Medicine*, 78(4), 293–295.

<https://doi.org/10.1136/oemed-2020-106881>

Lee, S. J., Nam, B., Harrison, R., & Hong, O. (2014). Acute symptoms associated with chemical exposures and safe work practices among hospital

and campus cleaning workers: A pilot study. *American Journal of Industrial Medicine*, 57(11), 1216–1226.

<https://doi.org/10.1002/AJIM.22376>

Lei, H., Jones, R. M., & Li, Y. (2017). Exploring surface cleaning strategies in hospital to prevent contact transmission of methicillin-resistant *Staphylococcus aureus*. *BMC Infectious Diseases*, 17(1). <https://doi.org/10.1186/s12879-016-2120-z>

Leinster, P., Baum, J. M., & Baxter, P. J. (1993). An assessment of exposure to glutaraldehyde in hospitals: Typical exposure levels and recommended control measures. *British Journal of Industrial Medicine*, 50(2), 107–111. <https://doi.org/10.1136/oem.50.2.107>

Lemire, P., Chevallier, E., Lyon-Caen, S., Sévin, E., Boudier, A., Da Silva, E. P., De Thuin, C., Slama, R., Dumas, O., Siroux, V., Le Moual, N., Eyriey, E., Licinia, A., Vellement, A., Pin, I., Hoffmann, P., Hullo, E., Llerena, C., Morin, X., ... Slama, R. (2022). Association between household cleaning product profiles evaluated by the Ménag'Score® index and asthma symptoms among women from the SEPAGES cohort. *International Archives of Occupational and Environmental Health*. <https://doi.org/10.1007/s00420-022-01860-w>

Li, R. W. H., Lipszyc, J. C., Prasad, S., & Tarlo, S. M. (2018). Work-related asthma from cleaning agents versus other agents. *Occupational Medicine*, 68(9), 587–592. <https://doi.org/10.1093/OCCMED/KQY137>

Lin, N., Rosemberg, M.-A., Li, W., Meza-Wilson, E., Godwin, C., & Batterman, S. (2021). Occupational exposure and health risks of volatile organic compounds of hotel housekeepers: Field measurements of exposure and health risks. *Indoor Air*, 31(1), 26–39. <https://doi.org/10.1111/ina.12709>

Liss, G. M., Tarlo, S. M., Doherty, J., Purdham, J., Greene, J., McCaskell, L., & Kerr, M. (2003). Physician diagnosed asthma, respiratory symptoms, and associations with workplace tasks among radiographers in Ontario, Canada. *Occupational and Environmental Medicine*, 60(4), 254–261. <https://doi.org/10.1136/oem.60.4.254>

Lodola, L., Bernardini, G., Riva, A., & Marraccini, P. (2000). [Evaluation and quantification of biologic risk in the hospital setting with ATP determination on work surfaces]. In *Giornale italiano di medicina del lavoro ed ergonomia* (Vol. 22, Issue 1, pp. 7–13). <https://pubmed.ncbi.nlm.nih.gov/10771752/>

- Lu, Y., Cai, R., Xie, Z., Gao, X., Huang, X., Xu, J., Li, Y., & Hu, G. (2022). Current Status and Factors Associated with Clean Operating Rooms: A Survey of Hospitals in China. *Journal of Healthcare Engineering*, 2022. <https://doi.org/10.1155/2022/8749785>
- Lu, Y., Li, S., Xu, W., & Wang, Y. (2023). Numerical Simulation Study of Indoor Disinfection Spray Distribution based on CFD-DPM Method. *Journal of Engineering Research*. <https://doi.org/https://doi.org/10.1016/j.jer.2023.10.039>
- Luchini, K., SNB, S., Mauro, R., Sargsyan, A., Newman, A., Persaud, P., Hawkins, D., Wolff, D., Staudinger, J., & BA, C. (2021). Sterilization and sanitizing of 3D-printed personal protective equipment using polypropylene and a Single Wall design. *3D Printing in Medicine*, 7(1), 16. <https://doi.org/10.1186/s41205-021-00106-8>
- MA, da S., PB, G., & SH, M. (1997). [Perception of health professionals of the risk of chemical exposure]. In *Revista brasileira de enfermagem* (Vol. 50, Issue 4, pp. 591–598). <https://doi.org/10.1590/s0034-71671997000400013>
- MA, G. J., A, M. H., JC, A. G., M, L. A., L, M. O., P, T. M., & X, E. O. (2013). Exposure of health workers in primary health care to glutaraldehyde. *Journal of Occupational Medicine and Toxicology (London, England)*, 8(1), 31. <https://doi.org/10.1186/1745-6673-8-31>
- Mac Hovcová, A., Fenclová, Z., & Pelclová, D. (2013). Occupational skin diseases in Czech healthcare workers from 1997 to 2009. *International Archives of Occupational and Environmental Health*, 86(3), 289–294. <https://doi.org/10.1007/S00420-012-0764-6/FIGURES/2>
- Maier, A., Ovesen, J. L., Allen, C. L., York, R. G., Gadagbui, B. K., Kirman, C. R., Poet, T., & Quiñones-Rivera, A. (2015). Safety assessment for ethanol-based topical antiseptic use by health care workers: Evaluation of developmental toxicity potential. *Regulatory Toxicology and Pharmacology*, 73(1), 248–264. <https://doi.org/10.1016/j.yrtph.2015.07.015>
- Małaszuk, J., Andrzejak, R., Przybylski, M., Jurga, M., Szymańska, A., & Leszczyszyn, J. (2000). [Preliminary assessment of occupational exposure to Glutaraldehyde in selected endoscopic workplaces]. In *Medycyna pracy* (Vol. 51, Issue 4, pp. 365–371). <https://pubmed.ncbi.nlm.nih.gov/11059410/>
- Mallakpour, S., Azadi, E., & Hussain, C. M. (2021). Protection, disinfection, and immunization for healthcare during the COVID-19 pandemic: Role of natural and synthetic macromolecules. *Science of the Total Environment*, 776. <https://doi.org/10.1016/j.scitotenv.2021.145989>

- Manyele, S. V, Ngonyani, H. A., & Eliakimu, E. (2008). The status of occupational safety among health service providers in hospitals in Tanzania. *Tanzania Journal of Health Research*, 10(3), 159–165. <https://doi.org/10.4314/thrb.v10i3.14356>
- Marena, C., Lodola, L., Zecca, M., Bulgheroni, A., Carretto, E., Maserati, R., & Zambianchi, L. (2002). Assessment of handwashing practices with chemical and microbiologic methods: preliminary results from a prospective crossover study. In *American journal of infection control* (Vol. 30, Issue 6, pp. 334–340). <https://doi.org/10.1067/mic.2002.125809>
- Matulonga, B., Rava, M., Siroux, V., Bernard, A., Dumas, O., Pin, I., Zock, J.-P., Nadif, R., Leynaert, B., & Le Moual, N. (2016). Women using bleach for home cleaning are at increased risk of non-allergic asthma. *Respiratory Medicine*, 117, 264–271. <https://doi.org/10.1016/j.rmed.2016.06.019>
- McKinley, L., CC, G., Balkenende, E., Clore, G., SS, H., Bartel, R., Bradley, S., Judd, J., Lyons, G., Rock, C., Rubin, M., Shaughnessy, C., HS, R., Perencevich, E., & Safdar, N. (2023). Evaluation of daily environmental cleaning and disinfection practices in veterans affairs acute and long-term care facilities: A mixed methods study. *American Journal of Infection Control*, 51(2), 205–213. <https://doi.org/10.1016/j.ajic.2022.05.014>
- Mehtar, S., Bulabula, A. N. H., Nyandemoh, H., & Jambawai, S. (2016). Deliberate exposure of humans to chlorine-the aftermath of Ebola in West Africa. *Antimicrobial Resistance and Infection Control*, 5(1). <https://doi.org/10.1186/S13756-016-0144-1>
- Melgar, M., Ramirez, M., Chang, A., & Antillon, F. (2022). Impact of dry hydrogen peroxide on hospital-acquired infection at a pediatric oncology hospital. *WHO Special Issue: Personal Protective Equipment Research and Innovation in the Context of the World Health Organization COVID-19 R&D Blueprint Program*, 50(8), 909–915. <https://doi.org/https://doi.org/10.1016/j.ajic.2021.12.010>
- Mirabelli, M. C., Zock, J.-P., Plana, E., Antó, J. M., Benke, G., Blanc, P. D., Dahlman-Höglund, A., Jarvis, D. L., Kromhout, H., Lillienberg, L., Norbäck, D., Olivieri, M., Radon, K., Sunyer, J., Torén, K., Van Sprundel, M., Villani, S., & Kogevinas, M. (2007). Occupational risk factors for asthma among nurses and related healthcare professionals in an international study. *Occupational and Environmental Medicine*, 64(7), 474–479. <https://doi.org/10.1136/oem.2006.031203>
- Moccia, G., Motta, O., Pironti, C., Proto, A., Capunzo, M., & De Caro, F. (2020). An alternative approach for the decontamination of hospital



- settings. *Journal of Infection and Public Health*, 13(12), 2038–2044. <https://doi.org/10.1016/j.jiph.2020.09.020>
- Mohite, V. S., Darade, M. M., Sharma, R. K., & Pawar, S. H. (2022). Nanoparticle Engineered Photocatalytic Paints: A Roadmap to Self-Sterilizing against the Spread of Communicable Diseases. *Catalysts*, 12(3). <https://doi.org/10.3390/catal12030326>
- Mohtar, N., Gazzali, A. M., Parumasivam, T., Hanafiah, N. H. M., & Yee, N. S. (2021). Proof of concept: The effectiveness of disinfectant tunnel as potential measure against COVID-19. *Sains Malaysiana*, 50(7), 2135–2140. <https://doi.org/10.17576/jsm-2021-5007-26>
- Molin, S., Bauer, A., Schnuch, A., & Geier, J. (2015). Occupational contact allergy in nurses: results from the Information Network of Departments of Dermatology 2003-2012. *Contact Dermatitis*, 72(3), 164–171. <https://doi.org/10.1111/cod.12330>
- MS, S., TA, G., & SM, M. (2006). Efficacy of an alcohol-based healthcare hand rub containing synergistic combination of farnesol and benzethonium chloride. In *International journal of hygiene and environmental health* (Vol. 209, Issue 5, pp. 477–487). <https://doi.org/10.1016/j.ijheh.2006.04.006>
- Mungan, D., Özmen, İ., Evyapan, F., Topçu, F., Akgün, M., Arbak, P., & Bülbül, Y. (2019). Work-related symptoms of patients with asthma: A multicenter study. *Turkish Thoracic Journal*, 20(4), 241–247. <https://doi.org/10.5152/TurkThoracJ.2018.18123>
- Munyendo, W. L. L., & Kiprof, A. K. (2016). Design, preparation and evaluation of germicidal *Toddalia asiatica* herbal antiseptic detergent. *Journal of Applied Pharmaceutical Science*, 6(11), 100–104. <https://doi.org/10.7324/JAPS.2016.601116>
- MV, T., Jarboe, G., & RQ, F. (2008). Infection control in the dental office. *Dental Clinics of North America*, 52(3), 609–628, x. <https://doi.org/10.1016/j.cden.2008.02.002>
- Mwanga, H. H., Baatjies, R., & Jeebhay, M. F. (2022). Characterization of Exposure to Cleaning Agents Among Health Workers in Two Southern African Tertiary Hospitals. *Annals of Work Exposures and Health*, 66(8), 998–1009. <https://doi.org/10.1093/annweh/wxac034>
- Mwanga, H. H., Baatjies, R., & Jeebhay, M. F. (2023). Occupational risk factors and exposure-response relationships for airway disease among health workers exposed to cleaning agents in tertiary hospitals. *Occupational and Environmental Medicine*. <https://doi.org/10.1136/OEMED-2022-108763>

- Nakamura, S., Ishihara, M., Sato, Y., Takayama, T., Hiruma, S., Ando, N., Fukuda, K., Murakami, K., & Yokoe, H. (2020). Concentrated bioshell calcium oxide (BiSCaO) water kills pathogenic microbes: Characterization and activity. *Molecules*, 25(13).  
<https://doi.org/10.3390/molecules25133001>
- Navarathna, T., Jinadatha, C., Corona, B. A., Coppin, J. D., Choi, H., Bennett, M. R., Ghamande, G. S., Williams, M. D., Keene, R. E., & Chatterjee, P. (2023). Efficacy of a filtered far-UVC handheld disinfection device in reducing the microbial bioburden of hospital surfaces. *American Journal of Infection Control*. <https://doi.org/10.1016/j.ajic.2023.05.003>
- Nayebzadeh, A. (2007). The effect of work practices on personal exposure to glutaraldehyde among health care workers. *Industrial Health*, 45(2), 289–295. <https://doi.org/10.2486/INDHEALTH.45.289>
- Ndlela, N. H., & Naidoo, R. N. (2023). Job and exposure intensity among hospital cleaning staff adversely affects respiratory health. *American Journal of Industrial Medicine*, 66(3), 252–264. <https://doi.org/10.1002/AJIM.23456>
- Nemli, A., Gümüş, K., & Başer, M. (2021). Ergoophthalmological risks associated with dry eye in the operating room. *Journal of Perioperative Nursing*, 34(2), e-22. <https://doi.org/10.26550/2209-1092.1115>
- Nettis, E., Colanardi, M. C., Soccio, A. L., Ferrannini, A., & Tursi, A. (2002). Occupational irritant and allergic contact dermatitis among healthcare workers. *Contact Dermatitis*, 46(2), 101–107. <https://doi.org/10.1034/J.1600-0536.2002.460208.X>
- Neves, P. R. F., Oliveira, T. D., Magalhães, T. F., Dos Reis, P. R. S., Tofaneli, L. A., Santos, A. A. B., Souza Machad, B., Oliveira, F. O., Da Silva Andrade, L. P. C., Badaro, R., & Mascarenhas, L. A. B. (2021). Numerical and experimental analyses for the improvement of surface instant decontamination technology through biocidal agent dispersion: Potential of application during pandemic. *PLoS ONE*, 16(5).  
<https://doi.org/10.1371/journal.pone.0251817>
- Nguyen, K., Bui, D., Hashemi, M., Hocking, D. M., Mendis, P., Strugnell, R. A., & Dharmage, S. C. (2021). The potential use of hypochlorous acid and a smart prefabricated sanitising chamber to reduce occupation-related COVID-19 exposure. *Risk Management and Healthcare Policy*, 14, 247–252. <https://doi.org/10.2147/RMHP.S284897>

- Nielsen, J., & Bach, E. (1999). Work-related eye symptoms and respiratory symptoms in female cleaners. *Occupational Medicine*, 49(5), 291–297. <https://doi.org/10.1093/occmed/49.5.291>
- Norbäck, D. (1988). Skin and respiratory symptoms from exposure to alkaline glutaraldehyde in medical services. *Scandinavian Journal of Work, Environment & Health*, 14(6), 366–71. <https://www.jstor.org/stable/40965592>
- Obed, P., Amritanand, A., Antipas, O., Rebekah, G., Kirupakaran, H., Alex, R., & Paul, P. (2021). Acute work-related hazardous eye exposures in a health care environment - An observational study from a tertiary care hospital in South India. *Indian Journal of Ophthalmology*, 69(12), 3532–3537. [https://doi.org/10.4103/ijo.IJO\\_912\\_21](https://doi.org/10.4103/ijo.IJO_912_21)
- Ofstead, C. L., Hopkins, K. M., Daniels, F. E., Smart, A. G., & Wetzler, H. P. (2022). Splash generation and droplet dispersal in a well-designed, centralized high-level disinfection unit. *American Journal of Infection Control*, 50(11), 1200–1207. <https://doi.org/https://doi.org/10.1016/j.ajic.2022.08.016>
- Oie, S., Obayashi, A., Yamasaki, H., Furukawa, H., Kenri, T., Takahashi, M., Kawamoto, K., & Makino, S.-I. (2011). Disinfection methods for spores of *Bacillus atrophaeus*, *B. anthracis*, *Clostridium tetani*, *C. botulinum* and *C. difficile*. *Biological and Pharmaceutical Bulletin*, 34(8), 1325–1329. <https://doi.org/10.1248/bpb.34.1325>
- Okazaki, K., Fujino, Y., & Morikawa, Y. (2022). Effects of ultra-pure soft water on the hands of nurses in a neonatal intensive care unit: A randomized crossover study. *Contact Dermatitis*, 87(6), 521–527. <https://doi.org/10.1111/cod.14177>
- Okeke, C. A. V., Khanna, R., & Ehrlich, A. (2023). Quaternary Ammonium Compounds and Contact Dermatitis: A Review and Considerations During the COVID-19 Pandemic. *Clinical, Cosmetic and Investigational Dermatology*, 16, 1721–1728. <https://doi.org/10.2147/CCID.S410910>
- Omrane, A., Khedher, A., Harrathi, C., Maoua, M., Khalfallah, T., Bouzgarrou, L., Mrizak, N., MA, H., & HBH, A. (2022). Quality of Life of Healthcare Workers Suffering from Occupational Contact Dermatitis. *Recent Advances in Inflammation & Allergy Drug Discovery*, 15(1), 44–51. <https://doi.org/10.2174/1872213X14666210303155135>

- Ortí-Lucas, R. M., & Muñoz-Miguel, J. (2017). Effectiveness of surface coatings containing silver ions in bacterial decontamination in a recovery unit. *Antimicrobial Resistance and Infection Control*, 6(1). <https://doi.org/10.1186/s13756-017-0217-9>
- Otterspoor, S., & Farrell, J. (2019). An evaluation of buffered peracetic acid as an alternative to chlorine and hydrogen peroxide based disinfectants. *Infection, Disease & Health*, 24(4), 240–243. <https://doi.org/10.1016/J.IDH.2019.06.003>
- Oza, H. H., Lee, M. G., Boisson, S., Pega, F., Medlicott, K., & Clasen, T. (2022). Occupational health outcomes among sanitation workers: A systematic review and meta-analysis. *International Journal of Hygiene and Environmental Health*, 240, 113907. <https://doi.org/https://doi.org/10.1016/j.ijheh.2021.113907>
- PA, S., Boeniger, M., JT, W., SE, S., MA, P., DK, G., JP, W., Garza, A., Froelich, R., Strauss, G., & al., et. (1992). Biologic markers in hospital workers exposed to low levels of ethylene oxide. *Mutation Research*, 278(4), 237–251. [https://doi.org/10.1016/s0165-1218\(10\)80003-5](https://doi.org/10.1016/s0165-1218(10)80003-5)
- Pałczyński, C., Walusiak, J., Ruta, U., & Górski, P. (2001). Occupational asthma and rhinitis due to glutaraldehyde: changes in nasal lavage fluid after specific inhalatory challenge test. In *Allergy* (Vol. 56, Issue 12, pp. 1186–1191). <https://doi.org/10.1034/j.1398-9995.2001.00236.x>
- Parry, M. F., Sestovic, M., Renz, C., Pangan, A., Grant, B., & Shah, A. K. (2022). Environmental cleaning and disinfection: Sustaining changed practice and improving quality in the community hospital. *Antimicrobial Stewardship and Healthcare Epidemiology*, 2(1). <https://doi.org/10.1017/ash.2022.257>
- Patel, J., Gimeno Ruiz de Porras, D., Mitchell, L. E., Carson, A., Whitehead, L. W., Han, I., Pompeii, L., Conway, S., Zock, J.-P., Henneberger, P. K., Patel, R., De Los Reyes, J., & Delclos, G. L. (2023). Cleaning Tasks and Products and Asthma Among Healthcare Professionals. *Journal of Occupational & Environmental Medicine*. <https://doi.org/10.1097/JOM.0000000000002990>
- PE, H., BA, R., & LC, L. (1990). Ethylene oxide. An occupational health hazard for hospital workers. *AORN Journal*, 51(2), 480-481,483,485-486. [https://doi.org/10.1016/s0001-2092\(07\)66079-7](https://doi.org/10.1016/s0001-2092(07)66079-7)
- Pechter, E., Davis, L. K., Tumpowsky, C., Flattery, J., Harrison, R., Reinisch, F., Reilly, M. J., Rosenman, K. D., Schill, D. P., Valiante, D., & Filios, M. (2005). Work-related asthma among health care workers: Surveillance data from California, Massachusetts, Michigan, and New

- Jersey, 1993-1997. *American Journal of Industrial Medicine*, 47(3), 265–275. <https://doi.org/10.1002/ajim.20138>
- Pemberton, M. A., & Kimber, I. (2021). Classification of chemicals as respiratory allergens based on human data: Requirements and practical considerations. *Regulatory Toxicology and Pharmacology*, 123. <https://doi.org/10.1016/j.yrtph.2021.104925>
- Peters, A., Cave, C., Carry, J., Sauser, J., & Pittet, D. (2022). Tolerability and acceptability of three alcohol-based hand-rub gel formulations: a randomized crossover study. *The Journal of Hospital Infection*, 123, 112–118. <https://doi.org/10.1016/j.jhin.2022.01.019>
- Petti, S., Messano, G. A., Polimeni, A., & Dancer, S. J. (2013). Effect of cleaning and disinfection on naturally contaminated clinical contact surfaces. *Acta Stomatologica Naissi*, 29(67), 1265–1272. <https://doi.org/10.5937/asn1367265P>
- Peyneau, M., de Chaisemartin, L., Gigant, N., Chollet-Martin, S., & Kerdine-Römer, S. (2022). Quaternary ammonium compounds in hypersensitivity reactions. *Frontiers in Toxicology*, 4. <https://doi.org/10.3389/ftox.2022.973680>
- Pironti, C., Motta, O., & Proto, A. (2021). Development of a new vapour phase methodology for textiles disinfection. *Cleaner Engineering and Technology*, 4. <https://doi.org/10.1016/j.clet.2021.100170>
- Polecka, A., Awchimkow, A., Owsianko, N., Baran, A., Hermanowicz, J. M., & Flisiak, I. (2023). Hand Eczema in the Polish Female Population. *Journal of Clinical Medicine*, 12(18). <https://doi.org/10.3390/jcm12186102>
- Polivka, B. J., Huntington-Moskos, L., Folz, R., & Barnett, R. (2022). CE: Environments & Health: Chemicals in the Home That Can Exacerbate Asthma. *American Journal of Nursing*, 122(5), 34–39. <https://doi.org/10.1097/01.NAJ.0000829776.73698.e0>
- Pontes, F., Pontes, H., Adachi, P., Rodini, C., Almeida, D., & Jr, P. D. (2008). Gingival and bone necrosis caused by accidental sodium hypochlorite injection instead of anaesthetic solution. In *International endodontic journal* (Vol. 41, Issue 3, pp. 267–270). <https://doi.org/10.1111/j.1365-2591.2007.01340.x>
- Popin, E., MC, K.-K., Gonzalez, M., Brom, M., Flesch, F., & Pauli, G. (2008). [The Incidence of occupational asthma in Alsace from 2001 to 2002. Results of intensification of the ONAP project in Alsace (2001-2002). Regional specificities]. In *Revue des maladies respiratoires* (Vol. 25, Issue 7, pp. 806–813). [https://doi.org/10.1016/s0761-8425\(08\)74345-6](https://doi.org/10.1016/s0761-8425(08)74345-6)

- Popp, W., Vahrenholz, C., Przygoda, H., Brauksiepe, A., Goch, S., Müller, G., Schell, C., & Norpoth, K. (1994). DNA-protein cross-links and sister chromatid exchange frequencies in lymphocytes and hydroxyethyl mercapturic acid in urine of ethylene oxide-exposed hospital workers. *International Archives of Occupational and Environmental Health*, 66(5), 325–332. <https://doi.org/10.1007/BF00378365>
- Prodi, A., Rui, F., AB, F., MT, C., & FL, F. (2016). Healthcare workers and skin sensitization: north-eastern Italian database. *Occupational Medicine (Oxford, England)*, 66(1), 72–74. <https://doi.org/10.1093/occmed/kqv139>
- Prodi, A., Rui, F., Fortina, A. B., Corradin, M. T., & Filon, F. L. (2016). Healthcare workers and skin sensitization: North-eastern Italian database. *Occupational Medicine*, 66(1), 72–74. <https://doi.org/10.1093/occmed/kqv139>
- Purwar, T., Dey, S., Al-Kayyali, O. Z. A., Zalar, A. F., Doosttalab, A., Castillo, L., & Castano, V. M. (2022). Electrostatic Spray Disinfection Using Nano-Engineered Solution on Frequently Touched Surfaces in Indoor and Outdoor Environments. *International Journal of Environmental Research and Public Health*, 19(12). <https://doi.org/10.3390/ijerph19127241>
- Quinn, M. M., Henneberger, P. K., Braun, B., Delclos, G. L., Fagan, K., Huang, V., Knaack, J. L. S., Kusek, L., Lee, S.-J., Le Moual, N., Maher, K. A. E., McCrone, S. H., Mitchell, A. H., Pechter, E., Rosenman, K., Schulster, L., Stephens, A. C., Wilburn, S., & Zock, J.-P. (2015). Cleaning and disinfecting environmental surfaces in health care: Toward an integrated framework for infection and occupational illness prevention. *American Journal of Infection Control*, 43(5), 424–434. <https://doi.org/https://doi.org/10.1016/j.ajic.2015.01.029>
- Quinot, C., Amsellem-Dubourget, S., Temam, S., Sevin, E., Barreto, C., Tackin, A., Félicité, J., Lyon-Caen, S., Siroux, V., Girard, R., Descatha, A., N, L. M., & Dumas, O. (2018). Development of a bar code-based exposure assessment method to evaluate occupational exposure to disinfectants and cleaning products: a pilot study. In *Occupational and environmental medicine* (Vol. 75, Issue 9, pp. 668–674). <https://doi.org/10.1136/oemed-2017-104793>
- Quinot, C., Dumas, O., Henneberger, P. K., Varraso, R., Wiley, A. S., Speizer, F. E., Goldberg, M., Zock, J. P., Camargo, C. A., & Le Moual, N. (2017). Development of a job-task-exposure matrix to assess occupational exposure to disinfectants among US nurses. *Occupational and Environmental Medicine*, 74(2), 130–137. <https://doi.org/10.1136/oemed-2016-103606>
- Rai, R., El-Zaemey, S., Dorji, N., & Fritschi, L. (2020a). Occupational exposures to hazardous chemicals and agents among healthcare workers in

Bhutan. *American Journal of Industrial Medicine*, 63(12), 1109–1115. <https://doi.org/10.1002/ajim.23192>

Rai, R., El-Zaemey, S., Dorji, N., & Fritschi, L. (2020b). Reliability and validity of an adapted questionnaire assessing occupational exposures to hazardous chemicals among health care workers in Bhutan. *International Journal of Occupational and Environmental Medicine*, 11(3), 128–139. <https://doi.org/10.34172/ijoem.2020.1878>

Rangel, K., Cabral, F. O., Lechuga, G. C., Villas-Bôas, M. H. S., Midlej, V., & De-Simone, S. G. (2022). Effectiveness Evaluation of a UV-C-Photoinactivator against Selected ESKAPE-E Pathogens. *International Journal of Environmental Research and Public Health*, 19(24). <https://doi.org/10.3390/ijerph192416559>

Rava, M., Ahmed, I., Kogevinas, M., Le Moual, N., Bouzigon, E., Curjuric, I., Dizier, M.-H., Dumas, O., Gonzalez, J. R., Imboden, M., Mehta, A. J., Tubert-Bitter, P., Zock, J.-P., Jarvis, D., Probst-Hensch, N. M., Demenais, F., & Nadif, R. (2017). Genes interacting with occupational exposures to low molecular weight agents and irritants on adult-onset asthma in three European studies. *Environmental Health Perspectives*, 125(2), 207–214. <https://doi.org/10.1289/EHP376>

Razali, A., FI, A., & AM, K. A. (2022). Development and validation of Malaysian noise and chemical exposure questionnaire towards hearing among hospital workers. *The Medical Journal of Malaysia*, 77(4), 420–426. <https://pubmed.ncbi.nlm.nih.gov/35902930/>

Restrepo, A. V., Valderrama, M. P., Correa, A. L., Mazo, L. M., González, N. E., & Jaimes, F. (2014). Implementation of the strategy “clean care is safer care” in a third level hospital in Medellín, Colombia. *Revista Chilena de Infectología*, 31(3), 280–286. <https://doi.org/10.4067/S0716-10182014000300005>

Ricke, I. J., Oglesby, A., Lyden, G. R., Barrett, E. S., Moe, S., & Nguyen, R. H. N. (2022). Knowledge, Attitudes, and Behaviors Regarding Chemical Exposure among a Population Sample of Reproductive-Aged Women. *International Journal of Environmental Research and Public Health*, 19(5). <https://doi.org/10.3390/ijerph19053015>

Rideout, K., Teschke, K., Dimich-Ward, H., & SM, K. (2005). Considering risks to healthcare workers from glutaraldehyde alternatives in high-level disinfection. *The Journal of Hospital Infection*, 59(1), 4–11. <https://doi.org/10.1016/j.jhin.2004.07.003>

- Rivers, J. K., Arlette, J. P., DeKoven, J., Guenther, L. C., Muhn, C., Richer, V., Rosen, N., Tremblay, J.-F., Wiseman, M. C., Zip, C., & Zloty, D. (2021). Skin care and hygiene among healthcare professionals during and after the SARS-CoV-2 pandemic. *SAGE Open Medicine*, 9. <https://doi.org/10.1177/20503121211062795>
- Roberts, M., Thygeson, S. M., Beard, J. D., Clark, C., & Montague, E. (2022). Occupational safety and health guidelines in relation to COVID-19 risk, death risk, and case-fatality proportion: An international, ecological study. *Health Science Reports*, 5(2). <https://doi.org/10.1002/hsr2.539>
- Robinson, G. L., Hitchcock, S., Kpadeh-Rogers, Z., Karikari, N., Johnson, J. K., Blanco, N., Morgan, D. J., Harris, A. D., & Leekha, S. (2019). Preventing Viral Contamination: Effects of Wipe and Spray-based Decontamination of Gloves and Gowns. *Clinical Infectious Diseases*, 69, S228–S230. <https://doi.org/10.1093/cid/ciz622>
- Rock, C., Hsu, Y. J., Curless, M. S., Carroll, K. C., Ross Howard, T., Carson, K. A., Cummings, S., Anderson, M., Milstone, A. M., & Maragakis, L. L. (2022). Ultraviolet-C Light Evaluation as Adjunct Disinfection to Remove Multidrug-Resistant Organisms. *Clinical Infectious Diseases*, 75(1), 35–40. <https://doi.org/10.1093/cid/ciab896>
- Rogers, C. A., Gaskin, S. E., Thredgold, L. D., & Pukala, T. L. (2023). An approach to quantify ortho-phthalaldehyde contamination on work surfaces. *Annals of Work Exposures and Health*, 67(7), 886–894. <https://doi.org/10.1093/annweh/wxad039>
- Rollins, S. M., Su, F.-C., Liang, X., Humann, M. J., Stefaniak, A. B., LeBouf, R. F., Stanton, M. L., Virji, M. A., & Henneberger, P. K. (2020). Workplace indoor environmental quality and asthma-related outcomes in healthcare workers. *American Journal of Industrial Medicine*, 63(5), 417–428. <https://doi.org/10.1002/ajim.23101>
- Rose, M. A., Garcez, T., Savic, S., & Garvey, L. H. (2019). Chlorhexidine allergy in the perioperative setting: a narrative review. *British Journal of Anaesthesia*, 123(1), e95–e103. <https://doi.org/10.1016/j.bja.2019.01.033>
- Rustemeyer, T., Pilz, B., & PJ, F. (1994). [Contact allergies in medical occupations]. In *Der Hautarzt; Zeitschrift fur Dermatologie, Venerologie, und verwandte Gebiete* (Vol. 45, Issue 12, pp. 834–844). <https://doi.org/10.1007/s001050050182>



- Rutala, W. A., & Weber, D. J. (2016). Monitoring and improving the effectiveness of surface cleaning and disinfection. *American Journal of Infection Control*, 44(5), e69–e76. <https://doi.org/10.1016/j.ajic.2015.10.039>
- Rutala, W. A., & Weber, D. J. (2019). Best practices for disinfection of noncritical environmental surfaces and equipment in health care facilities: A bundle approach. *American Journal of Infection Control*, 47, A96–A105. <https://doi.org/10.1016/j.ajic.2019.01.014>
- Rybka, A., Gavel, A., Kroupa, T., Meloun, J., Prazak, P., Draessler, J., Pavlis, O., Kubickova, P., Kratzerova, L., & Pejchal, J. (2021). Peracetic acid-based disinfectant is the most appropriate solution for a biological decontamination procedure of responders and healthcare workers in the field environment. *Journal of Applied Microbiology*, 131(3), 1240–1248. <https://doi.org/10.1111/jam.15041>
- Saito, R., Abbas Virji, M., Henneberger, P. K., Humann, M. J., Lebouf, R. F., Stanton, M. L., Liang, X., & Stefaniak, A. B. (2015). Characterization of cleaning and disinfecting tasks and product use among hospital occupations. *American Journal of Industrial Medicine*, 58(1), 101–111. <https://doi.org/10.1002/ajim.22393>
- Salomone, A., Bozzo, A., Di Corcia, D., Gerace, E., & Vincenti, M. (2018). Occupational exposure to alcohol-based hand sanitizers: The diagnostic role of alcohol biomarkers in hair. *Journal of Analytical Toxicology*, 42(3), 157–162. <https://doi.org/10.1093/jat/bkx094>
- Sanguinet, J., & Edmiston, C. (2021). Evaluation of dry hydrogen peroxide in reducing microbial bioburden in a healthcare facility. *American Journal of Infection Control*, 49(8), 985–990. <https://doi.org/10.1016/j.ajic.2021.03.004>
- Santovito, A., Cervella, P., & Delpero, M. (2014). Chromosomal damage in peripheral blood lymphocytes from nurses occupationally exposed to chemicals. *Human & Experimental Toxicology*, 33(9), 897–903. <https://doi.org/10.1177/0960327113512338>
- Sattar, S. A., Bradley, C., Kibbee, R., Wesgate, R., Wilkinson, M. A. C., Sharpe, T., & Maillard, J.-Y. (2015). Disinfectant wipes are appropriate to control microbial bioburden from surfaces: Use of a new ASTM standard test protocol to demonstrate efficacy. *Journal of Hospital Infection*, 91(4), 319–325. <https://doi.org/10.1016/j.jhin.2015.08.026>
- Sauvé, J.-F., & Friesen, M. C. (2019). Using Decision Rules to Assess Occupational Exposure in Population-Based Studies. *Current Environmental Health Reports*, 6(3), 148–159. <https://doi.org/10.1007/s40572-019-00240-w>

- Schäferhenrich, A., Blümlein, K., Koch, W., Hahn, S., Schwarz, K., Poppek, U., Hebisch, R., Schlüter, U., Krug, M., & Göen, T. (2023). Inhalation and dermal exposure to biocidal products during foam and spray applications. *Annals of Work Exposures and Health*, 67(7), 858–875. <https://doi.org/10.1093/annweh/wxad037>
- Scheepers, P. T. J., Van Wel, L., Beckmann, G., & Anzion, R. B. M. (2017). Chemical characterization of the indoor air quality of a university hospital: Penetration of outdoor air pollutants. *International Journal of Environmental Research and Public Health*, 14(5). <https://doi.org/10.3390/ijerph14050497>
- Schnell, E., Karamooz, E., Harriff, M. J., Yates, J. E., Pfeiffer, C. D., & Smith, S. M. (2021). Construction and validation of an ultraviolet germicidal irradiation system using locally available components. *PLoS ONE*, 16. <https://doi.org/10.1371/journal.pone.0255123>
- Schnuch, A., Uter, W., Geier, J., Frosch, P. J., & Rustemeyer, T. (1998). Contact allergies in healthcare workers. Results from the IVDK. *Acta Dermato-Venereologica*, 78(5), 358–363. <https://doi.org/10.1080/000155598443060>
- Schöbel, H., Diem, G., Kiechl, J., Chisté, D., Bertacchi, G., Mayr, A., Wilflingseder, D., Lass-Flörl, C., & Posch, W. (2023). Antimicrobial efficacy and inactivation kinetics of a novel LED-based UV-irradiation technology. *Journal of Hospital Infection*, 135, 11–17. <https://doi.org/10.1016/j.jhin.2022.12.023>
- Schulte, P. A., Pandalai, S., Wulsin, V., & Chun, H. K. (2012). Interaction of occupational and personal risk factors in workforce health and safety. *American Journal of Public Health*, 102(3), 434–448. <https://doi.org/10.2105/AJPH.2011.300249>
- Sedeh, F. B., Michaelsdóttir, T. E., Christensen, K. B., Mortensen, O. S., Jemec, G. B. E., & Ibler, K. S. (2023). Prevalence and risk factors for hand eczema among professional hospital cleaners in Denmark: A cross-sectional questionnaire-based study. *Contact Dermatitis*, 89(4), 241–249. <https://doi.org/10.1111/cod.14379>
- Seifi, T., & Reza Kamali, A. (2021). Antiviral performance of graphene-based materials with emphasis on COVID-19: A review. *Medicine in Drug Discovery*, 11. <https://doi.org/10.1016/j.medidd.2021.100099>
- Sellaoui, L., Badawi, M., Monari, A., Tatarchuk, T., Jemli, S., Luiz Dotto, G., Bonilla-Petriciolet, A., & Chen, Z. (2021). Make it clean, make it

- safe: A review on virus elimination via adsorption. *Chemical Engineering Journal*, 412. <https://doi.org/10.1016/j.cej.2021.128682>
- Shepherd, E., Leitch, A., & Curran, E. (2020). A quality improvement project to standardise decontamination procedures in a single NHS board in Scotland. *Journal of Infection Prevention*, 21(6), 241–246. <https://doi.org/10.1177/1757177420947477>
- Sher, M., & Mulder, R. (2020). Comparison of Aerosolized Hydrogen Peroxide Fogging with a Conventional Disinfection Product for a Dental Surgery. *Journal of Contemporary Dental Practice*, 21(12), 1307–1311. <https://doi.org/10.5005/jp-journals-10024-2983>
- Shi, H., Liang, K., Ali, R., Xu, S., & Ding, S. (2022). Injection Injury Caused by Disinfectant During COVID-19: A Case Report. *Frontiers in Public Health*, 10. <https://doi.org/10.3389/fpubh.2022.851175>
- Si, Y., Zhang, Z., Wu, W., Fu, Q., Huang, K., Nitin, N., Ding, B., & Sun, G. (2018). Daylight-driven rechargeable antibacterial and antiviral nanofibrous membranes for bioprotective applications. *Science Advances*, 4(3). <https://doi.org/10.1126/sciadv.aar5931>
- Siani, H., & Maillard, J.-Y. (2015). Best practice in healthcare environment decontamination. *European Journal of Clinical Microbiology and Infectious Diseases*, 34(1), 1–11. <https://doi.org/10.1007/s10096-014-2205-9>
- Siani, H., Wesgate, R., & Maillard, J.-Y. (2018). Impact of antimicrobial wipes compared with hypochlorite solution on environmental surface contamination in a health care setting: A double-crossover study. *American Journal of Infection Control*, 46(10), 1180–1187. <https://doi.org/10.1016/j.ajic.2018.03.020>
- Simmons, S. E., Carrion, R., Alfson, K. J., Staples, H. M., Jinadatha, C., Jarvis, W. R., Sampathkumar, P., Chemaly, R. F., Khawaja, F., Povroznik, M., Jackson, S., Kaye, K. S., Rodriguez, R. M., & Stibich, M. A. (2021). Deactivation of SARS-CoV-2 with pulsed-xenon ultraviolet light: Implications for environmental COVID-19 control. *Infection Control and Hospital Epidemiology*, 42(2), 127–130. <https://doi.org/10.1017/ice.2020.399>
- Simmons, S., Wier, G., Pedraza, A., & Stibich, M. (2021). Impact of a pulsed xenon disinfection system on hospital onset *Clostridioides difficile* infections in 48 hospitals over a 5-year period. *BMC Infectious Diseases*, 21(1). <https://doi.org/10.1186/s12879-021-06789-y>
- Singih, S. I. R., Lantinga, H., Nater, J. P., Woest, T. E., & Kruyt-Gaspersz, J. A. (1986). Occupational hand dermatoses in hospital cleaning

personnel. *Contact Dermatitis*, 14(1), 14–19. <https://doi.org/10.1111/j.1600-0536.1986.tb01146.x>

- Sit, G., Letellier, N., Iwatsubo, Y., Goldberg, M., Leynaert, B., Nadif, R., Ribet, C., Roche, N., Roquelaure, Y., Varraso, R., Zins, M., Descatha, A., Moual, N. L., & Dumas, O. (2021). Occupational exposures to organic solvents and asthma symptoms in the CONSTANCES cohort. *International Journal of Environmental Research and Public Health*, 18(17). <https://doi.org/10.3390/ijerph18179258>
- Sit, G., Varraso, R., Fezeu, L. K., Galan, P., Orsi, F., Pacheco Da Silva, E., Touvier, M., Hercberg, S., Paris, C., Le Moual, N., & Dumas, O. (2022). Occupational Exposures to Irritants and Sensitizers, Asthma and Asthma Control in the Nutrinet-Santé Cohort. *Journal of Allergy and Clinical Immunology: In Practice*, 10(12), 3220-3227.e7. <https://doi.org/10.1016/j.jaip.2022.08.047>
- SJ, S., McNamee, R., Turner, S., Carder, M., & RM, A. (2013). Assessing the impact of national level interventions on workplace respiratory disease in the UK: part 1--changes in workplace exposure legislation and market forces. *Occupational and Environmental Medicine*, 70(7), 476–482. <https://doi.org/10.1136/oemed-2012-101123>
- SJ, S., McNamee, R., Turner, S., Carder, M., & RM, A. (2015). The impact of national-level interventions to improve hygiene on the incidence of irritant contact dermatitis in healthcare workers: changes in incidence from 1996 to 2012 and interrupted times series analysis. *The British Journal of Dermatology*, 173(1), 165–171. <https://doi.org/10.1111/bjd.13719>
- Society of Gastroenterology Nurses and Associates. (1996). The safe and effective handling of glutaraldehyde solutions. In *Gastroenterology nursing: the official journal of the Society of Gastroenterology Nurses and Associates* (Vol. 19, Issue 5, p. suppl 1-7). <https://pubmed.ncbi.nlm.nih.gov/9025390/>
- Sunday, Z., Baatjies, R., HH, M., & MF, J. (2023). Prevalence of work-related skin symptoms and associated factors among tertiary hospital workers exposed to cleaning agents in Southern Africa. *Contact Dermatitis*, 89(3), 178–189. <https://doi.org/10.1111/cod.14374>
- Song, X., Vossebein, L., & Zille, A. (2019). Efficacy of disinfectant-impregnated wipes used for surface disinfection in hospitals: A review. *Antimicrobial Resistance and Infection Control*, 8(1). <https://doi.org/10.1186/s13756-019-0595-2>
- Spencer, M., Vignari, M., Bryce, E., Johnson, H. B., Fauerbach, L., & Graham, D. (2017). A model for choosing an automated ultraviolet-C

disinfection system and building a case for the C-suite: Two case reports. *American Journal of Infection Control*, 45(3), 288–292.

<https://doi.org/https://doi.org/10.1016/j.ajic.2016.11.016>

- Starke, K. R., Friedrich, S., Schubert, M., Kämpf, D., Girbig, M., Pretzsch, A., Nienhaus, A., & Seidler, A. (2021). Are healthcare workers at an increased risk of obstructive respiratory diseases due to cleaning and disinfection agents? A systematic review and meta-analysis. *International Journal of Environmental Research and Public Health*, 18(10), 5159. <https://doi.org/10.3390/IJERPH18105159/S1>
- Steege, A. L., Boiano, J. M., & Sweeney, M. H. (2014). NIOSH Health and Safety Practices Survey of Healthcare Workers: Training and awareness of employer safety procedures. *American Journal of Industrial Medicine*, 57(6), 640–652. <https://doi.org/10.1002/ajim.22305>
- Stjärne Aspelund, A., Sjöström, K., Olsson Liljequist, B., Mörgelin, M., Melander, E., & Pählman, L. I. (2016). Acetic acid as a decontamination method for sink drains in a nosocomial outbreak of metallo- $\beta$ -lactamase-producing *Pseudomonas aeruginosa*. *Journal of Hospital Infection*, 94(1), 13–20. <https://doi.org/https://doi.org/10.1016/j.jhin.2016.05.009>
- Stoeva, I., Dencheva, M., Mircheva, K., & Chonin, A. (2020). Respiratory Symptoms of Exposure to Substances in the Workplace among Bulgarian Dental Students: A Self-report Questionnaire Survey. *Folia Medica*, 62(1), 141–146. <https://doi.org/10.3897/folmed.62.e48268>
- Su, F.-C., Friesen, M. C., Stefaniak, A. B., Henneberger, P. K., LeBouf, R. F., Stanton, M. L., Liang, X., Humann, M., & Abbas Virji, M. (2018). Exposures to volatile organic compounds among healthcare workers: Modeling the effects of cleaning tasks and product use. *Annals of Work Exposures and Health*, 62(7), 852–870. <https://doi.org/10.1093/annweh/wxy055>
- Su, F. C., Friesen, M. C., Humann, M., Stefaniak, A. B., Stanton, M. L., Liang, X., LeBouf, R. F., Henneberger, P. K., & Virji, M. A. (2019). Clustering asthma symptoms and cleaning and disinfecting activities and evaluating their associations among healthcare workers. *International Journal of Hygiene and Environmental Health*, 222(5), 873–883. <https://doi.org/10.1016/J.IJHEH.2019.04.001>
- Takigawa, T., & Endo, Y. (2006). Effects of glutaraldehyde exposure on human health. *Journal of Occupational Health*, 48(2), 75–87. <https://doi.org/10.1539/joh.48.75>
- Tang, H., Wang, H., Hamblin, M. R., Jiang, L., Zhou, Y., Xu, Y., & Wen, X. (2023). Contact dermatitis caused by prevention measures during the

COVID-19 pandemic: a narrative review. *Frontiers in Public Health*, 11. <https://doi.org/10.3389/fpubh.2023.1189190>

Tasar, R., Wiegand, C., & Elsner, P. (2021). How irritant are n-propanol and isopropanol? – A systematic review. *Contact Dermatitis*, 84(1), 1–14. <https://doi.org/10.1111/cod.13722>

Teska, P., Gauthier, J., Lamb, J., & Hug, A. (2022). Powered air-purifying respirator (PAPR) disinfection and risk of surface damage from hydrogen peroxide and quaternary ammonium chloride-based disinfectants. *Journal of Occupational and Environmental Hygiene*, 19(8), 449–454. <https://doi.org/10.1080/15459624.2022.2088771>

TL, G. (1987). Occupational health for hospital workers. *American Family Physician*, 35(2), 137–142. <https://pubmed.ncbi.nlm.nih.gov/2949570/>

Tofanelli, M., Capriotti, V., Saraniti, C., Marcuzzo, A. V, Boscolo-Rizzo, P., & Tirelli, G. (2020). Disposable chlorine dioxide wipes for high-level disinfection in the ENT department: A systematic review. *American Journal of Otolaryngology - Head and Neck Medicine and Surgery*, 41(3). <https://doi.org/10.1016/j.amjoto.2020.102415>

Tomb, R. M., White, T. A., Coia, J. E., Anderson, J. G., MacGregor, S. J., & Maclean, M. (2018). Review of the Comparative Susceptibility of Microbial Species to Photoinactivation Using 380–480 nm Violet-Blue Light. *Photochemistry and Photobiology*, 94(3), 445–458. <https://doi.org/10.1111/php.12883>

Tyski, S., Bocian, E., & Laudy, A. E. (2022). Application of normative documents for determination of biocidal activity of disinfectants and antiseptics dedicated to the medical area: a narrative review. *Journal of Hospital Infection*, 125, 75–91. <https://doi.org/https://doi.org/10.1016/j.jhin.2022.03.016>

Tyski, S., Grzybowska, W., & Bocian, E. (2021). Application of en 16615 (4-field test) for the evaluation of the antimicrobial activity of the selected commercial and self-made disinfectant wipes. *International Journal of Environmental Research and Public Health*, 18(11). <https://doi.org/10.3390/ijerph18115932>

Vaidya, M., Gangakhedkar, G., Shetty, A., & Waghalkar, P. (2020). A rare occurrence of accidental exposure to UV radiation among operating theatre personnel. *Indian Journal of Anaesthesia*, 64(3), 230–232. [https://doi.org/10.4103/ija.IJA\\_656\\_19](https://doi.org/10.4103/ija.IJA_656_19)

- van den Berg, R. B., de Poot, S., Swart, E. L., & Crul, M. (2021). Assessment of occupational exposure to nebulized isopropyl alcohol as disinfectant during aseptic compounding of parenteral cytotoxic drugs in cleanrooms. *Journal of Occupational and Environmental Hygiene*, *18*(8), 361–368. <https://doi.org/10.1080/15459624.2021.1933505>
- VC, D., MM, C., Adisesh, A., & BN, S. (2003). Occupational allergic contact dermatitis in hospital workers caused by methyldibromo glutaronitrile in a work soap. In *Contact dermatitis* (Vol. 48, Issue 2, pp. 118–119). [https://doi.org/10.1034/j.1600-0536.2003.480212\\_5.x](https://doi.org/10.1034/j.1600-0536.2003.480212_5.x)
- Versoza, M., Heo, J., Ko, S., Kim, M., & Park, D. (2020). Solid oxygen-purifying (SOP) filters: A self-disinfecting filters to inactivate aerosolized viruses. *International Journal of Environmental Research and Public Health*, *17*(21), 1–11. <https://doi.org/10.3390/ijerph17217858>
- Viechtbauer, W. (2010). Conducting Meta-Analyses in R with the metafor Package. *Journal of Statistical Software*, *36*(3 SE-Articles), 1–48. <https://doi.org/10.18637/jss.v036.i03>
- Vincent, M. J., Parker, A., & Maier, A. (2017). Cleaning and asthma: A systematic review and approach for effective safety assessment. *Regulatory Toxicology and Pharmacology*, *90*, 231–243. <https://doi.org/10.1016/j.yrtph.2017.09.013>
- Vizcaya, D., Mirabelli, M. C., Orriols, R., Antó, J. M., Barreiro, E., Burgos, F., Arjona, L., Gomez, F., & Zock, J.-P. (2013). Functional and biological characteristics of asthma in cleaning workers. *Respiratory Medicine*, *107*(5), 673–683. <https://doi.org/10.1016/j.rmed.2013.01.011>
- Walton, A. L., & Rogers, B. (2017). Workplace hazards faced by nursing assistants in the United States: A focused literature review. *International Journal of Environmental Research and Public Health*, *14*(5). <https://doi.org/10.3390/ijerph14050544>
- Watanabe, R., Shimoda, T., Yano, R., Hayashi, Y., Nakamura, S., Matsuo, J., & Yamaguchi, H. (2014). Visualization of hospital cleanliness in three Japanese hospitals with a tendency toward long-term care. *BMC Research Notes*, *7*, 121. <https://doi.org/10.1186/1756-0500-7-121>
- WB, P., DE, C., DA, S., EA, N., Kasmer, J., & Noble, J. (1985). Occupational hazards to hospital personnel. *Annals of Internal Medicine*, *102*(5), 658–680. <https://doi.org/10.7326/0003-4819-102-5-658>
- Weber, D. J., Rutala, W. A., Anderson, D. J., Chen, L. F., Sickbert-Bennett, E. E., & Boyce, J. M. (2016). Effectiveness of ultraviolet devices and hydrogen peroxide systems for terminal room decontamination: Focus on clinical trials. *American Journal of Infection Control*, *44*(5), e77–

e84. <https://doi.org/10.1016/j.ajic.2015.11.015>

Weber, D. J., Rutala, W. A., Sickbert-Bennett, E. E., Kanamori, H., & Anderson, D. (2019). Continuous room decontamination technologies. *American Journal of Infection Control*, 47, A72–A78. <https://doi.org/10.1016/j.ajic.2019.03.016>

Whitworth, K. W., Berumen-Flucker, B., Delclos, G. L., Fragoso, S., Mata, C., & Gimeno Ruiz de Porras, D. (2020). Job hazards and respiratory symptoms in Hispanic female domestic cleaners. *Archives of Environmental and Occupational Health*, 75(2), 70–74. <https://doi.org/10.1080/19338244.2019.1606774>

Wilson, A. M., Mussio, I., Chilton, S., Gerald, L. B., Jones, R. M., Drews, F. A., LaKind, J. S., & Beamer, P. I. (2022). A Novel Application of Risk–Risk Tradeoffs in Occupational Health: Nurses’ Occupational Asthma and Infection Risk Perceptions Related to Cleaning and Disinfection during COVID-19. *International Journal of Environmental Research and Public Health*, 19(23). <https://doi.org/10.3390/ijerph192316092>

Wilson, A. M., O. Ogunseye, O., Fingesi, T., McClelland, D. J., Gerald, L. B., Harber, P., Beamer, P. I., & Jones, R. M. (2023a). Exposure frequency, intensity, and duration: What we know about work-related asthma risks for healthcare workers from cleaning and disinfection. *Journal of Occupational and Environmental Hygiene*, 20(8), 350–363. <https://doi.org/10.1080/15459624.2023.2221712>

Wilson, A. M., O. Ogunseye, O., Fingesi, T., McClelland, D. J., Gerald, L. B., Harber, P., Beamer, P. I., & Jones, R. M. (2023b). Exposure frequency, intensity, and duration: What we know about work-related asthma risks for healthcare workers from cleaning and disinfection. *Journal of Occupational and Environmental Hygiene*, 20(8), 350–363. <https://doi.org/10.1080/15459624.2023.2221712>

Wiszniewska, M., & Walusiak-Skorupa, J. (2014). Occupational allergy: respiratory hazards in healthcare workers. *Current Opinion in Allergy and Clinical Immunology*, 14(2), 113–118. <https://doi.org/10.1097/ACI.0000000000000039>

WJ, E., RM, B., Lash, A., & CE, B. (1990). Neurotoxicological evaluation of hospital sterilizer workers exposed to ethylene oxide. *Journal of Toxicology. Clinical Toxicology*, 28(1), 1–20. <https://doi.org/10.3109/15563659008993472>

Wright, J. R., Ly, T. T., Cromwell, K. B., Brislawn, C. J., Chen See, J. R., Anderson, S. L. C., Pellegrino, J., Peachey, L., Walls, C. Y., Lloyd, C.



- M., Jones, O. Y., Lawrence, M. W., Bess, J. A., Wall, A. C., Shope, A. J., & Lamendella, R. (2023). Assessment of a novel continuous cleaning device using metatranscriptomics in diverse hospital environments. *Frontiers in Medical Technology*, 5. <https://doi.org/10.3389/fmedt.2023.1015507>
- Xie, W., Dumas, O., Varraso, R., Boggs, K. M., Camargo, C. A., & Stokes, A. C. (2021). Association of Occupational Exposure to Inhaled Agents in Operating Rooms with Incidence of Chronic Obstructive Pulmonary Disease among US Female Nurses. *JAMA Network Open*. <https://doi.org/10.1001/jamanetworkopen.2021.25749>
- Yang, D., Lin, L., Guo, P., Zhang, W., He, X., Huang, Q., Lai, L., & Long, W. (2017). Flashlight contamination and effectiveness of two disinfectants in a stomatology hospital. *International Journal of Nursing Sciences*, 4(2), 169–172. <https://doi.org/https://doi.org/10.1016/j.ijnss.2017.03.008>
- Yanke, E., Moriarty, H., Carayon, P., & Safdar, N. (2021). “The invisible staff”: a qualitative analysis of environmental service workers’ perceptions of the VA clostridium difficile prevention bundle using a human factors engineering approach. *Journal of Patient Safety*, 17(8), E806–E814. <https://doi.org/10.1097/PTS.0000000000000500>
- Ye, G., Lin, H., Chen, S., Wang, S., Zeng, Z., Wang, W., Zhang, S., Rebmann, T., Li, Y., Pan, Z., Yang, Z., Wang, Y., Wang, F., Qian, Z., & Wang, X. (2020). Environmental contamination of SARS-CoV-2 in healthcare premises. *The Journal of Infection*, 81(2), e1–e5. <https://doi.org/10.1016/j.jinf.2020.04.034>
- Youssef, D., Abou-Abass, L., & Hassan, H. (2023). Unveiling the unknown: first comprehensive assessment of the knowledge, attitudes and practices of hospital cleaning services staff regarding COVID-19 in Lebanon during the pandemic. *Archives of Public Health*, 81(1). <https://doi.org/10.1186/s13690-023-01149-5>
- Yüksel, Y. T., Nørreslet, L. B., Flachs, E. M., Ebbenhøj, N. E., & Agner, T. (2022). Hand eczema, wet work exposure, and quality of life in health care workers in Denmark during the COVID-19 pandemic. *JAAD International*, 7, 86–94. <https://doi.org/10.1016/j.jdin.2022.02.009>
- Yüksel, Y. T., Sonne, M., Nørreslet, L. B., Gundersen, G., Fazli, M. M., & Agner, T. (2022). Skin barrier response to active chlorine hand disinfectant—An experimental study comparing skin barrier response to active chlorine hand disinfectant and alcohol-based hand rub on

healthy skin and eczematous skin. *Skin Research and Technology*, 28(1), 89–97. <https://doi.org/10.1111/srt.13096>

Zahrallayali, A., Al-Dobokey, A., Alosaimy, R., Alabbasi, R., Alharbi, S., Fageeh, S., Altayyar, S., & Azher, R. (2021). The prevalence and clinical features of skin irritation caused by infection prevention measures during covid-19 in the mecca region, saudi arabia. *Clinical, Cosmetic and Investigational Dermatology*, 14, 889–899. <https://doi.org/10.2147/CCID.S309681>

Zhang, X.-B., Wei, Y.-L., Zhao, G., He, M., Sun, J., & Zeng, W. (2023). Coronavirus disease 2019: Repeated immersion of chlorine-containing disinfectants has adverse effects on goggles. *Frontiers in Public Health*, 11. <https://doi.org/10.3389/fpubh.2023.1016938>
